1 Gene expression plasticity and frontloading promote  
2 thermotolerance in Pocilloporid corals

3  
4 Running title: *Pocillopora* holobiont response to heat stress  
5

6 Brener-Raffalli K.<sup>1</sup> (kelly.brener@univ-perp.fr), Vidal-Dupiol J.<sup>2</sup> (jeremie.vidal.dupiol@ifremer.fr),  
7 Adjeroud M.<sup>3</sup> (mehdi.adjeroud@ird.fr), Rey O.<sup>1</sup> (olivier.rey@univ-perp.fr), Romans P.<sup>4</sup>  
8 (pascal.romans@obs-banyuls.fr), Bonhomme F.<sup>5</sup> (francois.bonhomme@univ-montp2.fr), Pratlong M.<sup>6,7</sup>  
9 (marine.pratlong@gmail.com), Haguenaer A.<sup>7</sup> (haguenaer.a@gmail.com), Pillot R.<sup>4</sup> (remi.pillot@obs-  
10 banyuls.fr), Feuillassier L.<sup>4</sup> (lionel.feuillassier@mnhn.fr), Claereboudt M.<sup>8</sup> (michelc@squ.edu.om), Magalon  
11 H.<sup>9</sup> (helene.magalon@univ-reunion.fr), Gélina P.<sup>9</sup> (pauline.gelin87@gmail.com), Pontarotti P.<sup>6</sup>  
12 (pierre.pontarotti@univ-amu.fr), Aurelle D.<sup>7,10</sup> (didier.aurelle@univ-amu.fr), Mitta G.<sup>1</sup> (mitta@univ-  
13 perp.fr) and Toulza E.<sup>1\*</sup> (eve.toulza@univ-perp.fr).

14  
15 1 Univ. Perpignan Via Domitia, IHPE UMR 5244, CNRS, IFREMER, Univ. Montpellier, F-66860 Perpignan,  
16 France.

17 2 IFREMER, IHPE UMR 5244, Univ. Perpignan Via Domitia, CNRS, Univ. Montpellier, F-34095 Montpellier,  
18 France.

19 3 Institut de Recherche pour le Développement, UMR 9220 ENTROPIE, Laboratoire d'Excellence  
20 "CORAIL", UPVD 52 Avenue Paul Alduy, 66860 Perpignan, France.

21 4 Sorbonne Universités, UPMC Univ Paris 06, UMS 2348, Centre de Ressources Biologiques Marines,  
22 Observatoire Océanologique, F-66650 Banyuls/Mer, France.

23 5 CNRS, Institut des Sciences de l'Évolution, UMR 5554 CNRS-UM-IRD-EPHE, Sète, France.

24 6 Aix-Marseille Université, CNRS UMR 7353, Équipe Evolution Biologique et Modélisation, 13331  
25 Marseille, France.

26 7 Aix-Marseille Université, Avignon Université, CNRS, IRD, IMBE, Marseille, France

27 8 Department of Marine Science and Fisheries, College of Agricultural and Marine Sciences, Sultan Qaboos  
28 University, Al-Khod, 123, Sultanate of Oman.

29 9 UMR 9220 ENTROPIE (Université de La Réunion, IRD, CNRS), Laboratoire d'excellence "CORAIL",  
30 Université de La Réunion, St Denis, La Réunion, France.

31 10 Aix-Marseille Université, Université de Toulon CNRS, IRD, MIO, Marseille, France

32  
33 \* Corresponding author  
34

35 **ABSTRACT**

36 Ecosystems worldwide are suffering from climate change. For example, the coral reef ecosystems are  
37 globally threatened by increasing sea surface temperatures. However gene expression plasticity provides  
38 the potential for organisms to respond rapidly and effectively to environmental change, and would be  
39 favored in variable environments. In this study we investigated the thermal stress response of  
40 Pocilloporid corals from two contrasting thermal regimes (more stable seawater temperatures in New  
41 Caledonia, more variable in Oman) by exposing them to heat stress. We compared the physiological state,  
42 bacterial and *Symbiodinium* communities (using 16S and ITS2 metabarcoding), and gene expression levels  
43 (using RNA-Seq) between control conditions and heat stress (the temperature just below the first signs of  
44 compromised health). Colonies from both thermal regimes remained apparently normal and had open and  
45 colored polyps during heat stress, with no change in bacterial and *Symbiodinium* community composition.  
46 In contrast, they differed in their transcriptomic responses. The thermotolerant colonies (Oman)  
47 presented a more plastic transcriptome (more differentially expressed genes and higher fold-changes  
48 between control and heat stress conditions), but some other genes had a higher basal expression level  
49 (frontloading) compared to the thermosensitive colonies (New Caledonia). In terms of biological function  
50 we observed a trade-off between stress response (including induction of tumor necrosis factor receptors,  
51 heat shock proteins, and detoxification of reactive oxygen species) and morpho-anatomical functions.  
52 Gene regulation (transcription factors, mobile elements) appeared to be highly enriched, indicating  
53 possible epigenetic regulation. These results provide new insights into the balance between plasticity and  
54 frontloading, and the origin and evolution of these strategies.

55 **KEYWORDS:** Gene expression plasticity, Frontloading, Coral holobiont, *Pocillopora*, Heat stress.

56

## 57 INTRODUCTION

58 Earth is undergoing unprecedented global environmental changes with major effects on biodiversity  
59 (Barnosky *et al.* 2011). The ongoing erosion of the most vulnerable ecosystems due to current  
60 environmental degradation is particularly worrying and is only a premise to what scientists have called  
61 the sixth mass extinction (Barnosky *et al.* 2011). In particular, climate change, ocean acidification and the  
62 exceptional frequency to which extreme climatic events occur have already resulted in the irreversible  
63 degradation of more than 20% of coral reefs worldwide (Bellwood *et al.* 2004; Hoegh-Guldberg *et al.*  
64 2007). Scleractinian corals constitute the biological and physical framework for a large diversity of marine  
65 organisms [c.a. ~600 coral, ~2000 fish, and ~5000 mollusk species (Veron & Stafford-Smith 2000; Reaka-  
66 Kudla 2005). Hence, the extinction or even major decrease of corals would have dramatic repercussions  
67 on the overall associated community (Hughes *et al.* 2017a). Natural variation in thermal tolerance exists  
68 among coral populations (Oliver & Palumbi 2010; Palumbi *et al.* 2014), especially along a latitudinal  
69 gradient (Polato *et al.* 2010; Dixon *et al.* 2015), hence providing some hope for coral survival based on  
70 their capacity to acclimatize and/or adapt. More specifically, populations inhabiting in zones with more  
71 variable temperature regimes display better tolerance to heat stress. This pattern can be verified from  
72 local scale (Kenkel *et al.* 2013; Palumbi *et al.* 2014) to geographical scale (Hughes *et al.* 2003; Riegl *et al.*  
73 2011; Coles & Riegl 2013)

74         Understanding the evolutionary processes underlying coral thermo-tolerance at the host level is  
75 crucial to better predict the fate of coral populations in response to climate change. In particular, it  
76 remains unclear whether thermo-tolerance is acquired via acclimatization (i.e. intra-generational gene  
77 expression plasticity; (Barnosky *et al.* 2011; Kenkel & Matz 2016) and/or through Darwinian adaptation  
78 (i.e. inter-generational microevolution; (Barnosky *et al.* 2011; Dixon *et al.* 2015). Under the former  
79 hypothesis one should expect that the present-day sensitive coral populations could potentially acquire  
80 tolerance to heat stress along with the ongoing climate change. According to the latter hypothesis, the  
81 persistence of initially thermo-sensitive coral populations would depend on the emergence of better  
82 adapted lineages through microevolution and/or on the genetic rescue via gene flow from populations  
83 already adapted to heat stress (Bellwood *et al.* 2004; Dixon *et al.* 2015). Actually, some studies strongly

84 suggest that both processes (i.e. acclimatization and adaptation) are likely to co-occur in wild coral  
85 populations (Hoegh-Guldberg *et al.* 2007; Reusch 2013; Palumbi *et al.* 2014).

86         The recent advent of high throughput molecular methods have made it possible to go beyond the  
87 distinction between the evolutionary processes and focus further on the molecular mechanisms  
88 underlying coral response to heat stress. In particular, recent studies clearly demonstrated that coral  
89 responses to heat stress involve the fine-tuned regulation of expression levels of some genes/proteins  
90 involved in several molecular pathways such as metabolism, stress-response and apoptosis (Veron &  
91 Stafford-Smith 2000; Brown *et al.* 2002; Weis 2008; Ainsworth *et al.* 2011; Bellantuono *et al.* 2012a;  
92 Barshis *et al.* 2013; Palumbi *et al.* 2014; Kenkel & Matz 2016). In this regard, two main molecular patterns  
93 having different temporalities have been put forward. One would be “transcriptional plasticity”, i.e.  
94 extensive changes in gene expression levels according to the occurring thermal condition and the other is  
95 coined “transcriptional frontloading”, i.e. the elevation of stress related genes baseline expression that  
96 precondition organisms to subsequent (recurrent) stresses (Reaka-Kudla 2005; Mayfield *et al.* 2011;  
97 Barshis *et al.* 2013; Palumbi *et al.* 2014; Hughes *et al.* 2017a). While such elevated constitutive gene  
98 expression levels could reflect local adaptation (i.e. genetically fixed gene expression level; (Oliver &  
99 Palumbi 2010; Palumbi *et al.* 2014), it could also reflect an acclimation process via stable epigenetic  
100 constitutive gene expression regulation. Surprisingly, frontloading and gene expression plasticity were  
101 generally discussed as mutually exclusive patterns (Barshis *et al.* 2013; Dixon *et al.* 2015; Kenkel & Matz  
102 2016) although these two molecular processes most likely co-occur during coral responses to heat stress.  
103 In particular, one might expect that the regulation strategy of genes (plasticity versus frontloading) will  
104 greatly depend on the molecular pathways in which they are involved and the energetic, physiological,  
105 and ultimately fitness cost associated with gene expression. So far, frontloading has been detected for  
106 stress response genes such as Heat Shock Proteins (HSPs), apoptosis and tumour suppression factors in  
107 resilient coral populations under experimentally simulated heat stress inducing bleaching in the common  
108 reef-building coral *Acropora hyacinthus* (Polato *et al.* 2010; Barshis *et al.* 2013) and for metabolic genes in  
109 populations pre-exposed to warm temperatures in response to long-term heat stress in *Porites astreoides*  
110 (Kenkel *et al.* 2013; Palumbi *et al.* 2014). Conversely, in the latter species, plasticity was observed in the  
111 expression of environmental stress response genes (Riegl *et al.* 2011; Kenkel & Matz 2016), hence

112 challenging the patterns observed in *A. hyacinthus* (Barshis *et al.* 2013; Coles & Riegl 2013). Although both  
113 strategies (i.e. constitutive frontloading versus expression plasticity) undoubtedly exists in wild coral  
114 populations, the pre-exposure conditions that foster their induction and their relative effects on coral  
115 resistance to heat stress still remain unclear (but see (Hughes *et al.* 2003; Kenkel & Matz 2016)).

116         Importantly, scleractinian corals are composed of several symbiotic organisms including the  
117 cnidarian host, the mutualist photosynthetic algae (genus *Symbiodinium*) and bacterial communities. All  
118 partners (bionts) involved in a stable symbiosis effectively form the entire organism, and constitute what  
119 is referred to as the holobiont (Margulis & Fester 1991). A decade after this term was defined, its use has  
120 been particularly popularized in reference to corals (Rohwer *et al.* 2002), and subsequent research has led  
121 to the hologenome theory of evolution (Rosenberg *et al.* 2007; Zilber-Rosenberg & Rosenberg 2008). In  
122 this context the hologenome is defined as the sum of the genetic information of the host and its symbiotic  
123 microorganisms. Phenotypes are thus the product of the collective genomes of the holobiont partners in  
124 interaction with the environment, which constitute the unit of biological organization and thus the object  
125 of natural selection (Zilber-Rosenberg & Rosenberg 2008; Guerrero *et al.* 2013; McFall-Ngai *et al.* 2013;  
126 Bordenstein & Theis 2015; Theis *et al.* 2016). Additionally to the cnidarian host response, the genotype -or  
127 association of genotypes- of the photosynthetic mutualist *Symbiodinium* symbionts plays a key role in the  
128 thermotolerance of the holobiont (Mayfield *et al.* 2014; Hume *et al.* 2015; Suggest *et al.* 2017; Mayfield *et*  
129 *al.* 2018). There is less certainty about the importance of the coral bacterial community in participating to  
130 the fitness of the holobiont, although accruing evidences strongly suggest their implication in coral  
131 response to environmental conditions (Li *et al.* 2014; Pantos *et al.* 2015; Hernandez-Agreda *et al.* 2016)  
132 and in the resistance to disease (Sato *et al.* 2009; Cróquer *et al.* 2013; Meyer *et al.* 2015). Finally, the role  
133 of the coral-associated microbes and their potential to modify holobiont adaptability remain so far  
134 overlooked (but see (Ziegler *et al.* 2017; Torda *et al.* 2017)). Hence studying how corals respond to stress  
135 implies an integrative approach to analyze the response of each symbiotic protagonist.

136         The aim of the present study was to investigate the molecular mechanisms underlying thermo-  
137 tolerance of coral holobionts. We analyzed the holobiont response to stress of two coral populations  
138 originating from environments with contrasting thermal regimes. We used the scleractinian corals from  
139 the genus *Pocillopora* as model species because they have a broad spatial distribution throughout the

140 Indo-Pacific (Veron & Stafford-Smith 2000). These coral species are considered to be one of the most  
141 environmentally sensitive (van Woesik *et al.* 2011) but their widespread distribution clearly suggests  
142 potential for acclimatization and/or adaptation which may be correlated to specific differences (i.e.  
143 different cryptic lineages may be adapted to different environmental conditions). In particular, we focused  
144 on *Pocillopora* colonies from two localities with contrasting thermal regimes: colonies from New  
145 Caledonia (NC) are exposed to temperate and stable temperatures over the year, while those from Oman  
146 are exposed to globally warmer and more seasonal fluctuating temperatures. In order to interpret the  
147 results in a precise evolutionary context we first identified the mitochondrial lineage of the colonies. To  
148 avoid biases inherent in transplantation-based field experiments resulting from environmental factors  
149 other than temperature, we undertook our comparative study in a controlled environment in which we  
150 mimicked ecologically realistic heat stress to compare the responses of colonies from both localities. We  
151 combined a specific RNA-seq approach to study the cnidarians host response, and metabarcoding analyses  
152 using ITS-2 and 16S amplicon sequencing to study the dynamics of the associated algal (*Symbiodinium* sp.)  
153 and microbial community compositions, respectively. According to the literature we first expected to  
154 detect changes in both symbiotic algal and bacterial communities in corals from both localities when  
155 exposed to heat stress. Moreover, since variable environments are expected to promote the evolution of  
156 plasticity, we predicted that the cnidarian hosts from Oman will display more gene expression plasticity  
157 than those from New Caledonia. However, because frontloading was also found to be an alternative  
158 response to recurrent changing conditions, we might also expect some degrees of constitutive high levels  
159 of gene expression at least for some molecular pathways and more particularly in Oman corals.

## 160 MATERIAL AND METHODS

### 161 CORAL SAMPLING AND MAINTENANCE

162 *Pocillopora damicornis*-like colonies originating from environments characterized by contrasting thermal  
163 regimes were sampled in two different localities: (1) in Oman (Om; June 2014), where corals are exposed  
164 to a globally warmer and variable thermal environment, and (2) in New Caledonia (NC; November 2014),  
165 where corals are subject to more mitigate and stable temperatures (see Table 1 for the temperature  
166 regime of locality). At this aim, we sampled colonies from the two geographical locations occupying the  
167 same apparent morphological and water depth niche. To account for possible intra-population diversity,

168 three colonies (20 cm in diameter) were collected in each locality, and separated by at least 10 m to avoid  
169 the collection of members of the same clone or clonal lineage, as some *Pocillopora* species are able to  
170 propagate by asexual reproduction (Adjeroud *et al.* 2013). Immediately following collection, a 1 cm tip of  
171 each colony was excised, rinsed three times in filtered seawater (0.22 µm), and placed in RNAlater  
172 solution (Sigma Aldrich) for the *in situ* microbiota analysis. The remainder of the colony was fragmented  
173 into 20 branches each of 10 cm length, and these were individually placed in plastic bags containing  
174 oxygenated seawater, and transported by aircraft to the research aquarium of the Banyuls-sur-Mer  
175 oceanographic observatory (France). The coral branches were maintained in artificial seawater (Seachem  
176 Reef Salt) at 26°C, and supplied daily with *Artemia* nauplii to satisfy their heterotrophic demand. The  
177 conditions in the maintenance tank were controlled to mimic the natural physicochemical parameters of  
178 coral reefs (pH: 8.2; salinity: 36 g/L; light Intensity: 150 to 250 photons/m<sup>2</sup>/s; photoperiod: 12h  
179 night/12h day; kH: 6–7.5 dkH; calcium concentration: 410–450 mg/L; inorganic phosphate concentration:  
180 < 0.1 mg/L; magnesium concentration: 1300–1400 mg/L; nitrate concentration: < 5 mg/L). After two  
181 months of acclimation in the lab, the coral branches were fragmented to produce several clones from each  
182 colony (~3 cm). These were individually fixed to a support (here a p1000 tip) using an epoxy adhesive.  
183 We waited for complete healing (evident as tissue extending to cover the epoxy adhesive) prior to run the  
184 experiment.

## 185 ECOLOGICALLY REALISTIC HEAT STRESS

186 The aim of this experiment was to compare the response to heat stress of colonies from two localities  
187 having the same physiological state, to investigate the patterns of expression of the molecular pathways  
188 involved during the stress exposure and the putative modifications of the coral microbiota.

189 The experimental design comprised eight tanks of 53 L (four per locality) in which the seawater was  
190 continuously recycled. The water was sterilized using UV (rate 3200 L/h) and renewed twice per hour in  
191 each tank (recirculation rate: 100 L/h in each tank). The eight tanks shared the same seawater but their  
192 temperature was monitored individually (HOBBY BiothermPro, model 10892; 500W AquaMedic titanium  
193 heater; HOBO TidbiT v2 logger). For each population, at least four nubbins per mother colonies were  
194 randomly placed in each tank (four tanks per locality) for two weeks at 26°C and the following protocol  
195 was applied: three tanks were subjected to a gradual temperature increase (stress treatment) while the

196 fourth (control) was maintained at the control temperature. These controls were used to assess that the  
197 stress observed in the stressful treatment was not due to other potential confounding effects (Fig. 1). Both  
198 the control and stress temperatures were specific for each sampling locality to mimic their respective  
199 natural environment. In particular, we set the control temperature as the mean water temperature for the  
200 three warmer months measured at the coral sampling site locality (Table 1): 31°C for the colonies from  
201 Om, and 27°C for the colonies from NC. The stress treatment was ecologically realistic, i.e. reflecting a  
202 naturally occurring warming anomaly, and consisted in increasing the temperature gradually by 1°C (over  
203 5 consecutive hours) each week until physiological collapse of the corals became evident (polyps closure,  
204 bleaching or necrosis), as described by (Vidal-Dupiol *et al.* 2009). Sampling was performed each week  
205 before the temperature increase and were chosen *a posteriori* for subsequent genetic and transcriptomic  
206 analyses. This corresponded to those sampled in each tank just before the first increase of temperature  
207 (control samples), and just before the temperature that produced the first signs of physiological collapse  
208 (stress temperature samples). Thus, for each condition (control and stress) we obtained three replicates  
209 of each colony (three colonies per locality) to reach a total of 36 samples (2 localities × 3 colonies × 2  
210 experimental conditions × 3 replicates). The general health of the nubbins was assessed via daily  
211 photographic monitoring (at noon prior to feeding) throughout the period of the experiment.

## 212 DNA EXTRACTION

213 DNA was extracted from each 36 samples as well as coral tips directly collected on the six colonies *in*  
214 *natura* for the *in situ* condition (three in Oman, three in New Caledonia), using the DNeasy Blood and  
215 Tissue kit (Qiagen) following the manufacturer's instructions. DNA was quantified by spectrophotometry  
216 (NanoDrop).

## 217 HOST HAPLOTYPE

218 As the *corallum* macro-morphology is not a diagnostic criterion in *Pocillopora* genus, the host species was  
219 thus identified molecularly. We analyzed the mitochondrial variable open reading frame (ORF) sequence  
220 of each colony using the FATP6.1 and RORF primers and following the protocol detailed in (Flot & Tillier  
221 2007). The PCR products were sequenced using Sanger sequencing, and the obtained sequences were  
222 aligned with the ORF haplotypes from Gélina *et al.* (2017a) using Geneious 8.0 (Kearse *et al.*, 2012) with the  
223 MAFFT algorithm (Katoh *et al.* 2005). Each colony used in the experiment was then assigned to Primary



224 Species Hypothesis (PSH) following the nomenclature from G elin *et al.* (2017a). Furthermore, to refine the  
225 assignment with the ORF to Secondary Species Hypothesis (SSH) and to identify whether the sampled  
226 colonies are members of a same clone, they were genotyped using 13 specific microsatellites as in G elin *et*  
227 *al.* (2017a). If relevant, the colonies were assigned to SSH. Meanwhile, the identical multi-locus genotypes  
228 were identified as in G elin *et al.* (2017b).

## 229 MICROBIAL COMMUNITY ANALYSIS USING MISEQ 16S AND ITS2 230 METABARCODING

231 The aim of this analysis was to investigate the composition and the dynamics of the two principal  
232 symbiotic coral communities (i.e. bacterial and algal) *in situ* and during heat stress.

## 233 234 AMPLICON SEQUENCING

235 A bacterial 16S rDNA amplicon library was generated for each of the 42 samples (one *in situ* condition,  
236 three control conditions and three stress conditions per colony, three colonies per locality, two localities),  
237 using the 341F (CCTACGGGNGGCWGCAG) and 805R (GACTACHVGGGTATCTAATCC) primers, which target  
238 the variable V3/V4 loops (Klindworth *et al.* 2012). The *Symbiodinium* assemblages were analyzed using  
239 ITS2 (internal transcribed spacer of the ribosomal RNA gene) amplicon libraries and specific primers  
240 targeting a sequence of approximately 350 bp (ITS2-F GTGAATTGCAGAACTCCGTG; ITS2-R  
241 CCTCCGCTTACTTATATGCTT) (Lajeunesse & Trench 2000; Quigley *et al.* 2014). For both markers, paired-  
242 end sequencing using a 250 bp read length was performed on the MiSeq system (Illumina) using the v2  
243 chemistry, according to the manufacturer's protocol at the Centre d'Innovation G enome Qu ebec and  
244 McGill University, Montreal, Canada.

## 245 BIOINFORMATIC ANALYSIS:

246 The FROGS pipeline (Find Rapidly OTU with Galaxy Solution) implemented on a Galaxy platform  
247 (<http://sigenae-workbench.toulouse.inra.fr/galaxy/>) was used for data processing (Escudi  *et al.* 2015).  
248 In brief, paired reads were merged using FLASH (Mago  & Salzberg 2011). After cleaning and removal of  
249 primer/adapters using cutadapt (Martin 2011), *de novo* clustering was performed using SWARM (Mah  *et*  
250 *al.* 2014). This uses a local clustering threshold with an aggregation distance (d) of 3. Chimeras were  
251 removed using VSEARCH (Rognes *et al.* 2016). We filtered the dataset for singletons and performed  
252 affiliation using Blast+ against the Silva database (release 128, September 2016) for 16S amplicons

253 (Altschul *et al.* 1990). For ITS2 metabarcoding, the *Symbiodinium* type was assessed using Blast+ against  
254 an in-house database of *Symbiodinium* reference sequences built from sequences publicly available. An  
255 OTU table in standard BIOM format with taxonomic affiliation was produced for subsequent analyses.

256 For community composition analysis we used the *phyloseq* R package (McMurdie & Holmes 2013) to infer  
257 alpha diversity metrics at the OTU level, and beta diversity (between sample similarity) from the OTU  
258 table. Community similarity was assessed by Principal Coordinate Analysis (PCoA) using the Bray-Curtis  
259 distance matrices.

260 We performed one-way ANOVAs to compare alpha and beta diversity metrics among the groups of  
261 samples by sampling locality or by treatment. Corrections based on multiple testing were performed using  
262 FDR (Benjamini & Hochberg 1995). For all analyses, the threshold significance level was set at 0.05.

## 263 TRANSCRIPTOME ANALYSIS

264 The aim of this analysis was to study the transcriptomes of the sampled colonies in response to heat stress  
265 compared with controlled conditions.

## 266 RNA EXTRACTION

267 Total RNA was extracted from each coral sample using TRIzol reagent (Invitrogen), according to the  
268 manufacturer's protocol. The quantity and integrity of the total RNA extracted was checked using an  
269 Agilent 2100 Bioanalyzer (Agilent Technologies) (mean RIN = 7.5). Paired-end fragment libraries  
270 (2 × 100 bp) were constructed and sequenced on an Illumina HiSeq 2000 platform at the Centre  
271 d'Innovation Génome Québec at McGill University, Montreal, Canada.

## 272 BIOINFORMATIC ANALYSES

273 Fastq read files were processed on the Galaxy instance of the IHPE (<http://bioinfo.univ-perp.fr>) (Giardine  
274 *et al.* 2005). Quality control and initial cleaning of the reads were performed using the filter by quality  
275 program (version 1.0.0) based on the FASTX-toolkit (Blankenberg *et al.* 2010). Reads having fewer than  
276 90% of bases having a Phred quality score  $\leq 26$  were discarded (probability of 2.5 incorrect base call out  
277 of 1000, and a base call accuracy of 99.75%). Adaptors used for sequencing were removed using the  
278 cutadapt program version 1.6 (Martin 2011). All paired-end reads were aligned using RNASTAR software  
279 under default parameters, with at least 66% of the bases being required to align to the reference, and a  
280 maximum of ten mismatches per read (Dobin *et al.* 2013). The *Pocillopora damicornis* reference genome

281 used in this study (manuscript in preparation) consisted of a draft assembly of 25,553 contigs (352 Mb  
282 total) and N50 = 171,375 bp. The resulting transcriptome served as the reference for reads mapping, and  
283 a GTF annotation file was constructed using cufflink/cuffmerge (Trapnell *et al.* 2010). HTseq was used to  
284 produce count files for genes (Anders *et al.* 2015). The DESeq2 package was used to estimate the  
285 normalized abundances of the transcripts, and to calculate differential gene expression for samples  
286 between the control temperature and the stress temperature for each locality (Love *et al.* 2014),  
287 considering the different genotypes (3 biological replicates for each genotype) and using default  
288 parameters. We next analyzed genes according to their expression patterns among localities and  
289 temperature treatments. Genes were clustered manually into six groups according to their differential  
290 expression levels: common over-expressed genes, NC-specific over-expressed genes, Om-specific over-  
291 expressed genes, common under-expressed genes, NC-specific under-expressed genes, and Om-specific  
292 under-expressed genes. Cluster 3.0 (de Hoon *et al.* 2004) and Treeview (Saldanha 2004) were used to  
293 build the heatmap.

#### 294 DISCRIMINANT ANALYSIS OF PRINCIPAL COMPONENTS (DAPC):

295 Our aim was to quantify and compare the level of genome-wide transcriptome plasticity between colonies  
296 from Om and NC in response to heat stress. To achieve this we performed a discriminant analysis of  
297 principal components (DAPC) based on a log-transformed transcript abundance matrix (containing  
298 26,600 genes) obtained from the 36 samples (i.e. 9 control and 9 stressed replicates per locality), as  
299 described previously (Kenkel & Matz 2016). Specifically, we ran a DAPC analysis using the resulting log<sub>2</sub>  
300 transformed dataset for the colonies from NC and Om reared in control conditions as predefined groups in  
301 the *adegenet* package implemented in R (Jombart *et al.* 2010). Two principal components and a single  
302 discriminant function were retained. We then predicted the position of stressed colonies from both  
303 localities (Om and NC) onto the unique discriminant function of the DAPC.

304 We next compared the absolute mean DAPC scores between Om and NC colonies for each experimental  
305 group (control versus heat stress) using the non-parametric Wilcoxon test. We also ran a general linear  
306 model (GLM) using the DAPC scores as dependent variable, and accounted for the locality of origin (NC  
307 and Om), the conditions (control and heat stress), and their interaction as explanatory variables. In  
308 particular, as an indicator of significant differences in the genome-wide gene expression reaction norms

309 (i.e. differences in DAPC scores between the control and the heat stress treatments) between Om and NC  
310 colonies we tested for significant effects of the interaction between the localities and the condition effects.

### 311 GO ENRICHMENT OF DIFFERENTIALLY EXPRESSED GENES

312 The transcriptome was annotated *de novo* using a translated nucleotide query (blastx (Altschul *et al.*  
313 1990)) against the non-redundant protein sequence database (nr). The 25 best hits were then used to  
314 search for gene ontology terms using the Blast2Go program (Conesa *et al.* 2005). Lists of significantly up-  
315 regulated and down-regulated genes were subjected to GO enrichment analysis by comparison with all  
316 expressed gene using a Fischer exact test and a FDR value of 0.05. We used REVIGO to visualize the  
317 enriched biological processes (Supek *et al.* 2011).

## 318 RESULTS

### 319 HOST HAPLOTYPE

320 Among the three colonies from New Caledonia, colonies NC2 and NC3 presented haplotype ORF18 and  
321 were assigned to Primary Species Hypothesis PSH05 and more precisely to Secondary Species Hypothesis  
322 SSH05a (Gelin *et al.* 2017a), corresponding to *P. damicornis* type  $\beta$  (Schmidt-Roach *et al.* 2013) also named  
323 *P. acuta* (Schmidt-Roach *et al.* 2013) or type 5a (Pinzon *et al.* 2013), while colony NC1 presented ORF09  
324 and was assigned to PSH04, *P. damicornis* type  $\alpha$ , *P. damicornis* or type 4a, respectively. As for colonies  
325 from Oman, they all presented ORF34 and were assigned to PSH12 (Gelin *et al.* 2017a) or type 7a (Pinzon  
326 *et al.* 2013)(Additional Table 4). These three PSHs represent three different species.

327 Furthermore, NC2 and NC3 multi-locus genotypes differed from one allele over 26 and were thus part of  
328 the same clonal lineage, i.e. the entity that groups together colonies whose multi-locus genotypes slightly  
329 differ due to somatic mutations or scoring errors.

### 330 ECOLOGICALLY REALISTIC HEAT STRESS

331 Our goal was to ensure that our experimental heat stress faithfully reflects a realistic heat stress *in natura*.  
332 Following collection from the field, the corals from the different localities were first maintained in the  
333 same controlled conditions prior to the experiment. During this period no mortality or signs of  
334 degradation/stress were observed for any of the coral colonies. During the experimental heat stress (i.e.  
335 gradual temperature increase), visual and photographic monitoring clearly indicated that the first sign of

336 coral stress (i.e. the closure of polyps) occurred at day 30 for both sampling localities, corresponding to  
337 30°C and 34°C for the NC and Om colonies, respectively. These temperatures perfectly match the warmest  
338 temperature experienced by these populations in the field (Table 1). No signs of physiological collapse  
339 were observed in control corals throughout the experiment indicating that all the other parameters were  
340 maintained optimal for coral colonies.

#### 341 BACTERIAL COMMUNITIES

342 Among the overall 42 samples analyzed, a total of 5,308,761 16S rDNA sequences were obtained after  
343 cleaning and singleton filtering corresponding to 15,211 OTUs. In all samples the class  
344 Gammaproteobacteria was dominant (77.7%), particularly the genus *Endozoicomonas* (44.7% of the  
345 sequences); this genus is known to be an endosymbiont of numerous scleractinians (Neave *et al.* 2016b)  
346 (See Additional Figure 1 for complete bacterial composition in each colony and replicate). The PCoA of  
347 Bray-Curtis distances for all colonies showed no evident clusters based on the experimental treatments  
348 (Fig. 2). We observed a loose grouping based on localities and colonies, except for colony NC1, which  
349 appeared to have a more specific microbiota composition, as it had a different grouping associated with  
350 the first axis, which explained 22.3% of the variance. This could be correlated with the different species  
351 hypotheses for NC1 compared to NC2 and NC3 (see above). The one-way ANOVA for alpha diversity  
352 (Shannon index) revealed significant differences in the microbiota diversity between localities ( $P < 0.05$ )  
353 and colonies ( $P < 0.05$ ), but no differences among the *in situ* control and stress conditions ( $P = 0.885$ ).  
354 Similar results were obtained for the beta-diversity (Bray-Curtis distance) (ANOVA between localities:  $P <$   
355  $0.05$ ; between colonies:  $P < 0.05$ ; between conditions:  $P = 0.554$ ; the ANOVA results are provided in  
356 Additional Table 2). Thus, the bacterial composition appeared to be relatively specific to each colony  
357 within each locality, but remained stable during the transition from the natural environment to artificial  
358 seawater, and during heat stress exposure.

#### 359 SYMBIODINIUM ASSEMBLAGES

360 Analysis of the *Symbiodinium* composition was performed based on an ITS2 metabarcoding, which  
361 facilitated intra-clade resolution.

362 Removal of those OTUs having an abundance of  $< 1\%$  left only 4 OTUs among all samples. Two of these  
363 corresponded to type C1, while the other two corresponded to type D1a according to (Baker 2003). Type

364 D1a was highly dominant in the colonies originating from Oman, whereas type C1 was almost exclusive to  
365 the corals from New Caledonia (Fig. 3). The *Symbiodinium* community composition was very specific to  
366 each locality, but remained stable during the transition from the natural environment to artificial  
367 seawater, and during heat stress exposure.

## 368 HOST TRANSCRIPTOME ANALYSIS

369 We generated 36 transcriptomes corresponding to triplicate samples for three colonies of each locality  
370 exposed to the control (C) and stress (S) temperatures.

371 Overall, the transcriptome sequencing of these 36 samples yielded 1,970,889,548 high quality Illumina  
372 paired reads of 100 bp. Globally, 40–64% of reads obtained for the Om colonies, and 59–70% of reads  
373 obtained for NC colonies successfully mapped to the *Pocillopora damicornis* (type  $\beta$ ) reference genome.  
374 The apparently better alignment of samples from New Caledonia most likely relies on the fact that the  
375 New Caledonia colonies used in this study belong to *P. damicornis* types  $\alpha$  or 4a (PSH04) and  $\beta$  or 5a  
376 (PSH05), which are phylogenetically close to each other and closer from the reference genome, than the  
377 Om colonies from type 7a (PSH12) that is phylogenetically more distant from the reference genome. The  
378 aligned reads were assembled in 99,571 unique transcripts (TCONS), representing putative splicing  
379 variants of 26,600 genes identified as “XLOC” in the genome (FASTA sequences available in Additional File  
380 3).

381 The hierarchical clustering analyses clearly grouped together samples belonging to the same locality and  
382 species hypothesis according to their genome-wide gene expression patterns, in link with the  
383 phylogenetic differences between the NC and Om phylotypes (Fig. 4). Within locality and species  
384 hypothesis, whenever pertinent, the transcriptomes also grouped by colony, indicating that the  
385 transcriptomes were genotype-specific. For each colony, the transcriptomes then grouped by condition  
386 (temperature treatment) excepted for New Caledonia colonies NC2 and NC3 (corresponding to the same  
387 MLL) that clustered together when exposed to controlled and heat stress conditions.

388 In total 5,287 genes were differentially expressed between colonies exposed to stress and control  
389 conditions (adjusted  $P < 0.05$ ) in Om colonies, and 1,460 genes in NC colonies (full results of the  
390 comparisons between stressed and controls (log<sub>2</sub>-foldchange and adjusted  $p$ -values) are provided in

391 Additional File 5). The heatmap generated to visualize the expression pattern of each gene in Om and NC  
392 colonies is shown in Figure 5.

393 Among these genes, 498 were over-expressed and 350 were under-expressed in colonies exposed to  
394 stressful conditions compared to those kept under optimal temperatures (i.e. control) irrespective to the  
395 locality of origin (NC or Om). Nevertheless, the differential expression level was significantly higher  
396 (Wilcoxon test;  $P = 2.2 \times 10^{-16}$ ) for the Om corals (Fig. 6). Among the 498 over-expressed genes, 358 were  
397 more induced in Om corals than the NC ones (log<sub>2</sub>-fold change Om > NC; Fig. 6), and of the 350 under-  
398 expressed genes, 259 were more repressed in Om corals (Additional Table 6). The mean of the log<sub>2</sub>-fold  
399 change for common over-expressed genes was 0.9 for Om samples vs. 0.6 for NC samples (variance: 0.6 for  
400 Om; 0.2 for NC), and for the common under-expressed genes was -1.2 for Om colonies vs. -0.8 for NC  
401 colonies (variance: 1 for Om; 0.3 for NC).

402 Additionally, colonies from the two thermal regimes also responded specifically to heat stress. In  
403 particular, 272 genes were over-expressed and 294 were under-expressed only in the NC corals and 2,082  
404 were over-expressed and 2,311 were under-expressed only in the Om ones when exposed to heat stress.  
405 Finally, the colonies from both localities displayed antagonistic transcriptomic responses to heat stress for  
406 a subset of genes: 24 were over-expressed in NC colonies but under-expressed in Om ones, while 22 were  
407 under-expressed in NC colonies but over-expressed in the Om ones.

408 Altogether these results revealed a greater transcriptomic response to heat stress in colonies originating  
409 from Oman compared to those from New Caledonia (4,393 differentially expressed genes for the Om  
410 corals vs. 566 genes for the NC ones).

#### 411 DISCRIMINANT ANALYSIS OF PRINCIPAL COMPONENTS (DAPC):

412 The DAPC analysis clearly discriminated the colonies from both localities based on their overall gene  
413 expression patterns (Fig. 7). We also found that Om and NC colonies significantly differed in their gene  
414 expression plasticity in response to heat stress (Wilcoxon tests; control  $p$ -value = 0.73, stress  $p$ -value <  
415 0.01). This result was corroborated by the significance of the interaction term between localities and  
416 temperature effects in the GLM ( $P = 0.04$ ), which indicate that the slope of the reaction norm was different  
417 between localities. More particularly, the Om colonies responded to a greater extent than the NC ones, and  
418 thus showed significantly higher gene expression plasticity in response to heat stress.

419 ANALYSIS OF GENE FUNCTION:

420 To investigate the functions associated with the differentially expressed genes we performed a blastx  
421 annotation of transcripts followed by a Gene Ontology (GO) term annotation to determine to which  
422 protein each gene (XLOC) corresponded most closely, and the biological process, molecular function, and  
423 cell compartment localization of the protein (Additional File 7). Differentially expressed genes associated  
424 with the control and stress conditions (adjusted  $p$ -value < 0.05) clustered into six groups according to  
425 their expression patterns in corals from both localities (see host transcriptome analysis section).

426 For the 498 common over-expressed genes, 139 biological processes were enriched compared with the  
427 entire set of annotated genes. The most significant biological process identified in the REVIGO analysis (i.e.  
428 with lowest FDR value: FDR =  $2.1 \times 10^{-68}$ ) was stress response (Fig. 8). Following this sequentially, were  
429 cellular metabolism (FDR =  $3.7 \times 10^{-49}$ ), positive regulation of biological processes (FDR =  $2.4 \times 10^{-43}$ ), cell  
430 death (FDR =  $2.5 \times 10^{-33}$ ), cellular localization (FDR =  $8.4 \times 10^{-25}$ ), and pigment metabolism (FDR =  $2.1 \times 10^{-21}$ ).  
431 Among the 272 genes over-expressed in the NC but not in the Om colonies in response to heat stress,  
432 38 biological processes were enriched and the REVIGO analysis showed that organic acid catabolism (FDR  
433 =  $1.6 \times 10^{-22}$ ), protein transport (FDR =  $1.8 \times 10^{-16}$ ), stress response (FDR =  $4.8 \times 10^{-13}$ ), and cellular  
434 metabolism (FDR =  $3 \times 10^{-12}$ ) were the four most significantly enriched biological processes (Fig. 8). Among  
435 the 2,082 genes over-expressed in the Om but not in the NC colonies in response to heat stress, the  
436 REVIGO analysis showed that 160 enriched biological processes grouped together, with the most  
437 significant being ncRNA metabolism (FDR =  $8.9 \times 10^{-303}$ ), cellular metabolism (FDR =  $4.4 \times 10^{-70}$ ),  
438 carbohydrate derivative biosynthesis (FDR =  $5.9 \times 10^{-64}$ ), and organic substance transport (FDR =  $2 \times 10^{-44}$ ).

439 For the 350 genes that were under-expressed following heat stress irrespective to the locality of origin  
440 (Om or NC), 48 biological processes were enriched compared with the entire set of annotated genes (Fig.  
441 8). The REVIGO analysis grouped these genes into five biological processes: nitrogen compound transport  
442 (FDR =  $5.4 \times 10^{-89}$ ), localization (FDR =  $8.1 \times 10^{-10}$ ), regulation of neurotransmitter levels (FDR =  $1.2 \times 10^{-8}$ ),  
443 system development (FDR =  $8.8 \times 10^{-6}$ ), and single organism process (FDR =  $4 \times 10^{-4}$ ). Among the under-  
444 expressed genes in the NC colonies only, a single biological process (anatomical  
445 structure/morphogenesis) was found to be enriched (FDR =  $9 \times 10^{-3}$ ). Among the under-expressed genes in  
446 the Om colonies only the REVIGO analysis grouped 139 enriched biological processes, with the most



447 significant being ion transmembrane transport (FDR =  $7.6 \times 10^{-104}$ ), single multicellular organism process  
448 (FDR =  $7.5 \times 10^{-53}$ ), regulation of biological quality (FDR =  $6 \times 10^{-48}$ ), cell-cell signaling (FDR =  $1.5 \times 10^{-23}$ ),  
449 single organism process (FDR =  $1.1 \times 10^{-18}$ ), multicellular organism process (FDR =  $1.5 \times 10^{-16}$ ), biological  
450 regulation (FDR =  $2.3 \times 10^{-15}$ ), response to abiotic stimulus (FDR =  $6.2 \times 10^{-13}$ ), and localization (FDR =  
451  $4.6 \times 10^{-12}$ ).

452 Regarding other Gene Ontology annotations, the common over-expressed genes were correlated with  
453 enhancement of 41 cellular components that were associated in the REVIGO analysis with cellular  
454 compartments including the mitochondria (FDR =  $1.5 \times 10^{-180}$ ), cells (FDR =  $1.5 \times 10^{-19}$ ), organelles (FDR =  
455  $2.5 \times 10^{-15}$ ), endomembrane systems (FDR =  $6.5 \times 10^{-7}$ ), the membrane-enclosed lumen (FDR =  $2 \times 10^{-4}$ ), the  
456 entire membrane (FDR = 0.0019), the membrane raft (FDR = 0.009), and the membrane (FDR =  $9 \times 10^{-3}$ ).  
457 The genes over-expressed in NC corals were associated in the REVIGO analysis with 23 cellular  
458 compartments, with the mitochondria (FDR =  $2.5 \times 10^{-82}$ ), cells (FDR =  $4.9 \times 10^{-7}$ ), organelles (FDR =  
459  $6.9 \times 10^{-6}$ ), and the envelope (FDR =  $9 \times 10^{-3}$ ) being the four most significant. The genes over-expressed in  
460 Om corals were associated in the REVIGO analysis with 70 cellular components, the most significant of  
461 which were the intracellular organelle lumen (FDR =  $1 \times 10^{-560}$ ), organelles (FDR =  $9.9 \times 10^{-48}$ ), cells ( $2.7 \times 10^{-$   
462  $46$ ), the membrane-enclosed lumen (FDR =  $1.2 \times 10^{-19}$ ), macromolecular complexes (FDR =  $1 \times 10^{-16}$ ), the  
463 endomembrane system (FDR =  $2.7 \times 10^{-11}$ ), the envelope (FDR =  $3 \times 10^{-9}$ ), and the membrane (FDR =  $8 \times 10^{-$   
464  $4$ ).

465 The common under-expressed genes were associated in the REVIGO analysis with 13 cellular components  
466 including the plasma membrane (FDR =  $1.1 \times 10^{-44}$ ), membrane (FDR =  $2.4 \times 10^{-11}$ ), neurons (FDR =  $3 \times 10^{-4}$ ),  
467 presynapse (FDR =  $4 \times 10^{-4}$ ), and synapse (FDR =  $7 \times 10^{-3}$ ) (Fig. 8). The genes under-expressed in NC corals  
468 were associated in the REVIGO analysis with seven biological processes in cellular components amongst  
469 which the plasma membrane region (FDR =  $8.5 \times 10^{-9}$ ), cell periphery (FDR =  $1 \times 10^{-3}$ ), the membrane (FDR  
470 =  $2 \times 10^{-3}$ ), and membrane part (FDR =  $9 \times 10^{-3}$ ) were the four most significant. The under-expressed genes  
471 in Om corals only were associated in the REVIGO analysis with 26 cellular components, the most  
472 significant of which included the integral component of the plasma membrane (FDR =  $3.1 \times 10^{-81}$ ), the  
473 periphery (FDR =  $1.2 \times 10^{-22}$ ), the membrane (FDR =  $6.2 \times 10^{-17}$ ), the transmembrane transporter complex

474 (FDR =  $1.5 \times 10^{-14}$ ), the extracellular region (FDR =  $4.5 \times 10^{-6}$ ), the cell (FDR =  $9.5 \times 10^{-6}$ ), synapses (FDR =  
475  $1.9 \times 10^{-5}$ ), and the synapse part (FDR =  $4.4 \times 10^{-5}$ ).

476 To investigate whether the supposed thermotolerant colonies in our study (i.e. the colonies from Oman)  
477 displayed a frontloading strategy, as previously described in scleractinian corals (Barshis *et al.* 2013), we  
478 compared the constitutive expression levels (i.e. in control conditions) between Om and NC colonies for  
479 those genes that were over-expressed in NC colonies (Additional File 8). This analysis showed that the  
480 basal expression level was often greater in the more thermotolerant colonies (Om). Among the 770 genes  
481 that were over-expressed in NC colonies in response to thermal stress (272 specifically and 498 in  
482 common with Om), 484 were constitutively (i.e. in the control condition) more expressed in Om than NC  
483 control conditions. Among these genes, 301 were over-expressed in the Om colonies, 20 were under-  
484 expressed in the Om colonies, and 163 were not differentially expressed between the control and stress  
485 temperature in these colonies, reflecting true frontloading based on the definition of Barshis *et al.* (2013).  
486 These three categories of genes (over-expressed, under-expressed, and frontloaded) were submitted to  
487 GO term enrichment analysis. No significant results were found for the under-expressed genes. The  
488 frontloaded genes were enriched in the biological processes cellular respiration (FDR =  $4.4 \times 10^{-23}$ ), cellular  
489 component organization (FDR = 0.002), homeostatic process (FDR = 0.005), cellular component  
490 organization or biogenesis (FDR = 0.007), cofactor metabolism (FDR = 0.009), and stress response (FDR =  
491 0.009), and in the cellular compartments including the mitochondrion (FDR =  $1.6 \times 10^{-66}$ ), envelope (FDR =  
492 0.0002), cell (FDR = 0.0002), and organelle (FDR = 0.0009). Most interestingly, for genes associated with a  
493 higher basal expression level and over-expression in the Om colonies, the most enriched biological  
494 processes included stress response (FDR =  $1.2 \times 10^{-26}$ ), pigment metabolism (FDR =  $5.1 \times 10^{-24}$ ), regulation  
495 of phosphate metabolism (FDR =  $3.2 \times 10^{-15}$ ), cellular metabolism (FDR =  $2.7 \times 10^{-11}$ ), and protein folding  
496 (FDR =  $7.3 \times 10^{-6}$ ). Among the 43 over-expressed genes involved in the response to stress in the NC  
497 colonies, 23 were frontloaded in the Om colonies.

498  
499  
500

## 501 DISCUSSION

### 502 PHYLOGENETIC CONTEXT OF ADAPTATION

503 Our aim was to study the evolution of adaptive abilities of coral colonies originating from different  
504 thermal regimes. As morphology can be misleading for species identification in scleractinians, we used a  
505 molecular approach to test the species relationships of our samples. The analysis of mitochondrial  
506 sequences indicated that, despite similar morphologies, our samples corresponded to different  
507 phylogroups. This agrees well with previous works showing the importance of cryptic lineages and  
508 morphological plasticity in the *Pocillopora* genus (Gelin *et al.* 2017a and references herein). Oman  
509 corresponds to species hypothesis PSH12 of (Gelin *et al.* 2017a) which is restricted to the Northwestern  
510 Indian Ocean. Regarding the two species hypothesis from NC, PSH05 (type  $\beta$  or 5a) is found in the Indian  
511 Ocean, the Pacific Ocean and the Red Sea and PSH04 (type  $\alpha$  or 4a) is nearly exclusively found in the  
512 Pacific Ocean (very rare in the Indian Ocean, and not found yet in Red Sea) (see Gelin *et al.* 2017a). It  
513 would be interesting to study if inside each phylogroup, different thermotolerance mechanisms are  
514 present, which would be informative on the evolution or conservation of such strategies. Conversely, the  
515 observation of a similar response to thermal stress in two different species in NC could indicate either a  
516 conserved strategy or a convergence under the same ecological conditions.

### 517 AN ECOLOGICALLY REALISTIC HEAT STRESS

518 Here we characterized and compared the response to heat stress of coral colonies collected from wild  
519 populations which were exposed to two contrasting thermal regimes. The heat stress applied in this study  
520 was ecologically realistic, since the first visual response to (i.e. polyp closure) was observed for all  
521 colonies when the gradually increasing experimental temperature reached exactly the upper temperature  
522 they are subject to *in natura* (30°C and 34°C for NC and Om corals, respectively). From a biological point of  
523 view this first result hence clearly supports that these colonies from two localities and different  
524 phylogroups within the genus *Pocillopora* are experiencing to different thermal regimes *in natura* and that  
525 they display differential ability to deal with heat stress. Moreover, the accurate control of all other  
526 seawater parameters allows us to consider that the holobiont response to the thermal treatment is  
527 specific to heat stress and not to other possible confounding effects. Any change in the holobiont is  
528 therefore a response to the heat stress and not because of disruption of the coral integrity.

## 529 SYMBIOTIC COMMUNITY: BACTERIAL AND *SYMBIODINIUM* COMPOSITION

530 For the bacterial community we identified significant differences between localities and  
531 genotypes. The microbiota composition of all samples was consistent with previous studies, showing a  
532 high proportion of Gammaproteobacteria and dominance of the symbiotic *Endozoicomonas* genus (Bourne  
533 & Munn 2005; Neave *et al.* 2016a; Peixoto *et al.* 2017). However, our results clearly demonstrate that  
534 experimental heat stress did not induce bacterial community changes in coral colonies irrespective to  
535 their locality of origin. For the *Symbiodinium* community the ITS2 metabarcoding analysis enabled intra-  
536 clade resolution (Quigley *et al.* 2014). Two distinct types of D1a and C1 clades dominated, representing  
537 most of the sequences in the Om and NC corals, respectively. Nine ITS types (A to I) have been identified in  
538 the genus *Symbiodinium* (Baker 2003). Some *Symbiodinium* strains strongly participate to the overall  
539 holobiont fitness, with type D providing tolerance to higher temperatures (Berkelmans & van Oppen  
540 2006) and C1 enhancing coral growth rates (Little *et al.* 2004). Interestingly, we found that the  
541 *Symbiodinium* type D1a is dominant in the more thermotolerant Om corals, which is consistent with the  
542 results of previous works (Berkelmans & van Oppen 2006).

543 Although the microbial community (both bacterial and *Symbiodinium*) differed between the NC  
544 and Om corals, the composition did not change during transition from the field to the artificial seawater  
545 conditions, and remained stable during the experimental temperature increase. Thus, the coral holobiont  
546 assemblage remained stable over the course of the experiment. Such stability of the microbial community  
547 during experimental heat stress was previously observed in the scleractinian *Acropora millepora*  
548 (Bellantuono *et al.* 2012b) and *A. tenuis* (Littman *et al.* 2010). Thus, our study conforms to the idea that  
549 microbial communities associated with scleractinian corals remain unchanged when the holobionts are  
550 exposed to stressful temperatures (but see (Ziegler *et al.* 2017)) but further analyses of gene expression  
551 level would be needed to assess their functional responses.

## 552 HOST TRANSCRIPTOMIC RESPONSE

553 Given the observed stability of the microbial symbiotic community during heat stress, we focused  
554 more specifically on the responses attributable to the coral host. We thus compared gene expression  
555 patterns at the qualitative and quantitative levels in Om and NC colonies in response to heat stress  
556 compared to the control condition. Altogether, our results clearly highlight that the Oman thermotolerant

557 colonies exposed to more variable thermal conditions *in natura* also display, in response to heat stress, a  
558 greater plasticity in gene expression levels than the NC thermosensitive colonies. In particular, the  
559 transcriptomic response of the Oman colonies involved a larger number of genes and among the set of  
560 genes that were differentially expressed similarly in both localities, the absolute difference in expression  
561 level of 73% of these genes being significantly higher in the Om colonies. These findings are consistent  
562 with the theoretical expectations that a more variable environment promotes the evolution of a greater  
563 plasticity (Lande 2009). Accordingly, a recent transplantation study conducted *in natura* also identified  
564 greater transcriptomic plasticity in a more thermotolerant (in-shore) population compared with an (off-  
565 shore) population inhabiting a more stable thermal habitat in the mustard hill coral *Porites astreoides*  
566 (Kenkel & Matz 2016) .

567       Importantly however, we also identified several genes whose expression is constitutively higher  
568 in the Om colonies compared to the thermosensitive NC colonies (i.e. comparing the expression levels in  
569 the control condition); a process recently called “frontloading” (Barshis *et al.* 2013). Frontloading reflects  
570 the preemptive expression of stress-response genes hence predisposing organisms to better respond to  
571 stress endured in the past. It has been proposed that the occurrence of plasticity vs. frontloading strategies  
572 may depend on the frequency of stresses relative to the typical response time of organisms, with frequent  
573 stresses promoting frontloading strategies whereas less frequent perturbations result in an increased  
574 plasticity (Kenkel & Matz 2016). Surprisingly, plasticity and frontloading are often discussed as exclusive  
575 responses (Barshis *et al.* 2013; Kenkel & Matz 2016). We hypothesized that, rather than being exclusive,  
576 plasticity and frontloading often co-occur and might also mainly depend on the regulatory pathways in  
577 which genes are involved. In particular, each strategy is expected to be selected for, only if it provides a  
578 more efficient response and a better fitness despite possible trade-offs. Our results clearly support that  
579 plasticity and frontloading indeed co-occur, specifically in the thermotolerant Om colonies experiencing a  
580 more variable thermal environment *in natura*. To tease apart the biological processes that are regulated  
581 via plasticity or frontloading in *Pocillopora* response to heat stress, we conducted an enrichment analysis.  
582 In the next section we detail the response of coral colonies at the molecular level for each main biological  
583 process identified, keeping in mind that congruency between gene expression and protein levels should be  
584 cautious (Mayfield *et al.* 2016). RNA-sequencing of eukaryotic poly-adenylated mRNA would allow in

585 principle dual analysis of *Symbiodinium* and coral host transcripts (Mayfield *et al.* 2014), but since our  
586 RNA extraction methods resulted in very few, we only focused on the host transcriptomic response.

## 587 FUNCTIONAL ANALYSES:

### 588 **RESPONSE TO STRESS:**

---

#### 589 HSPs:

---

590 Heat shock proteins (HSPs) are ubiquitous stress-induced chaperone molecules involved in protein  
591 folding and protein damage repair in most organisms (Feder & Hofmann 1999). As such, several HSPs  
592 were found to be over-expressed in colonies from both localities, whichever their thermal regime, in  
593 response to heat stress. Among these, the over-expression of Hsp70 genes was significantly more intense  
594 in the Om colonies compared to NC ones. Hsp70 is one of the most documented protein chaperones in  
595 coral heat stress response (Barshis *et al.* 2013; Haguenaer *et al.* 2013), but other forms of HSPs such as  
596 Hsp60 (Brown *et al.* 2002), Hsp90 (Carpenter *et al.* 2010), and Hsp40 (Maor-Landaw & Levy 2016) are  
597 also known to be involved in the response of these organisms. Accordingly we found that Hsp105, Hsp75,  
598 Hsp90, and Hsp71 were over-expressed only in Om corals and Hsp60 and Hsp71 showed higher basal  
599 expression levels in the Om corals. We also found that chaperones of the Hsp40 family (also known as  
600 DNAj) were also regulated in response to heat stress; three of these were over-expressed in colonies from  
601 both localities with a higher basal expression level in the Om corals, whereas five were over-expressed  
602 only in the Om corals. These proteins seem to be implicated in protein folding during early heat stress in  
603 the scleractinian *Stylophora pistillata*, and are highly expressed prior to bleaching and tissue peeling  
604 (Maor-Landaw *et al.* 2014). We also found specific Om over-expression of the pyrexia gene, which codes  
605 for a transient receptor-activated cation channel, and had been shown to protect flies from high  
606 temperatures (Lee *et al.* 2005). Together these results indicate that most genes involved in the heat shock  
607 protein pathways are plastically regulated by corals when exposed to stress with a greater response in  
608 colonies inhabiting thermally variable environment. However few HSP genes are also frontloaded in these  
609 pre-exposed colonies, in particular Hsp60 which gene is encoded in the mitochondria. This pattern is  
610 likely to reflect a more general higher mitochondrial activity in colonies accustomed to more variable  
611 and/or warmer temperatures.

612

613 REACTIVE OXYGEN SPECIES (ROS) DETOXIFICATION AND DNA REPAIR:

614 One of the first consequences of heat stress is the production of reactive oxygen species (ROS), which  
615 might cause protein, membrane and DNA damages (Kowaltowski & Vercesi 1999; Yakovleva *et al.* 2009;  
616 Jena 2012). These oxidative molecules are produced in excess by the symbionts and mitochondria during  
617 the photosynthesis and the respiration processes, respectively. Cells produce several detoxification  
618 enzymes to limit cellular damages (Weis 2008). In particular, under-expression of the calcium-binding  
619 messenger protein calmodulin is a sign of response to oxidative stress (Schallreuter *et al.* 2007; Voolstra  
620 *et al.* 2009). This protein had more isoforms that were differentially expressed in response to heat stress  
621 in Om compared to NC corals, together with one calcium calmodulin-dependent kinase. The Quinone  
622 oxidoreductases proteins are involved in the generation of ROS (Porté *et al.* 2009) and were also  
623 specifically under-expressed in Om corals in response to heat stress. Conversely, the thioredoxin gene was  
624 over-expressed in colonies from both localities, but with a higher fold change in Om corals. This enzyme  
625 detoxifies oxidized molecules and is often implicated in coral response to heat stress (DeSalvo *et al.* 2010;  
626 Maor-Landaw *et al.* 2014). Finally, polyamine oxidase is a key component of the oxidative burst in plants,  
627 and is involved in the induction of apoptosis (Yoda *et al.* 2006). Two genes, one under-expressed in Om  
628 corals and one over-expressed in NC corals, were found to be regulated in our experiment. Overall, the  
629 molecular pathway underlying ROS detoxification hence appears to be plastically regulated, with greater  
630 plasticity in the thermo-tolerant Om colonies than in the thermo-sensitive NC colonies.

631 Several genes coding for DNA repair enzymes including DNA excision repair, DNA ligase, and DNA  
632 polymerase were over-expressed in colonies from both localities when exposed to heat stress. However,  
633 among these genes, three showed higher basal expression levels and two were frontloaded in the Om  
634 colonies.

635 APOPTOSIS:

636 Among the genes differentially regulated in colonies when exposed to heat stress, many are also involved  
637 in apoptosis, a process that has been recurrently associated with coral responses to heat stress  
638 (Ainsworth *et al.* 2011; Pratlong *et al.* 2015). Among these, TNFR and TRAF genes code for receptors and  
639 receptor-associated components of the tumor necrosis factor (TNF), the latter being central in the  
640 apoptosis pathway (Ashkenazi & Dixit 1998). Five TNFR and 11 TRAF genes were specifically over-

641 expressed in the Om stressed colonies, indicating a more intense regulation of the apoptosis pathway in  
642 these thermotolerant colonies. Furthermore, four TNFs were found to be specifically under-expressed in  
643 the Om corals, whereas TNFAIP3 was specifically over-expressed in response to heat stress. It is worth  
644 stressing that the TNFAIP3 gene (TNF alpha-induced protein3) is known to inhibit the NFkB process  
645 (inflammatory response) together with apoptosis (Opipari *et al.* 1990). Moreover, Caspase8 and Caspase3  
646 were specifically over-expressed in the Om stressed corals. Caspases constitute the effector core of the  
647 apoptotic process (Nicholson & Thornberry 1997), and Caspase3 has commonly been implicated in the  
648 heat stress response in corals (Maor-Landaw & Levy 2016). This further suggests that the thermotolerant  
649 Om colonies are capable of greater regulation of apoptosis than the thermosensitive NC ones when  
650 exposed to warm temperature. Another set of 10 TNFR genes and 3 TRAF genes were found to be over-  
651 expressed in colonies from both localities, but with a higher expression level in the Om corals both in the  
652 control and the stress conditions for 10 of the 13 genes irrespective to the treatment (i.e. stress and  
653 control temperature). Fem-1 homolog B, which is involved in the apoptotic process as a death receptor-  
654 associated protein, was also constitutively higher expressed in the Om compared to the NC colonies.  
655 Together these results indicate that part of the apoptosis pathway is frontloaded in the thermotolerant  
656 Om colonies. These results echoes with previous studies showing that TNFR genes are frontloaded in the  
657 common reef-building coral *Acropora hyacinthus* (Barshis *et al.* 2013) and hence strengthen the idea that  
658 frontloading such biological pathway is an adaptive response to variable and/or warmer temperatures in  
659 corals.

#### 660 **ENERGETIC METABOLISM:**

---

#### 661 **MITOCHONDRIAL FUNCTIONS:**

---

662 The mitochondria are central to many important biological processes of their cell hosts including energy-  
663 generating respiration and can be the source of several oxidative molecules involved in apoptosis. As such,  
664 heat stress is expected to promote severe changes in the expression levels of genes involved in the  
665 mitochondrial function in all living organisms (Guderley & St-Pierre 2002). Accordingly, our enrichment  
666 analysis highlighted several mitochondrial genes (either mitochondria- or nuclear-encoded). Among  
667 those, some of them were specifically or more intensively regulated in Om corals, including genes coding  
668 for 2-oxoglutarate dehydrogenase (which catalyzes the conversion of 2-oxoglutarate to succinyl-CoA and



669 CO<sub>2</sub> in the Krebs cycle), and several monocarboxylate transporters for lactate or pyruvate, the latter being  
670 essential for the regulation of energy metabolism in the thermosensitive sea anemone *Aiptasia* (Halestrap  
671 & Meredith 2004; Lehnert *et al.* 2014). These results corroborate with the general higher gene expression  
672 plasticity observed in colonies from a population experiencing a more variable thermal regime (Om)  
673 compared to colonies from a population exposed to narrower thermal amplitudes (NC).

674         Nevertheless, several other genes that participate in energy metabolism displayed a frontloaded  
675 pattern in the Om colonies such as the succinate dehydrogenase [ubiquinone] flavo mitochondrial-like and  
676 the citrate synthase genes. Interestingly, the expression of the latter gene is often used as a reliable  
677 indication of organisms' aerobic capacity and mitochondrial density (e.g. (Rivest & Hofmann 2014;  
678 Hawkins & Warner 2017)). Thus, it is likely that the observed frontloading pattern of these mitochondrial  
679 genes (encoded in the mitochondrial genome) reflects a greater mitochondrial density in the Om  
680 compared to the NC colonies. According to the literature related to non-phototrophic symbiotic  
681 ectotherms such increase in mitochondrial density as an adaptive response to heat stress appears  
682 counterintuitive since the opposite pattern is generally observed (Pörtner 2002). However, elevated  
683 mitochondrial activity on cnidarian hosts have already been found to be associated with thermal-  
684 tolerance in corals and sea anemones (Dixon *et al.* 2015; Hawkins & Warner 2017). Hawkins & Warner  
685 (2016) suggest that such specific pattern might be at least partly explained by a decrease in symbiotic  
686 algae density resulting from heat stress. Energy metabolism in scleractinian corals is highly dependent of  
687 their symbiotic algae, which are the major source of glucose generated by photosynthesis. A partial loss of  
688 their symbiotic algal may force cnidarian hosts to increase their energy metabolism, hence requiring an  
689 increase in their mitochondrial contents, and to use heterotrophic sources of energy that can be obtained  
690 from feeding or from the use of metabolic reserve such as lipids. In this context we also observed a high  
691 level of regulation of lipid metabolism in the Om corals. The apolipo A (a constituent of lipoprotein  
692 associated with lipid dissolution) and dLp HDL-BGBP precursor (which has lipid transporter activity)  
693 genes were specifically over-expressed in the Om corals, and could facilitate the transport and  
694 assimilation of lipids.

695

696 SYMBIONT REGULATION:

697 Perturbation of energy metabolism and a decrease in the efficiency of energy production by symbiotic  
698 algae can be linked to the modulation of genes associated with symbiont maintenance. In our experiment  
699 three Rab-11 isoforms were found to be over-expressed in colonies when exposed to stress, including: one  
700 being over-expressed in colonies from both localities but with a higher fold change in the Om corals; one  
701 that occurred in NC corals while showing frontloading expression in Om corals; and one induced only in  
702 the Om corals. This recycling regulatory protein has been shown to regulate phagosomes containing  
703 *Symbiodinium* cells in the *Aiptasia-Symbiodinium* model system (Chen *et al.* 2005). Calumenin was also  
704 over-expressed in both Om and NC colonies in response to heat stress, but had a higher fold change in Om  
705 corals. This protein is known to be a signal intermediate for sym32, a signaling protein involved in  
706 symbiont recognition by the coral host (Reynolds *et al.* 2000; Schwarz & Weis 2003). In addition, three  
707 lectins exhibited differential expression in the Om corals: one was over-expressed (with a log<sub>2</sub>-fold  
708 change of 4.1) and two were under-expressed (log<sub>2</sub>-fold change of -2.8 and -2.5). It is worth stressing that  
709 lectins are key proteins involved in symbiont recognition (Wood-Charlson *et al.* 2006) and that a  
710 breakdown of this recognition may lead to the disruption of the symbiosis (Vidal-Dupiol *et al.* 2009). Thus  
711 although we did not expressly quantify the density of *Symbiodinium* algae in colonies during our  
712 experiment, our results strongly suggest that *Symbiodinium* were at least partly excluded as a response to  
713 heat stress prior to bleaching process. These results hence corroborate with those found relative to a shift  
714 in both the greater involvement in energy metabolism and resources use shift.

715 CNIDOCYTES:

716 We observed a higher level of regulation of genes involved in the functioning of cnidocytes (also known as  
717 nematocytes) in Om corals. These ectodermal cells are specific to cnidarians, and are involved in  
718 environment sensing, defense, and predation. Three cytosolic phospholipase A2 (cPLA2) genes were  
719 specifically over-expressed in Om corals. In cnidocytes, the corresponding proteins are involved in venom  
720 efficacy by promoting prey lysis (Argiolas & Pisano 1983) (Nevalainen *et al.* 2004). One MAC perforin  
721 domain-containing gene had a higher basal expression level in Om corals. This gene encodes for a  
722 membrane attack complex/perforin-domain containing protein, and is found in gland cells and  
723 nematocytes in the sea anemone *Nematostella*, suggesting a potential role in prey killing (Miller *et al.*  
724 2007). Conversely, we found under-expression in Om corals of a gigantoxin homolog, which is a cytolysin

725 (actinoporin) found abundantly in cnidocytes (Hu *et al.* 2011) (Frazão *et al.* 2012). Several polycystic  
726 kidney disease gene (PKD1 and 2) isoforms were also found to be under-expressed in the Om corals.  
727 These proteins are localized in tentacles in Hydra, and seem to be involved in cnidocyte discharge  
728 (McLaughlin 2017). These changes could have been promoted by notch signaling (with over-expression of  
729 one notch homolog 2); in cnidarians, this pathway is particularly important for cnidogenesis as shown in  
730 *Nematostella vectensis* (Marlow *et al.* 2012). Together these results clearly indicate that the Om colonies  
731 are better adapted to switch to heterotrophic nutrition in response to heat stress. Such switch could be  
732 linked to higher levels of resistance to heat stress via a decrease in *Symbiodinium* cell numbers, as  
733 described in other scleractinian corals (Hughes & Grottoli 2013; Aichelman *et al.* 2016).

734 To summarize, we found that Om colonies displayed a more plastic transcriptomic response for many  
735 genes involved in fundamental biological pathways such as stress-response pathways (e.g. HSPs,  
736 apoptosis, DNA repair, ROS management) in response to heat stress. Moreover, several genes were found  
737 to be frontloaded especially in the apoptosis as well as in the energy metabolic pathway. The latter pattern  
738 could be explained by a higher regulation of metabolic genes but could also reflect in part an increase in  
739 mitochondrial activity as already documented in other symbiotic cnidarians in response to heat stress  
740 (Rivest & Hofmann 2014). Higher plasticity and frontloading are two strategies that are costly. As  
741 expected, we found strong evidence for possible trade-offs with other critical life history traits such as  
742 growth and reproduction. In the next sections we will discuss the transcriptomic response of both Om and  
743 NC colonies in response to stress at molecular pathways associated with central fitness traits.

#### 744 **MORPHO-ANATOMIC PROCESSES AND REPRODUCTION:**

---

##### 745 **SKELETON AND MUSCLE CELLS:**

---

746 Some enzymes potentially involved in the calcification and muscle contraction were under-expressed in  
747 response to heat stress in Om corals, in particular, a single chain carbonic anhydrase and four carbonic  
748 anhydrase genes (1, 2, 7, and 12). Carbonic anhydrases catalyze the interconversion of CO<sub>2</sub> and water to  
749 bicarbonate and protons, enabling maintenance of the acid-base balance (Tashian 1989). In scleractinian  
750 corals, carbonic anhydrases are also involved in biomineralization processes involved in skeleton  
751 formation (Bertucci *et al.* 2013). Two hephaestin genes were also under-expressed following heat stress in  
752 Om corals. These copper-dependent ferroxidases were identified in the skeleton of *Acropora millepora*

753 (Vulpe *et al.* 1999), where they can be involved in the incorporation and regulation of iron in the  
754 carbonate skeleton (Ramos-Silva *et al.* 2013). Several myosin related proteins similar to myosin light  
755 chain kinase or myosin regulatory light polypeptide 9 were found to be specifically under-expressed in the  
756 Om corals. Actin-binding LIM partial, potentially involved in Z-disk activity of muscles, and several genes  
757 having the LIM domain were also found to be under-expressed in Om corals. In eumetazoans including  
758 cnidarians, these proteins are involved in regulation of muscle activity (for a review, see (Leclère &  
759 Röttinger 2016). In addition, the genes for the acetyl choline receptor “43 kDa receptor-associated of the  
760 synapse-like” and the “calcium-activated potassium channel subunit beta-like” proteins, both of which  
761 down-regulate muscle contraction, were over-expressed in Om colonies, which is in accordance with a  
762 global decrease in functioning of the contractile apparatus. The observed down-regulation of skeleton  
763 formation and muscle contraction strongly suggest that mounting a higher –and most likely better–  
764 transcriptomic response to heat stress is associated with a decrease energy allocation to crucial fitness  
765 traits and particularly to growth in scleractinian corals.

#### 766 NERVOUS SYSTEM:

767 Many genes involved in nervous system functioning were differentially regulated, with some being over-  
768 expressed (e.g. neuronal acetylcholine receptor and VWFA, which regulate the calcium dependent voltage  
769 chain), and others being under-expressed, including a proton myo-inositol cotransporter, SCO-spondin  
770 (axon guidance), sodium- and chloride-dependent GABA and taurine transporters (neurotransmission),  
771 sodium-dependent phosphate transport 2B, and synaptotagmin. Many transcription factors that could be  
772 involved in morpho-anatomic integrity, including numerous forkhead box homologs implicated in cell  
773 growth, proliferation, and differentiation were over-expressed in Om corals. All these may be involved  
774 more globally in the regulation of morpho-anatomic processes (muscle contraction, cnidocytes).

#### 775 CIRCADIAN CLOCK / REPRODUCTION:

776 Several photoreceptors were differentially expressed in the corals. A cryptochrome gene was frontloaded  
777 in Om colonies. These flavoproteins are found in plants, animals, insects, and cnidarians, and in corals it  
778 has been shown that cryptochrome can synchronize the circadian clock and the reproductive system  
779 (Reitzel *et al.* 2013). Three melatonin receptors were also found to be regulated in response to heat stress  
780 in Om corals (two over-expressed and one under-expressed). As in vertebrates, in which melatonin is well  
781 characterized, in cnidarians it is also involved in the circadian clock (Peres *et al.* 2014). Similarly, two

782 under-expressed and three over-expressed opsin-like genes were identified. The protein is a homolog of  
783 the photoreceptor melanopsin, and in *Acropora* is involved in circadian cycle regulation (Vize 2009).

784 Taken together, changes in morpho-anatomic regulation and perturbations in circadian cycles and  
785 reproduction could also reflect a trade-off mechanism in the stress response of Om colonies, which is  
786 consistent with greater plasticity, and intensive and not fully specific gene regulation activity. We believe  
787 that our study contribute to a better comprehension of the biological processes involved in coral  
788 thermotolerance. In particular we highlighted the molecular pathways that were regulated either via  
789 frontloading or plasticity or both. We also detected clear transcriptomic evidence that allocating energy in  
790 heat stress response to better cope with higher temperatures is at the expense of other crucial biological  
791 processes such as growth and reproductive functions. However, the molecular mechanisms underlying  
792 such global response to heat stress are still partly unresolved. Interestingly we also found specific gene  
793 expression patterns linked with epigenetic regulation that could give new insights into our  
794 comprehension of such mechanisms and these are exposed and discussed in the next and last section.

#### 795 **EPIGENETIC PROCESSES:**

---

796 Two histone acetyltransferase genes were over-expressed in Om corals. These enzymes, which  
797 are also found in *Nematostella*, are involved in epigenetic gene regulation by modifying the nucleosome  
798 structure, and thus the transcription of genes (Sterner & Berger 2000; Karmodiya *et al.* 2014). Several  
799 histone-lysine N-methyltransferases were also identified, five of which were under-expressed (four  
800 PRDM6 and one setd3 isoform) and three of which were over-expressed in Om corals. As with histone  
801 acetyltransferase, these enzymes are involved in gene expression regulation through their influence on  
802 chromatin structure (Huang 2002; Vervoort *et al.* 2016). One lymphoid-specific helicase-like (HELLS)  
803 gene was frontloaded in Om corals. This protein is known to participate in epigenetic processes, and  
804 interacts with DNMT1 (cytosine methyl-transferase) for the maintenance of *de novo* methylation (Myant  
805 *et al.* 2011; Dabe *et al.* 2015). We identified under-expression of two SID-1 transmembrane family  
806 member genes involved in dsRNA regulation (Li *et al.* 2015). Many reverse transcriptase homologues,  
807 including RNA-directed DNA polymerase from a jockey-like mobile element, were differentially expressed  
808 or more intensely regulated during heat stress in the Om corals. These reverse transcriptases are typical  
809 of the retro-transposon activity known to be activated or less controlled during general stress (Wessler

810 1996). The loss of inhibition of retro-transposon activity may reflect a trade-off with more specific  
811 functions, but could also be a “SOS-like” survival mechanism. Indeed, in a threatening environment a high  
812 transposition activity may induce mutations in polyps with potential genomic changes, which could fuel  
813 rapid adaptive evolution (Maumus *et al.* 2009).

## 814 CONCLUSION:

815 Comparison of the response to an ecologically realistic heat stress of corals from the same genus but  
816 pertaining to different phylogroups thriving in two contrasting thermal environments sheds light on the  
817 molecular basis of thermotolerance. We found that during heat exposure the symbiotic community  
818 composition was stable in colonies from both thermal environments, but we identified in coral hosts  
819 major differences in gene regulation processes. The more thermotolerant colonies displayed (i) a more  
820 plastic transcriptome response involving more differentially expressed genes and higher fold expression  
821 changes; and (ii) a constitutive and higher level of expression for a range of genes (frontloaded genes). In  
822 the context of climate change, which is predicted to cause abnormal and rapid temperature increase  
823 (Change 2014), phenotypic plasticity and the capacity for rapid adaptation through epigenetic regulation  
824 and/or genetic assimilation could increase the probability of coral survival. Previous studies highlighted  
825 the importance of reef managements measures (Rogers *et al.* 2015) and assisted evolution (van Oppen *et al.*  
826 *et al.* 2015), but also underlined the importance of preserving standing genetic/epigenetic variation in wild  
827 coral populations (Matz *et al.* 2017). Our results also suggest that management measures must include  
828 protection of natural thermotolerant populations having the potential to resist increasing thermal  
829 anomalies. Although the molecular mechanisms we described are most likely largely shared in this group  
830 of scleractinians, the question remains as to whether these more thermotolerant genotypes are secured in  
831 different phylogroups as was the case here, or whether they also exist inside more closely related  
832 phylogroups where they could circulate via long range gene flow. (Mumby *et al.* 2011). It is however  
833 essential to keep in mind that even the most thermotolerant reefs may bleach if they are exposed to  
834 temperature significantly higher to their own norm (Hughes *et al.* 2017b; Le Nohaïc *et al.* 2017).

835

## 836 ACKNOWLEDGEMENTS

837 We are thankful to Dr. Madjid Delghandi from the Center of Marine Biotechnology at Sultan Qaboos  
838 University, the Al-Hail field station and the central laboratory of the College of Agricultural and Marine  
839 Sciences for providing us with necessary equipment during field work in Oman. We acknowledge Dr Gilles  
840 Le Moullac and Dr Yannick Gueguen from the Centre Ifremer du Pacifique for providing us aquaculture  
841 facilities during sampling. We also thank the Genotoul bioinformatics platform, and the Toulouse Midi-  
842 Pyrenees and Sigeneae group for providing help and computing resources (Galaxy instance; [http://sigeneae-](http://sigeneae-workbench.toulouse.inra.fr)  
843 [workbench.toulouse.inra.fr](http://sigeneae-workbench.toulouse.inra.fr) as well as the TECNOVIV platform (University of Perpignan) and  
844 bioinformatics service. This project was funded by the ADACNI program of the French national research  
845 agency (ANR) (project no. ANR-12-ADAP-0016; <http://adacni.imbe.fr>) and the Campus France PHC  
846 program Maïmonide-Israel. This work is a contribution to the Labex OT-Med (n° ANR-11-LABX-0061)  
847 funded by the ANR “Investissements d’Avenir” program through the A\*MIDEX project (n° ANR-11-IDEX-  
848 0001-02).

## 849 DATA ACCESSIBILITY

850 The datasets generated and analyzed during the current study have been submitted to the SRA repository  
851 under bioproject number PRJNA399069 (to be released upon publication).

## 852 AUTHORS' CONTRIBUTIONS

853 JVD, MA, DA, GM, and ET were involved in the study concept and design. KBR, LF, MC, MA, PR and JVD  
854 were involved in the collection of samples. All authors were involved in data acquisition and analyses.  
855 KBR, JVD, GM, OR and ET drafted the manuscript, and all authors contributed to critical revisions and  
856 approved the final manuscript.

857

858

859

860

861

862

863 **TABLES**

864 Table 1: Sea Surface Temperature (SST) regimes to which the colonies sampled in this study (i.e. Oman  
865 and New Caledonia) are exposed in their natural environments. Thermal regime descriptors were  
866 compiled from weekly mean sea surface temperature data collected from the Integrated Global Ocean  
867 Services System Products Bulletin (i.e. IGOSS: <http://iridl.ldeo.columbia.edu/SOURCES/IGOSS/>) for  
868 quadrats of 1° longitude X 1° latitude and from 1982 to the year of sampling (2013-2014).

|                                  | New<br>Caledonia | Oman |
|----------------------------------|------------------|------|
| Mean SST (°C)                    | 24.8             | 27.9 |
| Variance (°C)                    | 2.7              | 9.5  |
| Min SST (°C)                     | 22.6             | 22.1 |
| Max SST (°C)                     | 27.1             | 33.2 |
| Mean SST of 3 warmer months (°C) | 26.8             | 31.3 |
| Mean SST of 3 cooler months (°C) | 22.8             | 23.8 |

869

870 **FIGURE LEGENDS**

871 FIGURE 1: The ecologically realistic heat stress experiment: from mean temperatures of the warmer  
872 months *in natura* to a pre-bleaching physiological state. The arrows represent points at which nubbins  
873 were collected for analyzing the microbial composition and the transcriptomic response of the host.

874 FIGURE 2: Principal coordinate analysis plot for Bray-Curtis distances of the bacterial composition of each  
875 colony in each experimental condition. Different colors represent different colonies, the circles represent  
876 the *in situ* conditions, the triangles represent the control conditions, and the squares represent the stress  
877 conditions.

878 FIGURE 3: Composition of the *Symbiodinium* community in each colony *in situ* and in controlled and  
879 stressful experimental conditions.



880 FIGURE 4: Hierarchical clustering analyses performed using DESeq2 rlog-normalized RNA-seq data for the  
881 36 transcriptomes: two conditions (control and heat stress); three replicates per condition for each  
882 colony; three colonies per locality; and two localities [Oman (Om, i.e. thermotolerant) and New Caledonia  
883 (NC; thermosensitive)]. The color (from white to dark blue) indicates the distance metric used for  
884 clustering (dark blue corresponds to the maximum correlation values).

885 FIGURE 5: Heatmap for significant differential gene expression in at least one comparison. Each gene is  
886 represented by a line.

887 FIGURE 6: Scatterplot of the log<sub>2</sub>-fold changes in gene expression in response to heat stress in the Om  
888 colonies (y-axis) vs. the NC colonies (x-axis) for the 848 genes that were over-expressed (498 genes) or  
889 under-expressed (350 genes) in colonies from both localities. The line represents the y=x line depicting  
890 similar responses between colonies.

891 FIGURE 7: Colony level gene expression variation in response to heat stress, based on DAPC analysis. The  
892 x axis is the first discriminant function of the DAPC along which the overall gene expression difference  
893 between colonies at both experimental conditions (stress and control) and from both localities (NC and  
894 Om) was maximized. This indicates the degree of similarity between the transcriptomes. The density plots  
895 obtained for NC and Om colonies are represented in blue and green, respectively. Dark and light density  
896 plots correspond to samples from the control and stress experimental conditions. The arrows above the  
897 density plots represent the direction of the mean change in the gene expression profiles.

898 FIGURE 8: Summary of the GO enrichment analysis following REVIGO synthesis. Each enriched biological  
899 process is represented by a bar proportional to the log<sub>10</sub>(FDR). The colors correspond to the three  
900 categories of genes (common: black; Om-specific: grey; NC-specific: white) that were over-expressed (left  
901 panel) or under-expressed (right panel).

## 902 ADDITIONAL FILES

903 Additional Figure 1. Bacterial class composition (for the 24 most abundant) within each replicate for the  
904 Om and NC colonies, the three colonies of each locality, and three experimental conditions per colony. *In*  
905 *situ* (dark arrows); control temperature (green arrows); stress temperature (red arrows).

906 Additional Table 2: ANOVA results for alpha diversity (Shannon index) and beta diversity (Bray-Curtis  
907 distance) between localities, colonies, or experimental conditions.

908 Additional File 3: List and sequences of the 26,600 genes (XLOC) generated during RNAseq alignment.

909 Additional Table 4: Haplotype analysis of the six sampled colonies with microsatellite genotyping for the  
910 colonies from New Caledonia.

911 Additional File 5: DEseq2 results for the log<sub>2</sub>-foldchanges, and adjusted *p* values between stress and  
912 control conditions for each locality.

913 Additional Table 6: Comparison between the log<sub>2</sub>-foldchange in Om and NC colonies for genes  
914 differentially under-expressed or over-expressed in the same way in colonies from both localities.

915 Additional File 7: GO enrichment results for biological processes, molecular functions, and cellular  
916 compartments for common, New Caledonia-specific, or Oman-specific over-expressed and under-  
917 expressed genes.

918 Additional File 8: Frontloaded genes in Oman corals among genes over-expressed in New Caledonia  
919 corals.

920

921

## 922 REFERENCES:

- 923 Adjeroud M, Guérécheau A, Vidal-Dupiol J *et al.* (2013) Genetic diversity, clonality and connectivity in the  
924 scleractinian coral *Pocillopora damicornis*: a multi-scale analysis in an insular, fragmented reef  
925 system. *Marine Biology*, **161**, 531–541.
- 926 Aichelman HE, Townsend JE, Courtney TA *et al.* (2016) Heterotrophy mitigates the response of the  
927 temperate coral *Oculina arbuscula* to temperature stress. *Ecology and Evolution*, **6**, 6758–6769.
- 928 Ainsworth TD, Wasmund K, Ukani L *et al.* (2011) Defining the tipping point: a complex cellular life/death  
929 balance in corals in response to stress. *Scientific Reports*, **1**, 160.
- 930 Altschul SF, Gish W, Miller W, Myers EW, Lipman DJ (1990) Basic local alignment search tool. *Journal of*  
931 *molecular biology*, **215**, 403–410.
- 932 Anders S, Pyl PT, Huber W (2015) HTSeq--a Python framework to work with high-throughput sequencing  
933 data. *Bioinformatics*, **31**, 166–169.
- 934 Argiolas A, Pisano JJ (1983) Facilitation of phospholipase A2 activity by mastoparans, a new class of mast  
935 cell degranulating peptides from wasp venom. *The Journal of biological chemistry*, **258**, 13697–13702.
- 936 Ashkenazi A, Dixit VM (1998) Death receptors: signaling and modulation. *Science (New York, N.Y.)*, **281**,  
937 1305–1308.
- 938 Baker AC (2003) Flexibility and specificity in coral-algal symbiosis: diversity, ecology, and biogeography  
939 of Symbiodinium. *Annual Review of Ecology*.
- 940 Barnosky AD, Matzke N, Tomiya S *et al.* (2011) Has the Earth's sixth mass extinction already arrived?  
941 *Nature ...*, **471**, 51–57.
- 942 Barshis DJ, Barshis DJ, Ladner JT *et al.* (2013) From the Cover: Genomic basis for coral resilience to climate  
943 change. *Proceedings of the National Academy of Sciences*, **110**, 1387–1392.
- 944 Bellantuono AJ, Granados-Cifuentes C, Miller DJ *et al.* (2012a) Coral Thermal Tolerance: Tuning Gene  
945 Expression to Resist Thermal Stress. *PLoS one*, **7**, e50685.
- 946 Bellantuono AJ, Hoegh-Guldberg O, Rodriguez-Lanetty M (2012b) Resistance to thermal stress in corals  
947 without changes in symbiont composition. *Proceedings. Biological sciences*, **279**, 1100–1107.
- 948 Bellwood DR, Hughes TP, Folke C, Nyström M (2004) Confronting the coral reef crisis. *Nature ...*, **429**, 827–  
949 833.
- 950 Benjamini Y, Hochberg Y (1995) Controlling the false discovery rate: a practical and powerful approach to  
951 multiple testing. *Journal of the royal statistical society Series B (...)*
- 952 Berkelmans R, van Oppen MJH (2006) The role of zooxanthellae in the thermal tolerance of corals: a  
953 “nugget of hope” for coral reefs in an era of climate change. *Proceedings of the Royal Society B-*  
954 *Biological Sciences*, **273**, 2305–2312.
- 955 Bertucci A, Moya A, Tambutte S *et al.* (2013) Carbonic anhydrases in anthozoan corals-A review.  
956 *Bioorganic & medicinal chemistry*, **21**, 1437–1450.
- 957 Blankenberg D, Gordon A, Kuster Von G *et al.* (2010) Manipulation of FASTQ data with Galaxy.  
958 *Bioinformatics*, **26**, 1783–1785.
- 959 Bordenstein SR, Theis KR (2015) Host Biology in Light of the Microbiome: Ten Principles of Holobionts  
960 and Hologenomes (MK Waldor, Ed.). *PLoS biology*, **13**, e1002226.
- 961 Bourne DG, Munn CB (2005) Diversity of bacteria associated with the coral *Pocillopora damicornis* from  
962 the Great Barrier Reef. *Environmental microbiology*, **7**, 1162–1174.
- 963 Brown BE, Downs CA, Dunne RP, Gibb SW (2002) Exploring the basis of thermotolerance in the reef coral  
964 *Goniastrea aspera*. *Marine Ecology Progress Series*, **242**, 119–129.
- 965 Carpenter LW, Patterson MR, Bromage ES (2010) Water flow influences the spatiotemporal distribution of  
966 heat shock protein 70 within colonies of the scleractinian coral *Montastrea annularis* (Ellis and  
967 Solander, 1786) following heat stress: Implications for coral bleaching. *Journal of Experimental*  
968 *Marine Biology and Ecology*, **387**, 52–59.
- 969 Change IPOC (2014) *Climate Change 2014: Impacts, Adaptation and Vulnerability*.
- 970 Chen M-C, Hong M-C, Huang Y-S *et al.* (2005) ApRab11, a cnidarian homologue of the recycling regulatory  
971 protein Rab11, is involved in the establishment and maintenance of the Aiptasia-Symbiodinium  
972 endosymbiosis. *Biochemical and biophysical research communications*, **338**, 1607–1616.
- 973 Coles SL, Riegl BM (2013) Thermal tolerances of reef corals in the Gulf: a review of the potential for  
974 increasing coral survival and adaptation to climate change through assisted translocation. *Marine*  
975 *Pollution Bulletin*, **72**, 323–332.
- 976 Conesa A, Conesa A, Gotz S *et al.* (2005) Blast2GO: a universal tool for annotation, visualization and  
977 analysis in functional genomics research. *Bioinformatics*, **21**, 3674–3676.

- 978 Cróquer A, Bastidas C, Elliott A, Sweet M (2013) Bacterial assemblages shifts from healthy to yellow band  
979 disease states in the dominant reef coral *Montastraea faveolata*. *Environmental Microbiology Reports*,  
980 **5**, 90–96.
- 981 Dabe EC, Sanford RS, Kohn AB, Bobkova Y, Moroz LL (2015) DNA Methylation in Basal Metazoans: Insights  
982 from Ctenophores. *Integrative and Comparative Biology*, **55**, 1096–1110.
- 983 de Hoon MJL, Imoto S, Nolan J, Miyano S (2004) Open source clustering software. *Bioinformatics*, **20**,  
984 1453–1454.
- 985 DeSalvo MK, Sunagawa S, Fisher PL *et al.* (2010) Coral host transcriptomic states are correlated with  
986 Symbiodinium genotypes. *Molecular Ecology*, **19**, 1174–1186.
- 987 Dixon GB, Davies SW, Aglyamova GA *et al.* (2015) CORAL REEFS. Genomic determinants of coral heat  
988 tolerance across latitudes. *Science (New York, N.Y.)*, **348**, 1460–1462.
- 989 Escudíé F, Auer L, Bernard M *et al.* (2015) FROGS : Find Rapidly OTUs with Galaxy. *The environmental  
990 genomics Conference, Montpellier, France*.
- 991 Feder ME, Hofmann GE (1999) Heat-shock proteins, molecular chaperones, and the stress response:  
992 evolutionary and ecological physiology. *Annual Review of Physiology*, **61**, 243–282.
- 993 Flot J-F, Tillier S (2007) The mitochondrial genome of *Pocillopora* (Cnidaria: Scleractinia) contains two  
994 variable regions: the putative D-loop and a novel ORF of unknown function. *Gene*, **401**, 80–87.
- 995 Frazão B, Vasconcelos V, Antunes A (2012) Sea anemone (Cnidaria, Anthozoa, Actiniaria) toxins: an  
996 overview. *Marine drugs*, **10**, 1812–1851.
- 997 Giardine B, Giardine B, Riemer C *et al.* (2005) Galaxy: A platform for interactive large-scale genome  
998 analysis. *Genome Research*, **15**, 1451–1455.
- 999 Guderley H, St-Pierre J (2002) Going with the flow or life in the fast lane: contrasting mitochondrial  
1000 responses to thermal change. *The Journal of experimental biology*, **205**, 2237–2249.
- 1001 Guerrero R, Margulis L, Berlanga M (2013) Symbiogenesis: the holobiont as a unit of evolution.  
1002 *International Microbiology*, **16**, 133–143.
- 1003 Haguenaer A, Zuberer F, Ledoux J-B, Aurelle D (2013) Adaptive abilities of the Mediterranean red coral  
1004 *Corallium rubrum* in a heterogeneous and changing environment: from population to functional  
1005 genetics. *Journal of Experimental Marine Biology and Ecology*, **449**, 349–357.
- 1006 Halestrap AP, Meredith D (2004) The SLC16 gene family—from monocarboxylate transporters (MCTs) to  
1007 aromatic amino acid transporters and beyond. *Pflugers Archiv : European journal of physiology*, **447**,  
1008 619–628.
- 1009 Hawkins TD, Warner ME (2017) Warm preconditioning protects against acute heat-induced respiratory  
1010 dysfunction and delays bleaching in a symbiotic sea anemone. *The Journal of experimental biology*,  
1011 **220**, 969–983.
- 1012 Hernandez-Agreda A, Gates RD, Ainsworth TD (2016) Defining the Core Microbiome in Corals' Microbial  
1013 Soup. *Trends in Microbiology*.
- 1014 Hoegh-Guldberg O, Mumby PJ, Hooten AJ *et al.* (2007) Coral reefs under rapid climate change and ocean  
1015 acidification. *Science (New York, N.Y.)*, **318**, 1737–1742.
- 1016 Hu B, Guo W, Wang L-H *et al.* (2011) Purification and characterization of gigantoxin-4, a new actinoporin  
1017 from the sea anemone *Stichodactyla gigantea*. *International journal of biological sciences*, **7**, 729–739.
- 1018 Huang S (2002) Histone methyltransferases, diet nutrients and tumour suppressors. *Nature Reviews  
1019 Cancer*, **2**, 469–476.
- 1020 Hughes AD, Grottoli AG (2013) Heterotrophic compensation: a possible mechanism for resilience of coral  
1021 reefs to global warming or a sign of prolonged stress? *PloS one*, **8**, e81172.
- 1022 Hughes TP, Baird AH, Bellwood DR *et al.* (2003) Climate change, human impacts, and the resilience of  
1023 coral reefs. *Science (New York, N.Y.)*, **301**, 929–933.
- 1024 Hughes TP, Barnes ML, Bellwood DR *et al.* (2017a) Coral reefs in the Anthropocene. *Nature ...*, **546**, 82–90.
- 1025 Hughes TP, Kerry JT, Álvarez-Noriega M *et al.* (2017b) Global warming and recurrent mass bleaching of  
1026 corals. *Nature ...*, **543**, 373–377.
- 1027 Hume BCC, D'Angelo C, Smith EG *et al.* (2015) Symbiodinium thermophilum sp. nov., a thermotolerant  
1028 symbiotic alga prevalent in corals of the world's hottest sea, the Persian/Arabian Gulf. *Scientific  
1029 Reports*, **5**, 8562.
- 1030 Jena NR (2012) DNA damage by reactive species: Mechanisms, mutation and repair. *Journal of biosciences*,  
1031 **37**, 503–517.
- 1032 Jombart T, Devillard S, Balloux F (2010) Discriminant analysis of principal components: a new method for  
1033 the analysis of genetically structured populations. *BMC genetics*, **11**, 94.
- 1034 Karmodiya K, Anamika K, Muley V *et al.* (2014) Camello, a novel family of Histone Acetyltransferases that

- 1035 acetylate histone H4 and is essential for zebrafish development. *Scientific Reports*, **4**, 6076.
- 1036 Kenkel CD, Matz MV (2016) Gene expression plasticity as a mechanism of coral adaptation to a variable  
1037 environment. *Nature Ecology & Evolution*, **1**, 0014.
- 1038 Kenkel CD, Meyer E, Matz MV (2013) Gene expression under chronic heat stress in populations of the  
1039 mustard hill coral ( *Porites astreoides*) from different thermal environments. *Molecular Ecology*, **22**,  
1040 4322–4334.
- 1041 Klindworth A, Pruesse E, Schweer T *et al.* (2012) Evaluation of general 16S ribosomal RNA gene PCR  
1042 primers for classical and next-generation sequencing-based diversity studies. *Nucleic Acids Research*,  
1043 **41**, e1–e1.
- 1044 Kowaltowski AJ, Vercesi AE (1999) Mitochondrial damage induced by conditions of oxidative stress. *Free  
1045 radical biology & medicine*, **26**, 463–471.
- 1046 Lajeunesse TC, Trench RK (2000) Biogeography of two species of Symbiodinium (Freudenthal) inhabiting  
1047 the intertidal sea anemone *Anthopleura elegantissima* (Brandt). *The Biological bulletin*, **199**, 126–  
1048 134.
- 1049 Lande R (2009) Adaptation to an extraordinary environment by evolution of phenotypic plasticity and  
1050 genetic assimilation. *Journal of Evolutionary Biology*, **22**, 1435–1446.
- 1051 Le Nohaïc M, Ross CL, Cornwall CE *et al.* (2017) Marine heatwave causes unprecedented regional mass  
1052 bleaching of thermally resistant corals in northwestern Australia. *Scientific Reports*, **7**, 14999.
- 1053 Leclère L, Röttinger E (2016) Diversity of Cnidarian Muscles: Function, Anatomy, Development and  
1054 Regeneration. *Frontiers in cell and developmental biology*, **4**, 157.
- 1055 Lee Y, Lee Y, Lee J *et al.* (2005) Pyrexia is a new thermal transient receptor potential channel endowing  
1056 tolerance to high temperatures in *Drosophila melanogaster*. *Nature Genetics*, **37**, 305–310.
- 1057 Lehnert EM, Mouchka ME, Burriesci MS *et al.* (2014) Extensive differences in gene expression between  
1058 symbiotic and aposymbiotic cnidarians. *G3&#58; Genes/Genomes/Genetics*, **4**, 277–295.
- 1059 Li J, Chen Q, Long L-J *et al.* (2014) Bacterial dynamics within the mucus, tissue and skeleton of the coral  
1060 *Porites lutea* during different seasons. *Scientific Reports*, **4**, 7320.
- 1061 Li W, Koutmou KS, Leahy DJ, Li M (2015) Systemic RNA Interference Deficiency-1 (SID-1) Extracellular  
1062 Domain Selectively Binds Long Double-stranded RNA and Is Required for RNA Transport by SID-1.  
1063 *The Journal of biological chemistry*, **290**, 18904–18913.
- 1064 Little AF, van Oppen MJH, Willis BL (2004) Flexibility in algal endosymbioses shapes growth in reef corals.  
1065 *Science (New York, N.Y.)*, **304**, 1492–1494.
- 1066 Littman R, Bourne DG, Willis BL (2010) Responses of coral-associated bacterial communities to heat  
1067 stress differ with Symbiodinium type on the same coral host. *Molecular Ecology*, **19**, 1978–1990.
- 1068 Love MI, Huber W, Anders S (2014) Moderated estimation of fold change and dispersion for RNA-seq data  
1069 with DESeq2. *Genome biology*, **15**, 31.
- 1070 Magoč T, Salzberg SL (2011) FLASH: fast length adjustment of short reads to improve genome assemblies.  
1071 *Bioinformatics*.
- 1072 Mahé F, Rognes T, Quince C, De Vargas C, Dunthorn M (2014) Swarm: robust and fast clustering method  
1073 for amplicon-based studies. *PeerJ*, **2**, e593.
- 1074 Maor-Landaw K, Levy O (2016) Gene expression profiles during short-term heat stress; branching vs.  
1075 massive Scleractinian corals of the Red Sea. *PeerJ*, **4**, e1814.
- 1076 Maor-Landaw K, Karako-Lampert S, Waldman Ben-Asher H *et al.* (2014) Gene expression profiles during  
1077 short-term heat stress in the red sea coral *Stylophora pistillata*. *Global Change Biology*, **20**, 3026–  
1078 3035.
- 1079 Margulis L, Fester R (1991) *Symbiosis as a Source of Evolutionary Innovation*. MIT Press.
- 1080 Marlow H, Roettinger E, Boekhout M, Martindale MQ (2012) Functional roles of Notch signaling in the  
1081 cnidarian *Nematostella vectensis*. *Developmental biology*, **362**, 295–308.
- 1082 Martin M (2011) Cutadapt removes adapter sequences from high-throughput sequencing reads. *EMBnet  
1083 journal*, **17**, 10.
- 1084 Maumus F, Allen AE, Mhiri C *et al.* (2009) Potential impact of stress activated retrotransposons on genome  
1085 evolution in a marine diatom. *BMC Genomics*, **10**, 624.
- 1086 Mayfield AB, Wang L-H, Tang P-C *et al.* (2011) Assessing the impacts of experimentally elevated  
1087 temperature on the biological composition and molecular chaperone gene expression of a reef coral.  
1088 (S Maas, Ed.). *PloS one*, **6**, e26529.
- 1089 Mayfield AB, Wang Y-B, Chen C-S, Lin C-Y, Chen S-H (2014) Compartment-specific transcriptomics in a  
1090 reef-building coral exposed to elevated temperatures. *Molecular Ecology*, **23**, 5816–5830.
- 1091 Mayfield AB, Wang Y-B, Chen C-S, Chen S-H, Lin C-Y (2016) Dual-compartmental transcriptomic +

- 1092 proteomic analysis of a marine endosymbiosis exposed to environmental change. *Molecular Ecology*,  
1093 25, 5944–5958.
- 1094 Mayfield AB, Chen Y-J, Lu C-Y, Chen C-S (2018) The proteomic response of the reef coral *Pocillopora acuta*  
1095 to experimentally elevated temperatures. (H Lanz-Mendoza, Ed.). *PloS one*, 13, e0192001.
- 1096 McFall-Ngai M, Hadfield MG, Bosch TC *et al.* (2013) Animals in a bacterial world, a new imperative for the  
1097 life sciences. *Proceedings of the National Academy of Sciences of the United States of America*, **110**,  
1098 3229–3236.
- 1099 McLaughlin S (2017) Evidence that polycystins are involved in Hydra cnidocyte discharge. *Invertebrate*  
1100 *neuroscience : IN*, **17**, 1.
- 1101 McMurdie PJ, Holmes S (2013) phyloseq: An R Package for Reproducible Interactive Analysis and Graphics  
1102 of Microbiome Census Data (M Watson, Ed.). *PloS one*, **8**, e61217.
- 1103 Meyer JL, Gunasekera SP, Scott RM, Paul VJ, Teplitski M (2015) Microbiome shifts and the inhibition of  
1104 quorum sensing by Black Band Disease cyanobacteria. *The ISME Journal*, **10**, 1204–1216.
- 1105 Miller DJ, Hemmrich G, Ball EE *et al.* (2007) The innate immune repertoire in cnidaria--ancestral  
1106 complexity and stochastic gene loss. *Genome biology*, **8**, R59.
- 1107 Mumby PJ, Elliott IA, Eakin CM *et al.* (2011) Reserve design for uncertain responses of coral reefs to  
1108 climate change. *Ecology Letters*, **14**, 132–140.
- 1109 Myant K, Termanis A, Sundaram AYM *et al.* (2011) LSH and G9a/GLP complex are required for  
1110 developmentally programmed DNA methylation. *Genome Research*, **21**, 83–94.
- 1111 Neave MJ, Apprill A, Ferrier-Pages C, Voolstra CR (2016a) Diversity and function of prevalent symbiotic  
1112 marine bacteria in the genus *Endozoicomonas*. *Applied microbiology and biotechnology*, **100**, 8315–  
1113 8324.
- 1114 Neave MJ, Rachmawati R, Xun L *et al.* (2016b) Differential specificity between closely related corals and  
1115 abundant *Endozoicomonas* endosymbionts across global scales. *The ISME Journal*, **11**, 186–200.
- 1116 Nevalainen TJ, Peuravuori HJ, Quinn RJ *et al.* (2004) Phospholipase A2 in cnidaria. *Comparative*  
1117 *biochemistry and physiology. Part B, Biochemistry & molecular biology*, **139**, 731–735.
- 1118 Nicholson DW, Thornberry NA (1997) Caspases: killer proteases. *Trends in biochemical sciences*, **22**, 299–  
1119 306.
- 1120 Oliver TA, Palumbi SR (2010) Many corals host thermally resistant symbionts in high-temperature  
1121 habitat. *Coral Reefs*, **30**, 241–250.
- 1122 Oipari AW, Boguski MS, Dixit VM (1990) The A20 cDNA induced by tumor necrosis factor alpha encodes a  
1123 novel type of zinc finger protein. *The Journal of biological chemistry*, **265**, 14705–14708.
- 1124 Palumbi SR, Barshis DJ, Traylor-Knowles N, Bay RA (2014) Mechanisms of reef coral resistance to future  
1125 climate change. *Science (New York, N.Y.)*, **344**, 895–898.
- 1126 Pantos O, Bongaerts P, Dennis PG, Tyson GW, Hoegh-Guldberg O (2015) Habitat-specific environmental  
1127 conditions primarily control the microbiomes of the coral *Seriatopora hystrix*. *The ISME Journal*, **9**,  
1128 1916–1927.
- 1129 Peixoto RS, Rosado PM, Leite DC de A, Rosado AS, Bourne DG (2017) Beneficial Microorganisms for Corals  
1130 (BMC): Proposed Mechanisms for Coral Health and Resilience. *Frontiers in Microbiology*, **8**, 100.
- 1131 Peres R, Reitzel AM, Passamanek Y *et al.* (2014) Developmental and light-entrained expression of  
1132 melatonin and its relationship to the circadian clock in the sea anemone *Nematostella vectensis*.  
1133 *EvoDevo*, **5**, 26.
- 1134 Polato NR, Voolstra CR, Schnetzer J *et al.* (2010) Location-specific responses to thermal stress in larvae of  
1135 the reef-building coral *Montastraea faveolata*. *PloS one*, **5**, e11221.
- 1136 Porté S, Valencia E, Yakovtseva EA *et al.* (2009) Three-dimensional structure and enzymatic function of  
1137 proapoptotic human p53-inducible quinone oxidoreductase PIG3. *The Journal of biological chemistry*,  
1138 **284**, 17194–17205.
- 1139 Pörtner HO (2002) Climate variations and the physiological basis of temperature dependent  
1140 biogeography: systemic to molecular hierarchy of thermal tolerance in animals. *Comparative*  
1141 *biochemistry and physiology. Part A, Molecular & integrative physiology*, **132**, 739–761.
- 1142 Pratlong M, Haguenaer A, Chabrol O *et al.* (2015) The red coral (*Corallium rubrum*) transcriptome: a new  
1143 resource for population genetics and local adaptation studies. *Molecular ecology resources*, **15**, 1205–  
1144 1215.
- 1145 Quigley KM, Quigley KM, Davies SW *et al.* (2014) Deep-Sequencing Method for Quantifying Background  
1146 Abundances of Symbiodinium Types: Exploring the Rare Symbiodinium Biosphere in Reef-Building  
1147 Corals. *PloS one*, **9**, e94297.
- 1148 Ramos-Silva P, Kaandorp J, Huisman L *et al.* (2013) The skeletal proteome of the coral *Acropora millepora*:

- 1149 the evolution of calcification by co-option and domain shuffling. *Molecular Biology and Evolution*, **30**,  
1150 2099–2112.
- 1151 Reaka-Kudla ML (2005) The global biodiversity of coral reefs: a comparison with rain forests.
- 1152 Reitzel AM, Tarrant AM, Levy O (2013) Circadian clocks in the cnidaria: environmental entrainment,  
1153 molecular regulation, and organismal outputs. *Integrative and Comparative Biology*, **53**, 118–130.
- 1154 Reusch TBH (2013) Climate change in the oceans: evolutionary versus phenotypically plastic responses of  
1155 marine animals and plants. *Evolutionary Applications*, **7**, 104–122.
- 1156 Reynolds WS, Schwarz JA, Weis VM (2000) Symbiosis-enhanced gene expression in cnidarian-algal  
1157 associations: cloning and characterization of a cDNA, sym32, encoding a possible cell adhesion  
1158 protein. *Comparative biochemistry and physiology. Part A, Molecular & integrative physiology*, **126**, 33–  
1159 44.
- 1160 Riegl BM, Purkis SJ, Al-Cibahy AS, Abdel-Moati MA, Hoegh-Guldberg O (2011) Present Limits to Heat-  
1161 Adaptability in Corals and Population-Level Responses to Climate Extremes (CR Voolstra, Ed.). *PloS*  
1162 *one*, **6**, e24802.
- 1163 Rivest EB, Hofmann GE (2014) Responses of the Metabolism of the Larvae of *Pocillopora damicornis* to  
1164 Ocean Acidification and Warming (HG Dam, Ed.). *PloS one*, **9**, e96172.
- 1165 Rogers A, Harborne AR, Brown CJ *et al.* (2015) Anticipative management for coral reef ecosystem services  
1166 in the 21st century. *Global Change Biology*, **21**, 504–514.
- 1167 Rognes T, Flouri T, Nichols B, Quince C, Mahé F (2016) VSEARCH: a versatile open source tool for  
1168 metagenomics. *PeerJ*.
- 1169 Rohwer F, Seguritan V, Azam F (2002) Diversity and distribution of coral-associated bacteria. *Marine*  
1170 *Ecology Progress ...*
- 1171 Rosenberg E, Koren O, Reshef L, Efrony R, Zilber-Rosenberg I (2007) The role of microorganisms in coral  
1172 health, disease and evolution. *Nature Reviews Microbiology*, **5**, 355–362.
- 1173 Saldanha AJ (2004) Java Treeview--extensible visualization of microarray data. *Bioinformatics*, **20**, 3246–  
1174 3248.
- 1175 Sato Y, Willis BL, Bourne DG (2009) Successional changes in bacterial communities during the  
1176 development of black band disease on the reef coral, *Montipora hispida*. *The ISME Journal*, **4**, 203–  
1177 214.
- 1178 Schallreuter KU, Gibbons NCJ, Zothner C, Abou Elloof MM, Wood JM (2007) Hydrogen peroxide-mediated  
1179 oxidative stress disrupts calcium binding on calmodulin: more evidence for oxidative stress in  
1180 vitiligo. *Biochemical and biophysical research communications*, **360**, 70–75.
- 1181 Schwarz JA, Weis VM (2003) Localization of a symbiosis-related protein, Sym32, in the *Anthopleura*  
1182 *elegantissima*-*Symbiodinium muscatinei* Association. *The Biological bulletin*, **205**, 339–350.
- 1183 Sterner DE, Berger SL (2000) Acetylation of histones and transcription-related factors. *Microbiology and*  
1184 *Molecular Biology Reviews*, **64**, 435–459.
- 1185 Suggett DJ, Warner ME, Leggat W (2017) Symbiotic Dinoflagellate Functional Diversity Mediates Coral  
1186 Survival under Ecological Crisis. *Trends in Ecology & Evolution*, **32**, 735–745.
- 1187 Supek F, Bošnjak M, Škunca N, Šmuc T (2011) REVIGO summarizes and visualizes long lists of gene  
1188 ontology terms. *PloS one*, **6**, e21800.
- 1189 Tashian RE (1989) The carbonic anhydrases: widening perspectives on their evolution, expression and  
1190 function. *BioEssays*, **10**, 186–192.
- 1191 Theis KR, Dheilly NM, Klassen JL *et al.* (2016) Getting the Hologenome Concept Right: an Eco-Evolutionary  
1192 Framework for Hosts and Their Microbiomes (JA Gilbert, Ed.). *mSystems*, **1**, e00028–16.
- 1193 Torda G, Donelson JM, Aranda M *et al.* (2017) Rapid adaptive responses to climate change in corals. *Nature*  
1194 *Climate Change*, **7**, 627–636.
- 1195 Trapnell C, Williams BA, Pertea G *et al.* (2010) Transcript assembly and quantification by RNA-Seq reveals  
1196 unannotated transcripts and isoform switching during cell differentiation. *Nature Biotechnology*, **28**,  
1197 511–515.
- 1198 van Oppen MJH, Oliver JK, Putnam HM, Gates RD (2015) Building coral reef resilience through assisted  
1199 evolution. *Proceedings of the National Academy of Sciences*, **112**, 2307–2313.
- 1200 van Woesik R, Sakai K, Ganase A, Loya Y (2011) Revisiting the winners and the losers a decade after coral  
1201 bleaching. *Marine Ecology Progress Series*, **434**, 67–76.
- 1202 Veron JEN, Stafford-Smith M (2000) *Corals of the world*. Sea Challengers.
- 1203 Vervoort M, Meulemeester D, Béhague J, Kerner P (2016) Evolution of Prdm Genes in Animals: Insights  
1204 from Comparative Genomics. *Molecular Biology and Evolution*, **33**, 679–696.
- 1205 Vidal-Dupiol J, Adjeroud M, Roger E *et al.* (2009) Coral bleaching under thermal stress: putative

- 1206 involvement of host/symbiont recognition mechanisms. *BMC physiology*, **9**, 14.
- 1207 Vize PD (2009) Transcriptome analysis of the circadian regulatory network in the coral *Acropora*
- 1208 *millepora*. *The Biological bulletin*, **216**, 131–137.
- 1209 Voolstra CR, Schnetzer J, Peshkin L *et al.* (2009) Effects of temperature on gene expression in embryos of
- 1210 the coral *Montastraea faveolata*. *BMC Genomics*, **10**, 627.
- 1211 Vulpe CD, Kuo YM, Murphy TL *et al.* (1999) Hephaestin, a ceruloplasmin homologue implicated in
- 1212 intestinal iron transport, is defective in the sla mouse. *Nature Genetics*, **21**, 195–199.
- 1213 Weis VM (2008) Cellular mechanisms of Cnidarian bleaching: stress causes the collapse of symbiosis. *The*
- 1214 *Journal of experimental biology*, **211**, 3059–3066.
- 1215 Wessler SR (1996) Turned on by stress. Plant retrotransposons. *Current biology : CB*, **6**, 959–961.
- 1216 Wood-Charlson EM, Hollingsworth LL, Krupp DA, Weis VM (2006) Lectin/glycan interactions play a role in
- 1217 recognition in a coral/dinoflagellate symbiosis. *Cellular Microbiology*, **8**, 1985–1993.
- 1218 Yakovleva IM, Baird AH, Yamamoto HH *et al.* (2009) Algal symbionts increase oxidative damage and death
- 1219 in coral larvae at high temperatures.
- 1220 Yoda H, Hiroi Y, Sano H (2006) Polyamine oxidase is one of the key elements for oxidative burst to induce
- 1221 programmed cell death in tobacco cultured cells. *Plant physiology*, **142**, 193–206.
- 1222 Ziegler M, Seneca FO, Yum LK, Palumbi SR, Voolstra CR (2017) Bacterial community dynamics are linked
- 1223 to patterns of coral heat tolerance. *Nature Communications*, **8**, 14213.
- 1224 Zilber-Rosenberg I, Rosenberg E (2008) Role of microorganisms in the evolution of animals and plants:
- 1225 the hologenome theory of evolution. *FEMS Microbiology Reviews*, **32**, 723–735.

1226



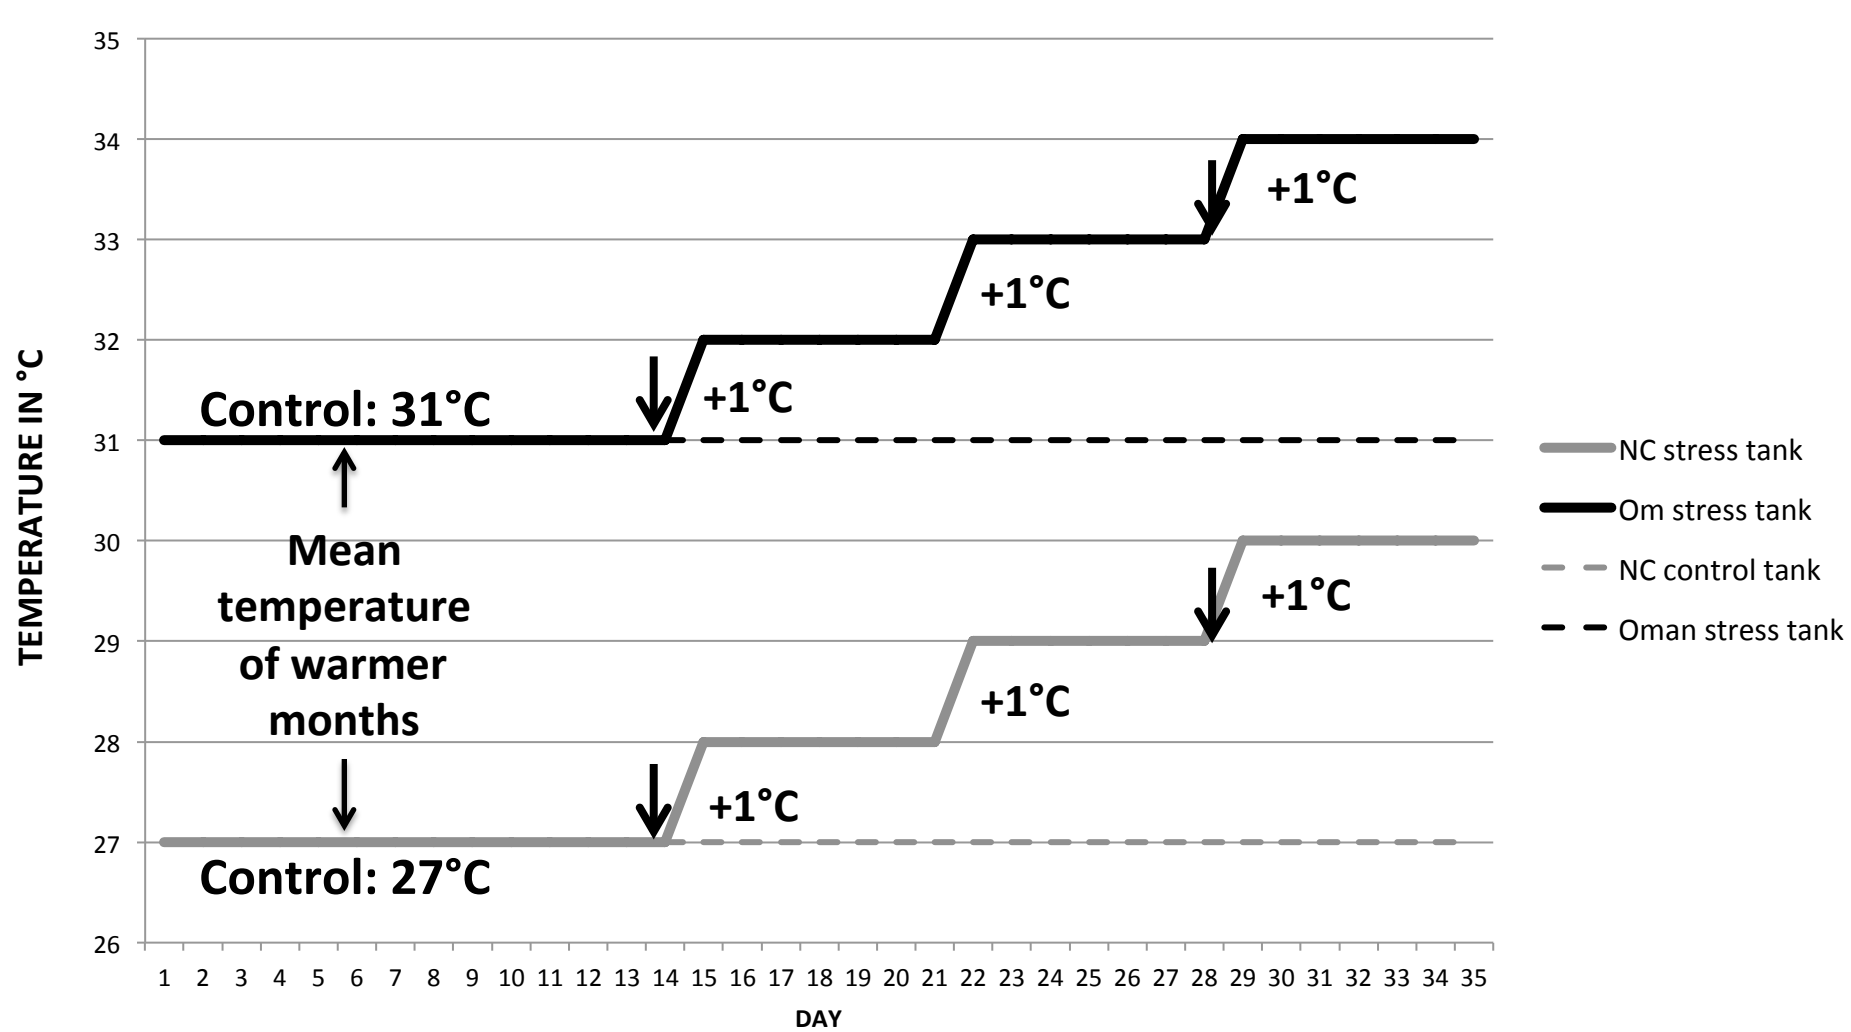

## MDS + BC

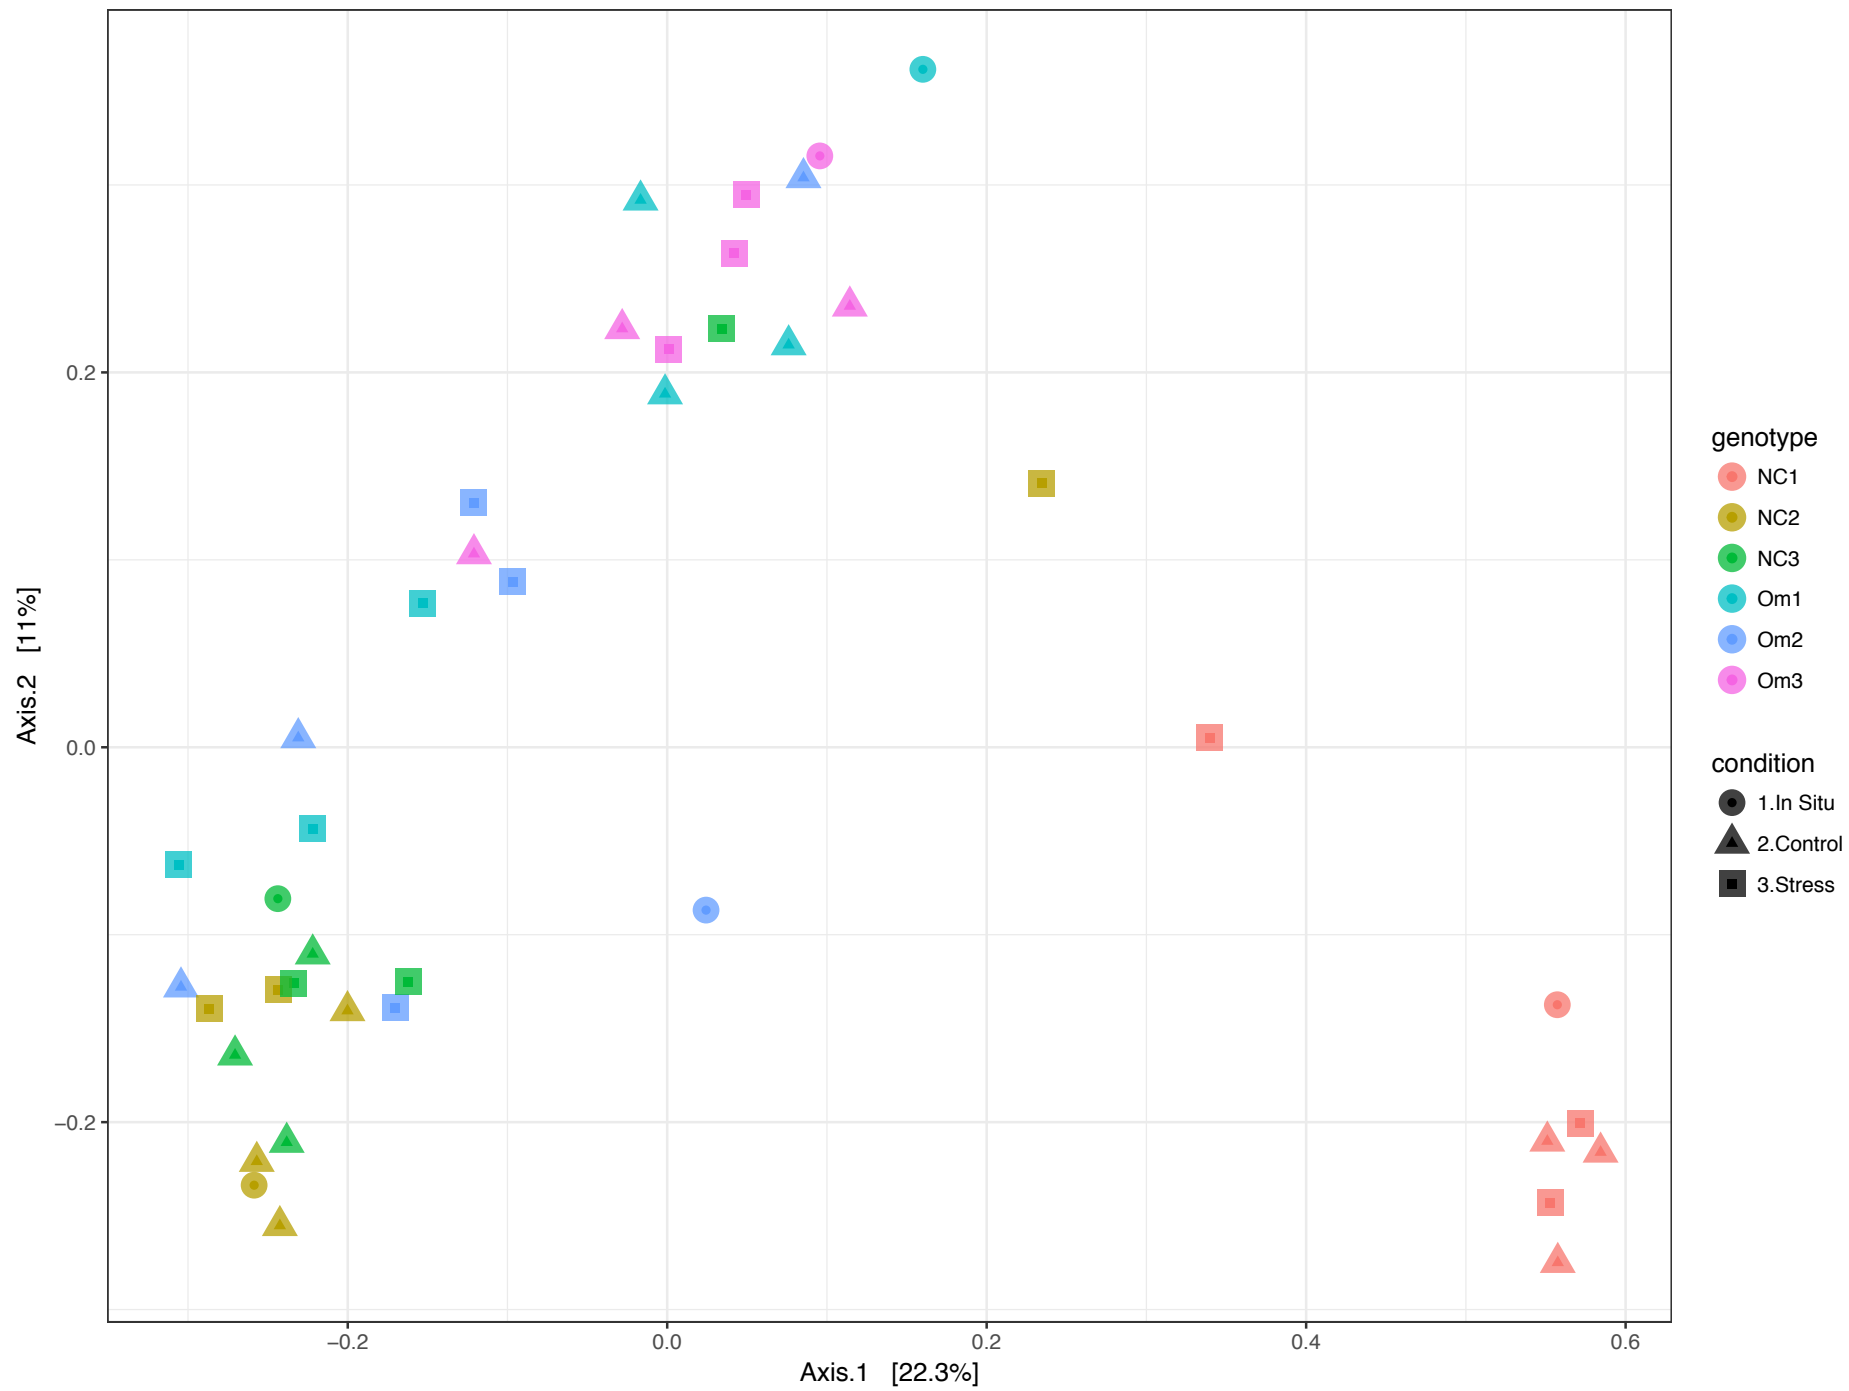

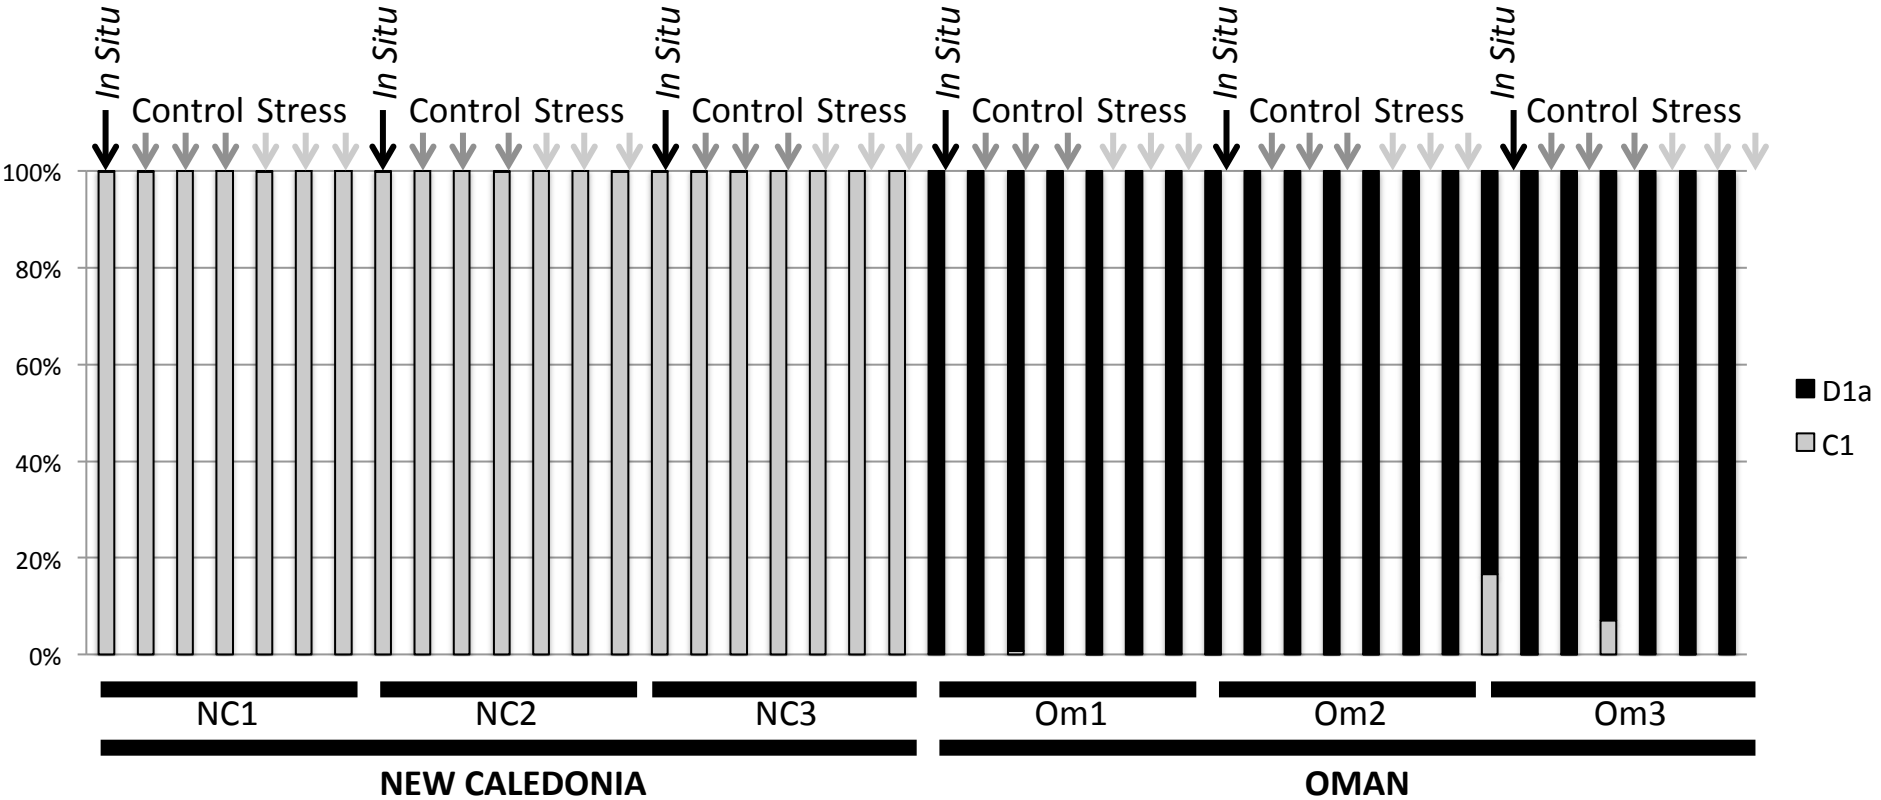

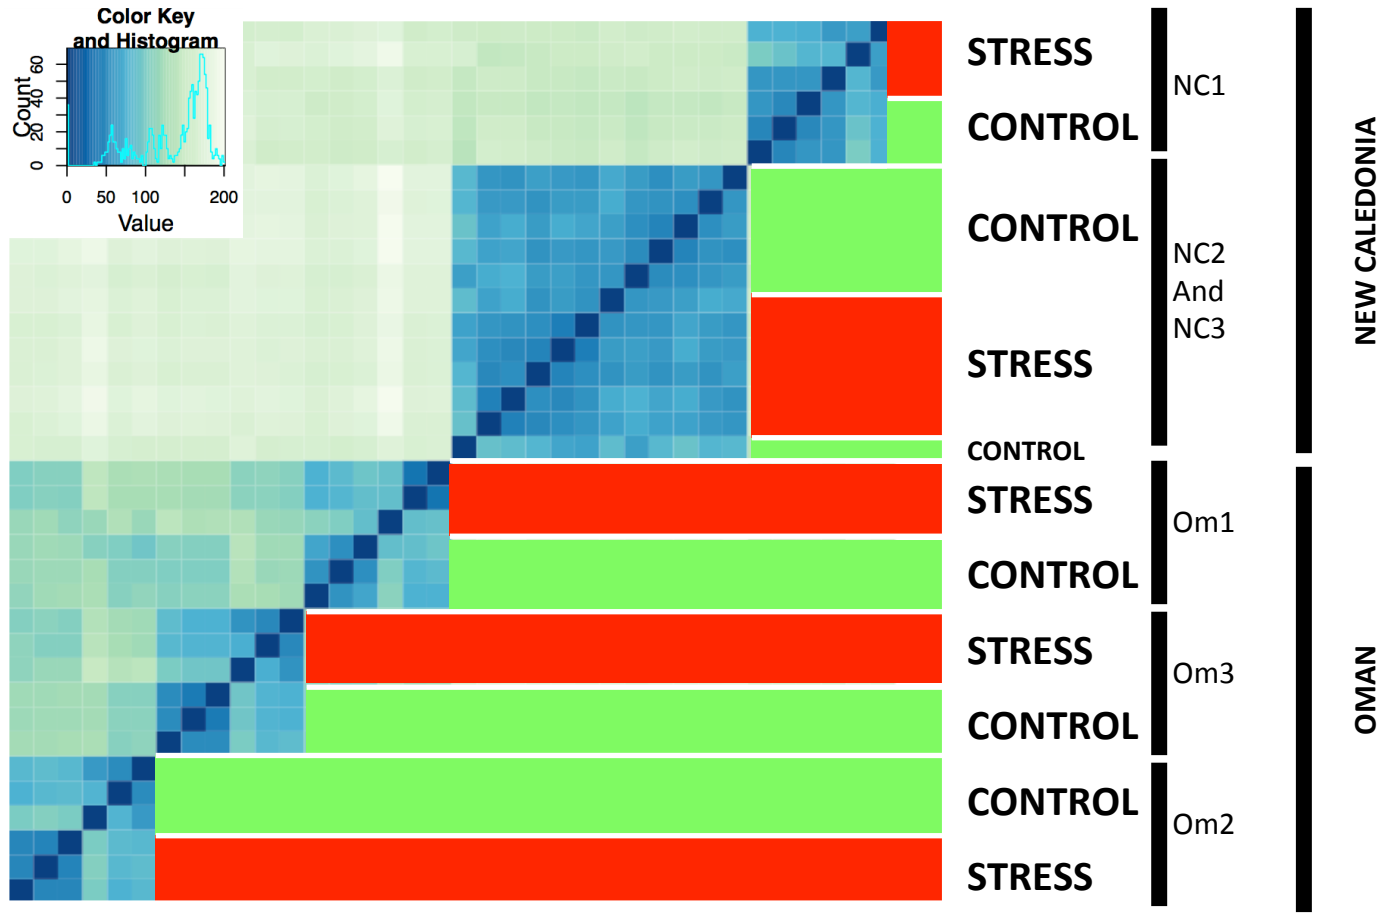

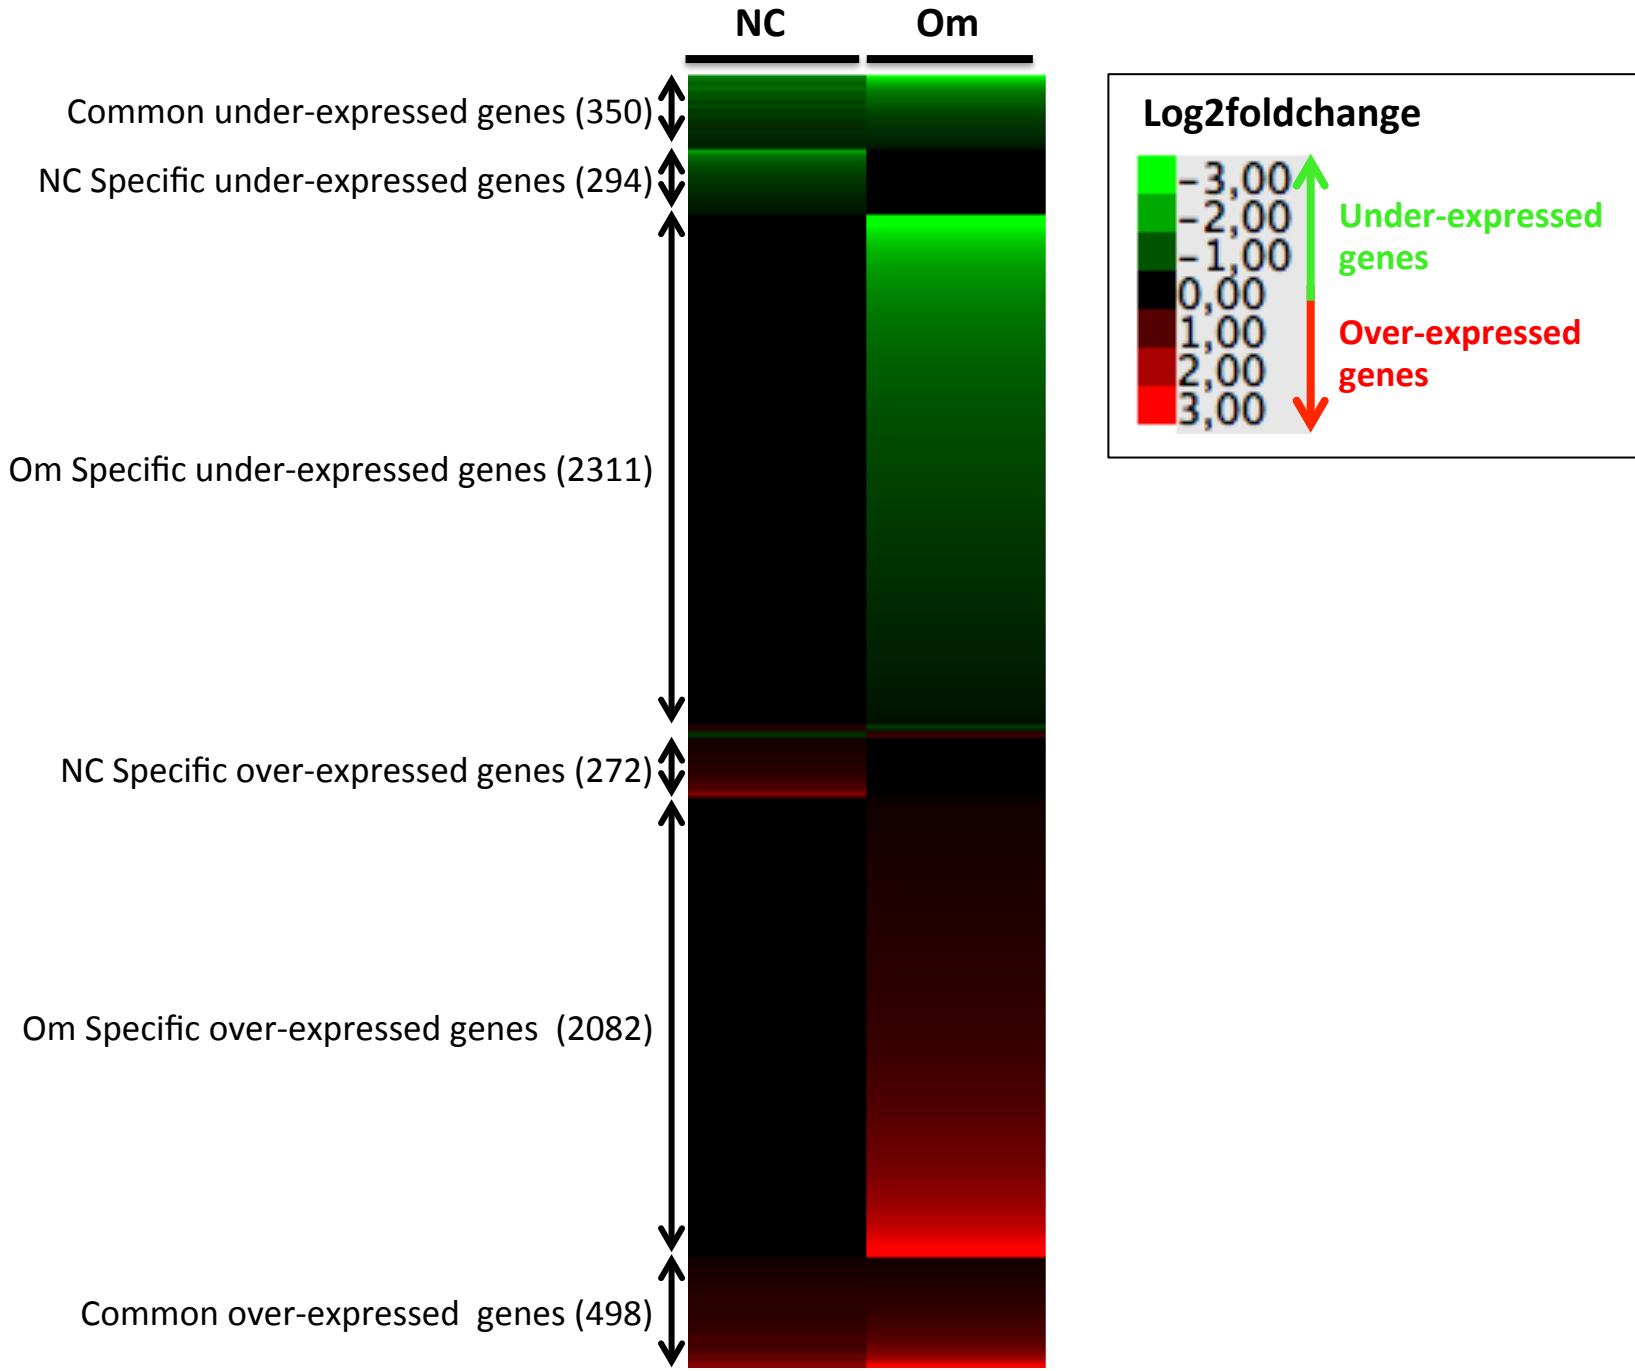

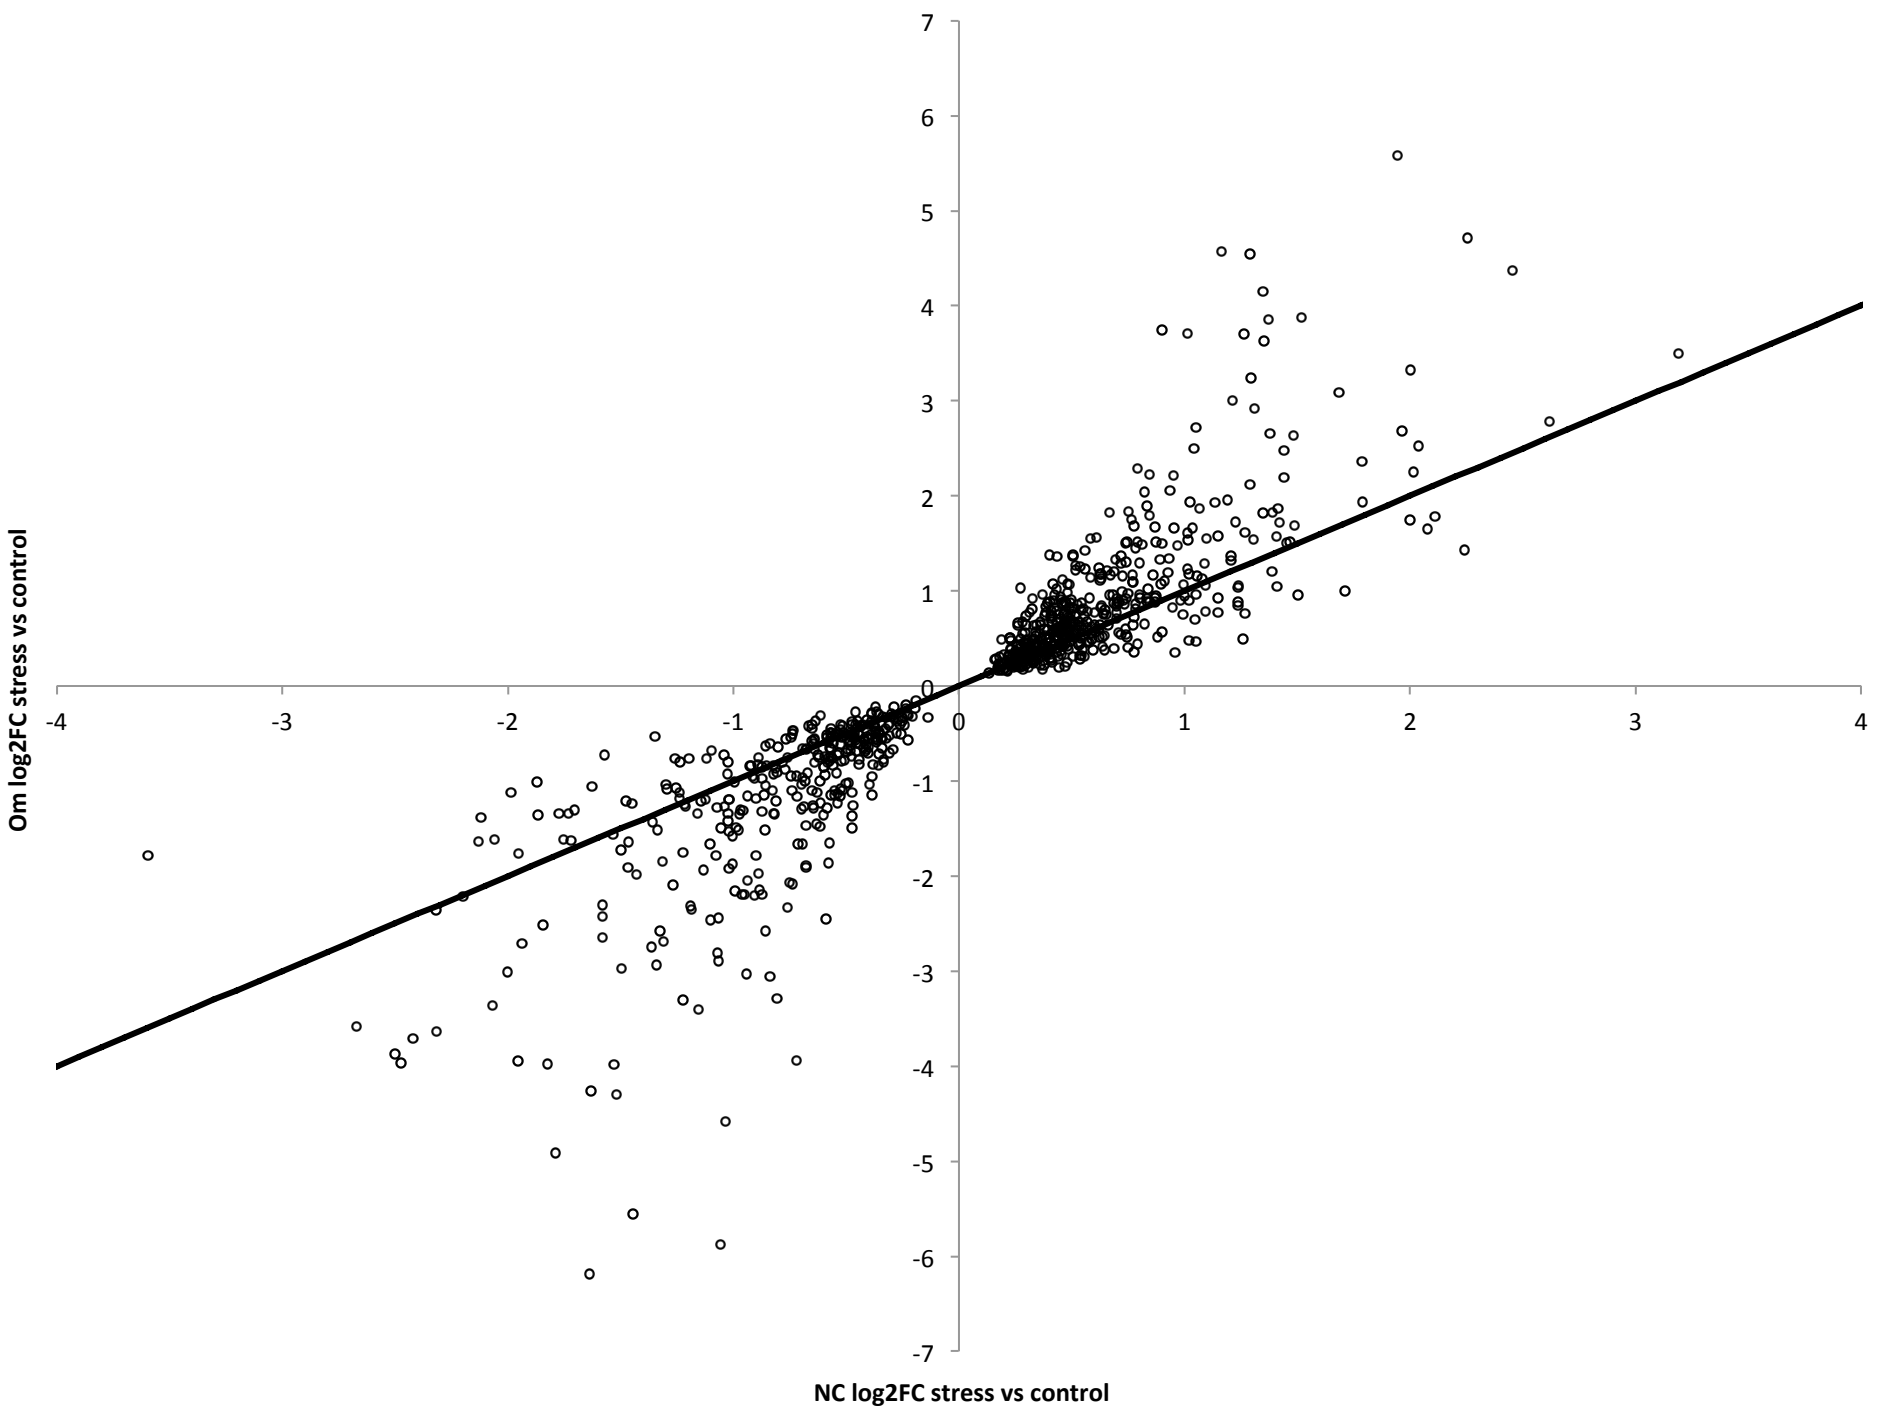

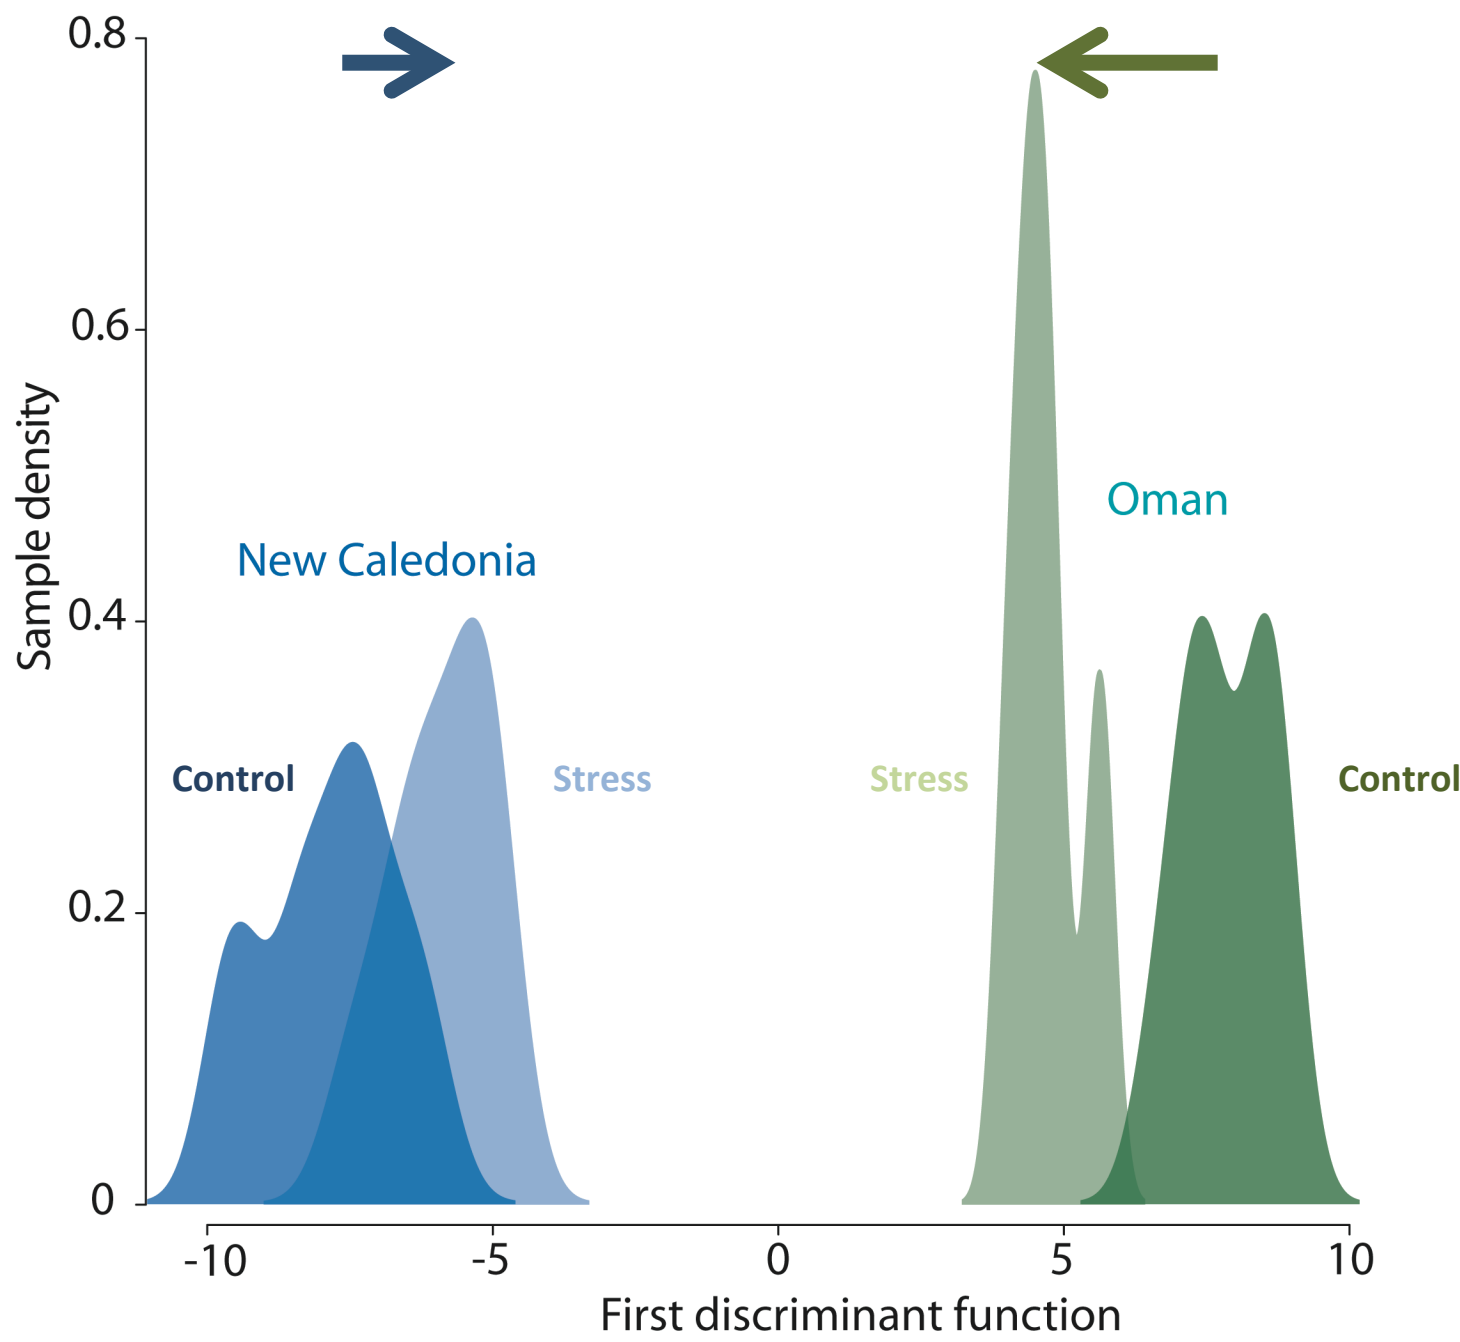

## Over-expressed genes

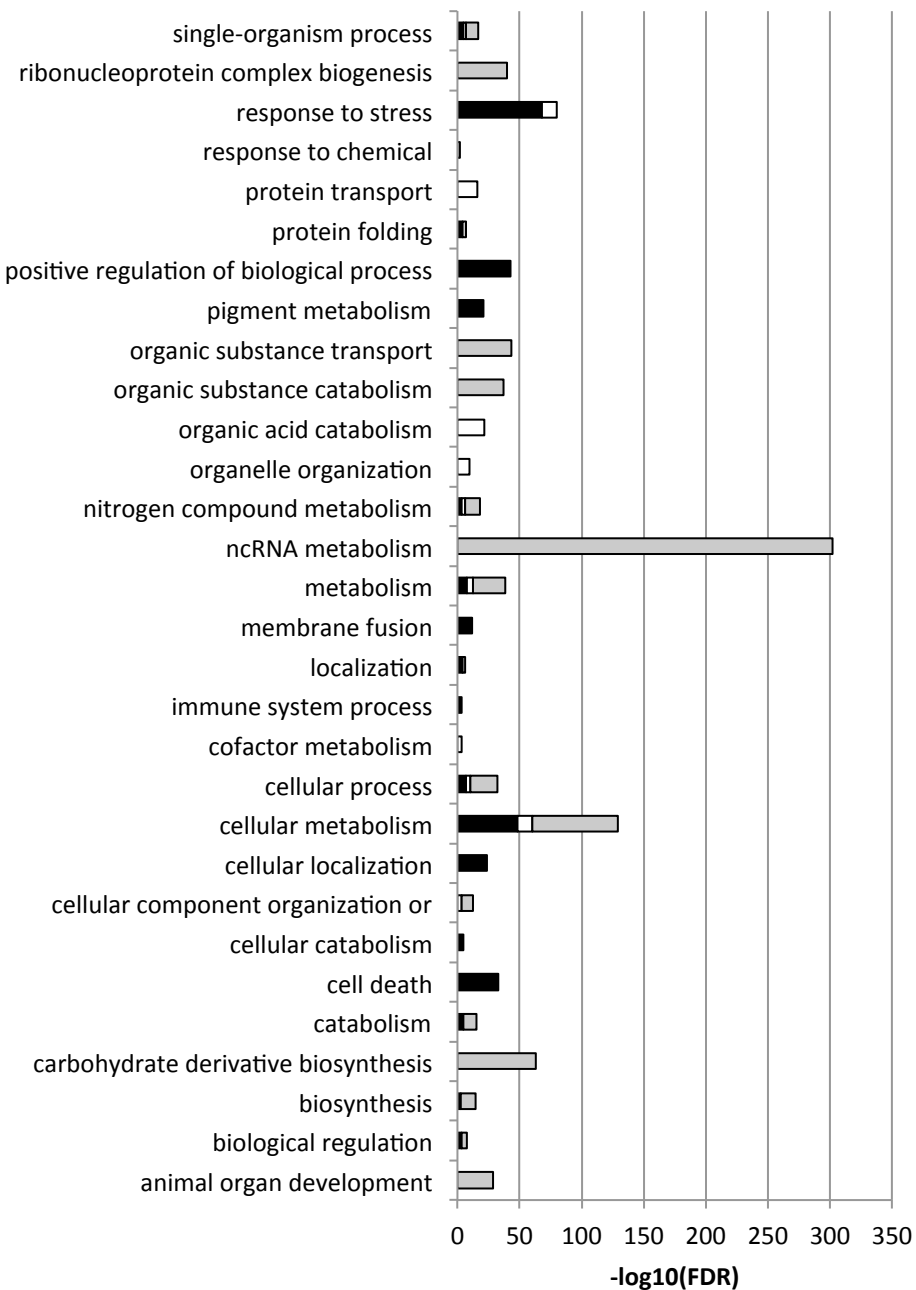

## Under-expressed genes

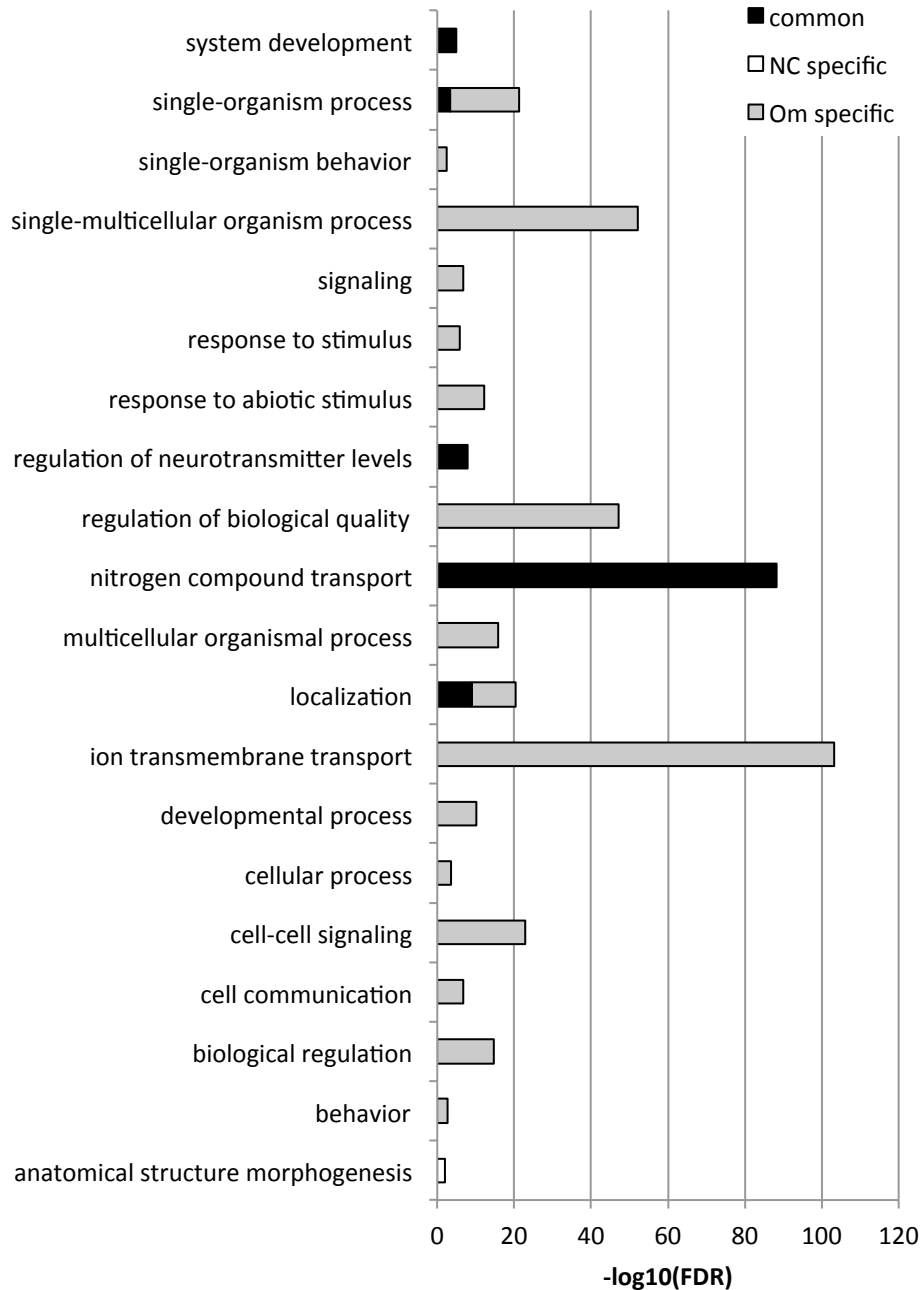

Source: https://www.biorxiv.org/content/10.1101/398602v1.full.pdf
