1 Gene expression plasticity and frontloading promote  
2 thermotolerance in *Pocillopora* corals

3  
4 Running title: *Pocillopora* holobiont response to heat stress  
5

6 Brener-Raffalli K.<sup>1</sup> (kelly.brener@univ-perp.fr), Vidal-Dupiol J.<sup>2</sup>  
7 (jeremie.vidal.dupiol@ifremer.fr), Adjeroud M.<sup>3</sup> (mehdi.adjeroud@ird.fr), Rey O.<sup>1</sup>  
8 (olivier.rey@univ-perp.fr), Romans P.<sup>4</sup> (pascal.romans@obs-banyuls.fr), Bonhomme F.<sup>5</sup>  
9 (francois.bonhomme@umontpellier.fr), Pratlong M.<sup>6,8</sup> (marine.pratlong@gmail.com),  
10 Haguenaer A.<sup>8</sup> (haguenaer.a@gmail.com), Pillot R.<sup>4</sup> (remi.pillot@obs-banyuls.fr),  
11 Feuillassier L.<sup>4</sup> (lionel.feuillassier@mnhn.fr), Claereboudt M.<sup>9</sup> (michelc@squ.edu.om),  
12 Magalon H.<sup>10</sup> (helene.magalon@univ-reunion.fr), Gélín P.<sup>10</sup>  
13 (pauline.gelin87@gmail.com), Pontarotti P.<sup>6,7</sup> (pierre.pontarotti@univ-amu.fr), Aurelle  
14 D.<sup>8,11</sup> (didier.aurelle@univ-amu.fr), Mitta G.<sup>1</sup> (mitta@univ-perp.fr) and Toulza E.<sup>1\*</sup>  
15 (eve.toulza@univ-perp.fr).

16  
17 1 IHPE, Univ. Montpellier, CNRS, Ifremer, Univ. Perpignan via Domitia, Perpignan France.

18 2 IHPE, Univ. Montpellier, CNRS, Ifremer, Univ. Perpignan via Domitia, Montpellier  
19 France.

20 3 Institut de Recherche pour le Développement, UMR 9220 ENTROPIE, Laboratoire  
21 d'Excellence "CORAIL", UPVD 52 Avenue Paul Alduy, 66860 Perpignan, France.

22 4 Sorbonne Universités, UPMC Univ Paris 06, UMS 2348, Centre de Ressources  
23 Biologiques Marines, Observatoire Océanologique, F-66650 Banyuls/Mer, France.

24 5 Université de Montpellier, Institut des Sciences de l'Évolution, CNRS UMR 5554 IRD-  
25 EPHE, Sète, France.

26 6 Aix Marseille Univ, IRD, APHM, Microbe, Evolution, PHYlogénie, Infection  
27 IHU Méditerranée Infection, Marseille France. Evolutionary Biology team.

28 7 CNRS

29 8 Aix-Marseille Université, Avignon Université, CNRS, IRD, IMBE, Marseille, France

30 9 Department of Marine Science and Fisheries, College of Agricultural and Marine  
31 Sciences, Sultan Qaboos University, Al-Khod, 123, Sultanate of Oman.

32 10 UMR 9220 ENTROPIE (Université de La Réunion, IRD, CNRS), Laboratoire  
33 d'excellence "CORAIL", Université de La Réunion, St Denis, La Réunion, France.

34 11 Aix-Marseille Université, Université de Toulon CNRS, IRD, MIO, Marseille, France

35

36 \* Corresponding author

## 37 ABSTRACT

38 Ecosystems worldwide are suffering from climate change. Coral reef ecosystems are  
39 globally threatened by increasing sea surface temperatures. However, gene expression  
40 plasticity provides the potential for organisms to respond rapidly and effectively to  
41 environmental changes, and would be favored in variable environments. In this study,  
42 we investigated the thermal stress response in *Pocillopora* coral colonies from two  
43 contrasting thermal regimes [more stable seawater temperatures in New Caledonia  
44 (South Pacific), more variable in Oman (Persian Gulf)] by exposing them to heat stress.  
45 We compared the physiological state, bacterial and Symbionaceae communities (using  
46 16S and ITS2 metabarcoding), and gene expression levels (using RNA-Seq) between  
47 control conditions and heat stress (the temperature just below the first signs of  
48 compromised health). Colonies from both thermal regimes remained apparently normal  
49 and presented open and colored polyps during heat stress, with no change in bacterial  
50 and Symbionaceae community composition. In contrast, they differed in their  
51 transcriptomic responses. The colonies from Oman displayed a more plastic  
52 transcriptome, but some genes had a higher basal expression level (frontloading)  
53 compared to the less thermotolerant colonies from New Caledonia. In terms of biological  
54 functions, we observed an increase in the expression of stress response genes (including  
55 induction of tumor necrosis factor receptors, heat shock proteins, and detoxification of  
56 reactive oxygen species), together with a decrease in the expression of genes involved in  
57 morpho-anatomical functions. Gene regulation (transcription factors, mobile elements)  
58 appeared to be overrepresented in the Oman colonies, indicating possible epigenetic  
59 regulation. These results show that transcriptomic plasticity and frontloading can be co-  
60 occurring processes in corals confronted to highly variable thermal regimes.

61 KEYWORDS: Gene expression plasticity, Frontloading, Coral holobiont, *Pocillopora*, Heat

62 stress.

63

## 64 INTRODUCTION

65 Earth is undergoing unprecedented global environmental changes with major effects on  
66 biodiversity (Barnosky *et al.* 2011). The ongoing erosion of the most vulnerable  
67 ecosystems due to current environmental degradation is particularly worrying and is  
68 only a premise to what scientists have called the sixth mass extinction (Barnosky *et al.*  
69 2011). In particular, climate change, ocean acidification and extreme climatic events  
70 have already resulted in the irreversible degradation of more than 20% of coral reefs  
71 worldwide (Bellwood *et al.* 2004; Hoegh-Guldberg *et al.* 2007). Scleractinian corals  
72 constitute the biological and physical framework for a large diversity of marine  
73 organisms [c.a. ~600 coral, ~2000 fish, and ~5000 mollusk species (Veron & Stafford-  
74 Smith 2000; Reaka-Kudla 2005)]. Hence, the extinction or even major decrease of corals  
75 would have dramatic repercussions on the overall associated communities (Hughes *et*  
76 *al.* 2017a). Natural variation in thermal tolerance exists among coral populations (Oliver  
77 & Palumbi 2010; Palumbi *et al.* 2014), especially along a latitudinal gradient (Polato *et al.*  
78 2010; Dixon *et al.* 2015), hence providing some hope for coral survival based on their  
79 capacity to cope with heat stress. More specifically, populations inhabiting in zones with  
80 more variable temperature regimes display better tolerance to heat stress. This pattern  
81 can be verified from local (Kenkel *et al.* 2013) to geographical scales (Hughes *et al.* 2003;  
82 Riegl *et al.* 2011; Coles & Riegl 2013).

83 Understanding the evolutionary processes underlying coral thermo-tolerance at the host  
84 level is crucial to better predict the fate of coral populations in response to climate  
85 change. In particular, it remains unclear whether thermo-tolerance is acquired via  
86 acclimation (i.e. intra-generational gene expression plasticity; (Barnosky *et al.* 2011;  
87 Kenkel & Matz 2016)) and/or through genetic adaptation (i.e. inter-generational

88 microevolution; (Barnosky *et al.* 2011; Dixon *et al.* 2015)). Under the former hypothesis  
89 one should expect that the present-day sensitive coral populations could potentially  
90 acquire tolerance to heat stress along with the ongoing climate change. According to the  
91 latter hypothesis, the persistence of initially thermo-sensitive coral populations would  
92 depend on the emergence of better adapted lineages through microevolution and/or on  
93 the genetic rescue via gene flow from populations already adapted to heat stress  
94 (Bellwood *et al.* 2004; Barnosky *et al.* 2011; Dixon *et al.* 2015). Actually, some studies  
95 strongly suggest that both processes (i.e. acclimation and adaptation) are likely to co-  
96 occur in wild coral populations (Hoegh-Guldberg *et al.* 2007; Reusch 2013; Palumbi *et al.*  
97 2014; Torda *et al.* 2017).

98 With the recent advances of high throughput molecular methods, it is now possible to  
99 discriminate both processes while providing a more precise account of the molecular  
100 mechanisms underlying coral response to heat stress. In particular, recent studies  
101 clearly demonstrated that coral responses to heat stress involve the fine-tuned  
102 regulation of expression levels of some genes/proteins involved in several molecular  
103 pathways such as metabolism, stress-response and apoptosis (Brown *et al.* 2002; Weis  
104 2008; Ainsworth *et al.* 2011; Bellantuono *et al.* 2012a; Barshis *et al.* 2013; Kenkel *et al.*  
105 2013; Palumbi *et al.* 2014). In this regard, two main molecular patterns having different  
106 temporalities have been put forward: (1) “transcriptional plasticity”, i.e. extensive  
107 changes in gene expression levels according to the occurring thermal condition and (2)  
108 “transcriptional frontloading”, i.e. the elevation of stress related genes baseline  
109 expression that preconditions organisms to subsequent (recurrent) stresses (Reaka-  
110 Kudla 2005; Mayfield *et al.* 2011; Barshis *et al.* 2013; Palumbi *et al.* 2014; Hughes *et al.*  
111 2017a). While such elevated constitutive gene expression levels could reflect local

112 adaptation (i.e. genetically fixed gene expression level; (Oliver & Palumbi 2010; Palumbi  
113 *et al.* 2014), it could also reflect an acclimation via epigenetic processes leading to  
114 constitutive gene expression (Torda *et al.* 2017). Epigenetic changes through  
115 environmental priming (i.e. translation of environmental cues) may be involved in  
116 adaptive evolution at such short timescales, eventually enabling transgenerational  
117 plasticity (Jablonka 2017).

118 Surprisingly, frontloading and gene expression plasticity were generally discussed as  
119 mutually exclusive patterns (Barshis *et al.* 2013; Dixon *et al.* 2015; Kenkel & Matz 2016)  
120 although these two molecular processes most likely co-occur during coral responses to  
121 heat stress. In particular, one might expect that the regulation strategy of genes  
122 (plasticity versus frontloading) will greatly depend on the molecular pathways in which  
123 they are involved and the energetic, physiological, and ultimately fitness cost associated  
124 with gene expression. So far, frontloading has been detected for stress response genes  
125 such as Heat Shock Proteins (HSPs), apoptosis and tumour suppression factors in  
126 resilient coral populations under experimentally simulated heat stress inducing  
127 bleaching in the common reef-building coral *Acropora hyacinthus* (Polato *et al.* 2010;  
128 Barshis *et al.* 2013; Dixon *et al.* 2015; Kenkel & Matz 2016) and for metabolic genes in  
129 populations pre-exposed to warm temperatures in response to long-term heat stress in  
130 *Porites astreoides* (Kenkel *et al.* 2013; Palumbi *et al.* 2014). Conversely, in the latter  
131 species, plasticity was observed in the expression of environmental stress response  
132 genes (Riegl *et al.* 2011; Kenkel & Matz 2016), hence challenging the patterns observed  
133 in *A. Hyacinthus* (Barshis *et al.* 2013; Coles & Riegl 2013). Although both strategies (i.e.  
134 constitutive frontloading *versus* expression plasticity) undoubtedly exist in wild coral  
135 populations, the pre-exposure conditions that foster their induction and their relative

136 effects on coral resistance to heat stress still remain unclear (but see (Hughes *et al.*  
137 2003; Kenkel & Matz 2016)).

138 Importantly, scleractinian corals are composed of several symbiotic organisms including  
139 the cnidarian host, the mutualist photosynthetic algae (formerly defined as belonging to  
140 the genus *Symbiodinium* but now considered as different genera within the family  
141 Symbionaceae (Lajeunesse *et al.* 2018)) and bacterial communities. All partners (bionts)  
142 involved in a stable symbiosis effectively form the entire organism, and constitute what  
143 is referred to the holobiont (Margulis & Fester 1991). A decade after this term was  
144 defined, its use has been particularly popularized in reference to corals (Rohwer *et al.*  
145 2002), and subsequent research has led to the hologenome theory of evolution  
146 (Rosenberg *et al.* 2007; Zilber-Rosenberg & Rosenberg 2008). In this context, the  
147 hologenome is defined as the sum of the genetic information of the host and its  
148 symbiotic microorganisms. Phenotypes are thus the product of the collective genomes of  
149 the holobiont partners in interaction with the environment, which constitute the unit of  
150 biological organization and thus the object of natural selection (Zilber-Rosenberg &  
151 Rosenberg 2008; Guerrero *et al.* 2013; McFall-Ngai *et al.* 2013; Bordenstein & Theis  
152 2015; Theis *et al.* 2016). Additionally to the cnidarian host response, the genotype -or  
153 association of genotypes- of the photosynthetic mutualist Symbionaceae symbionts  
154 plays a key role in the thermotolerance of the holobiont (Hume *et al.* 2013; Mayfield *et*  
155 *al.* 2014; Suggett *et al.* 2017). There is less certainty about the importance of the coral  
156 bacterial community in participating to the fitness of the holobiont, although accruing  
157 evidences strongly suggest their implication in coral response to environmental  
158 conditions (Li *et al.* 2014; Pantos *et al.* 2015; Hernandez-Agreda *et al.* 2016), and in the  
159 resistance to diseases (Sato *et al.* 2009; Cróquer *et al.* 2013; Meyer *et al.* 2016). Finally,

160 the role of the coral-associated microorganisms and their potential to modify holobiont  
161 adaptability remain so far overlooked (but see (Ziegler *et al.* 2017; Torda *et al.* 2017)).  
162 Hence, studying how corals respond to stress implies an integrative approach to analyze  
163 the response of each symbiotic protagonist.

164 With this aim, we investigated the molecular mechanisms underlying thermo-tolerance  
165 of coral holobionts. We analyzed the holobiont response to stress of two coral  
166 populations originating from environments with contrasting thermal regimes. We used  
167 scleractinian corals from the genus *Pocillopora* as model species because they have  
168 abroad spatial distribution throughout the Indo-Pacific (Veron & Stafford-Smith 2000).  
169 The genus *Pocillopora* is considered to be one of the most environmentally sensitive  
170 (van Woesik *et al.* 2011) but its widespread distribution clearly suggests potential for  
171 acclimation and/or adaptation which may be correlated to specific differences (i.e.  
172 different cryptic lineages may be adapted to different environmental conditions). In  
173 particular, we focused on *Pocillopora damicornis*-like colonies from two localities with  
174 contrasting thermal regimes: colonies from New Caledonia (NC) are exposed to  
175 temperate and stable temperatures over the year, while those from Oman are exposed  
176 to globally warmer and more seasonal fluctuating temperatures. As the *corallum*  
177 macromorphology is not a discriminant character in *Pocillopora* and as the taxonomic  
178 revision of this genus using molecular data reveals that some of the *Pocillopora* species  
179 (Schmidt-Roach *et al.* 2014; G elin *et al.* 2017b) are actually species complexes, we  
180 identified *a posteriori* the species of the sampled colonies (mitochondrial ORF  
181 sequencing and individual clustering) in order to interpret the results in a precise  
182 evolutionary context. To avoid biases inherent in transplantation-based field  
183 experiments resulting from environmental factors other than temperature, we



184 undertook our comparative study in a controlled environment in which we mimicked  
185 ecologically realistic heat stress to compare the responses of colonies from both  
186 localities. We combined a specific RNA-seq approach to study the cnidarian host  
187 response, and metabarcoding analyses using ITS-2 and 16S amplicon sequencing to  
188 study the dynamics of the associated algal (Symbionaceae) and bacterial community  
189 compositions, respectively. According to the literature we first expected to detect  
190 changes in both symbiotic algal and bacterial communities in corals from both localities  
191 when exposed to heat stress. Moreover, since variable environments are expected to  
192 promote the evolution of plasticity, we predicted that the cnidarian hosts from Oman  
193 will display more gene expression plasticity than those from New Caledonia. However,  
194 because frontloading was also found to be an alternative response to recurrent changing  
195 conditions, we might also expect some degrees of constitutive high levels of gene  
196 expression at least for some molecular pathways and more particularly in Oman corals.

## 197 MATERIAL AND METHODS

### 198 CORAL SAMPLING AND MAINTENANCE

199 *Pocillopora damicornis*-like colonies originating from environments characterized by  
200 contrasting thermal regimes were sampled during the warmer month in two different  
201 localities: (1) in Oman, Gulf of Oman, Northwestern Indian Ocean (Om; June 2014; local  
202 seawater temperature during sampling 30.8°C), where corals are exposed to a globally  
203 warmer and variable thermal environment, and (2) in New Caledonia, Southwestern  
204 Pacific Ocean (NC; November 2014; local seawater temperature during sampling  
205 27.1°C), where corals are subject to more mitigate and stable temperatures (see Table 1  
206 for the temperature regime of locality). From each location, we thus sampled colonies  
207 morphologically similar and occupying the same water depth niche. To account for

208 possible intra-population diversity, three colonies (>20 cm in diameter) were collected  
209 in each locality, and separated by at least 10 m to decrease the probability to collect  
210 members of the same genet, as some *Pocillopora* species are able to propagate by  
211 asexual reproduction (Adjeroud *et al.* 2013; Gélin *et al.* 2017a; 2018). Immediately  
212 following collection, a 1 cm branch tip of each colony was excised, rinsed three times in  
213 filtered seawater (0.22  $\mu\text{m}$ ), and placed in RNAlater solution (Sigma Aldrich) for the *in*  
214 *situ* microbiota analysis. The rest of the colony was fragmented into 20 branches each of  
215 10 cm length and physiologically stabilized in openwater system for one week before  
216 shipping (Al-Hail field station of the Sultan Qaboos University and the Public aquarium of  
217 Noumea for OM and NC localities respectively). For shipping, individual branches were  
218 placed in plastic bags containing oxygenated seawater (800mL seawater and 1600mL of  
219 medical oxygen), and transported by aircraft to the research aquarium of the Banyuls-  
220 sur-Mer oceanographic observatory (France). The coral branches were maintained in  
221 artificial seawater (Seachem Reef Salt) at 26°C, and supplied daily with *Artemia* nauplii  
222 to satisfy their heterotrophic demand. The conditions in the maintenance tank were  
223 controlled to mimic the natural physicochemical parameters of coral reefs (pH:8.2;  
224 salinity: 36; light intensity: 150 to 250  $\mu\text{mol}$  of photons/m<sup>2</sup>/s; photoperiod: 12h  
225 night/12h day; kH: 6–7.5 dkH; calcium concentration: 410–450 mg/L; inorganic  
226 phosphate concentration: < 0.1 mg/L; magnesium concentration: 1300–1400 mg/L;  
227 nitrate concentration: < 5 mg/L). After 3 and 7 months of acclimatization to the  
228 laboratory condition (marked by growth resumption) for Om and NC colonies,  
229 respectively, corals were fragmented to produce a total of ~15 to 20 clones (nubbins)  
230 from each colony (~3 cm). These were individually fixed to a support (here a p1000 tip)

231 using an epoxy adhesive. We waited for complete healing (evident as tissue extending to  
232 cover the epoxy adhesive) prior to run the experiment.

### 233 ECOLOGICALLY REALISTIC HEAT STRESS

234 The aim of this experiment was to compare the response to heat stress of colonies from  
235 two localities having the same physiological state, to investigate the patterns of  
236 expression of the molecular pathways involved during the stress exposure and the  
237 putative modifications of the coral microbiota.

238 The experimental design comprised eight tanks of 53 L per locality in which the  
239 seawater was continuously recycled. The water was sterilized using UV (rate 3200 L/h)  
240 and renewed twice per hour in each tank (recirculation rate: 100L/h in each tank). The  
241 eight tanks shared the same seawater but their temperature was monitored individually  
242 (HOBBY BiothermPro, model 10892; 500W Aqua Medic titanium heater; HOBO TidbiT  
243 v2 logger) (Supplementary Figure S1). For each locality, 5 to 8 nubbins per mother  
244 colonies were randomly placed in each tank (four tanks per locality) for two weeks at  
245 the control temperature and the following protocol was applied: three tanks were then  
246 subjected to a gradual temperature increase (stress treatment) while the fourth  
247 (control) was maintained at the control temperature to verify that the stress observed in  
248 the stressful treatment was not due to other potential confounding effects or water cues  
249 (Figure 1). Both the control and stress temperatures were specific for each sampling  
250 locality to mimic their respective natural environment. In particular, we set the control  
251 temperature as the mean water temperature for the three warmer months measured at  
252 the coral sampling site locality (Table 1): 31°C for the colonies from Om, and 27°C for  
253 the colonies from NC. The stress treatment was ecologically realistic, i.e. reflecting a  
254 naturally occurring warming anomaly, and consisted in increasing the temperature

255 gradually by 1°C (over 5 consecutive hours) each week until physiological collapse of the  
256 corals became evident (polyps closure, bleaching or necrosis), as described by (Vidal-  
257 Dupiol *et al.* 2009). Sampling was performed in the three sampling tanks just before the  
258 first temperature increase (control condition) as well as each week before the next  
259 temperature increase. The beginning of polyp closure was consistently observed for the  
260 different colonies of the same locality at the same temperature threshold. Samples for  
261 subsequent genetic and transcriptomic analyses were chosen *a posteriori*. They  
262 corresponded to those sampled in each tank just before the first increase of temperature  
263 (control samples), and just before the temperature that produced the first signs of  
264 physiological collapse and before bleaching (stress temperature samples). Thus, for each  
265 condition (control and stress) we obtained three biological replicates of each colony  
266 from the three different tanks (three colonies per locality) to reach a total of 36 samples  
267 (2 localities × 3 colonies × 2 experimental conditions × 3 replicates/tanks). The general  
268 health of the nubbins was assessed via daily photographic monitoring (at noon prior to  
269 feeding) throughout the period of the experiment.

#### 270 DNA EXTRACTION

271 DNA was extracted from each 36 samples as well as coral tips directly collected on the  
272 six colonies *in natura* for the *in situ* condition (three in Om, three in NC), using the  
273 DNeasy Blood and Tissue kit (Qiagen) following the manufacturer's instructions. DNA  
274 was quantified by spectrophotometry (NanoDrop).

#### 275 HOST SPECIES AND CLONEMATES IDENTIFICATION

276 As the *corallum* macromorphology is not a diagnostic criterion in *Pocillopora* genus, the  
277 host species was thus identified molecularly. Thus each colony was sequenced for the  
278 mitochondrial variable open reading frame (ORF) and was genotyped using 13 specific

279 microsatellites, as in G elin *et al.* (G elin *et al.* 2017b). Then each colony used in the  
280 experiment was assigned to Primary and Secondary Species Hypothesis (PSH and SSH;  
281 *sensu* Pante *et al.*) (Pante *et al.* 2015) following the nomenclature from G elin *et al.* (G elin  
282 *et al.* 2017b). Indeed, sampling *Pocillopora* colonies presenting various morphs from  
283 different locations from the Indo-Pacific, G elin *et al.* classified these colonies, without *a*  
284 *priori* based on *corallum* macromorphology ,into Species Hypotheses (*sensu* Pante *et al.*,  
285 i.e. the species are hypotheses that can be confirmed or refuted while new data are  
286 added) (Pante *et al.* 2015) using sequence-based species delimitation methods, a first  
287 sorting allowed to define Primary Species Hypotheses (PSH) and then individual  
288 clustering based on microsatellite multilocus genotypes allowed a second sorting  
289 delimiting Secondary Species Hypotheses (SSH). Thus comparing the ORF sequences  
290 obtained in this study to those from (G elin *et al.* 2017b), the sampled colonies were  
291 assigned to a PSH. Then, if relevant, the colonies were assigned to SSH performing  
292 clustering analysis using Structure 2.3.4 (Pritchard *et al.* 2000), as in (G elin *et al.* 2017b).  
293 Meanwhile, the identical multi-locus genotypes (i.e. clonemates if any) were identified  
294 by microsatellite analysis using GenClone (Arnaud-Haond & Belkhir 2006) as in G elin *et*  
295 *al.* 2017a).

## 296 MICROBIAL COMMUNITY ANALYSIS USING MISEQ 16S AND 297 ITS2 METABARCODING

298 The aim of this analysis was to investigate the composition and the dynamics of the two  
299 principal symbiotic coral communities (i.e. bacterial and algal) *in situ* and during heat  
300 stress.

301

302

303 AMPLICON SEQUENCING

304 A bacterial 16S rDNA amplicon library was generated for each of the 42 samples (one *in*  
305 *situ* condition, three control conditions and three stress conditions per colony, three  
306 colonies per locality, two localities), using the 341F (CCTACGGGNGGCWGCAG) and 805R  
307 (GACTACHVGGGTATCTAATCC) primers, which target the variable V3/V4 loops  
308 (Klindworth *et al.* 2012). The Symbiodiniaceae assemblages were analyzed using ITS2  
309 (internal transcribed spacer of the ribosomal RNA gene) amplicon libraries and specific  
310 primers targeting a sequence of approximately 350 bp (ITS2-F  
311 GTGAATTGCAGAACTCCGTG; ITS2-R CCTCCGCTTACTTATATGCTT) (Lajeunesse &  
312 Trench 2000; Quigley *et al.* 2014). For both markers, paired-end sequencing using a  
313 250 bp read length was performed on the MiSeq system (Illumina) using the v2  
314 chemistry, according to the manufacturer's protocol at the Centre d'Innovation Génome  
315 Québec and McGill University, Montreal, Canada.

316 BIOINFORMATIC ANALYSIS:

317 The FROGS pipeline (Find Rapidly OTU with Galaxy Solution) implemented on a Galaxy  
318 platform (<http://sigenae-workbench.toulouse.inra.fr/galaxy/>) was used for data  
319 processing (Escudié *et al.* 2017). In brief, paired reads were merged using FLASH  
320 (Magoč & Salzberg 2011). After cleaning and removal of primer/adapters using cutadapt  
321 (Martin 2011), *de novo* clustering was performed using SWARM (Mahé *et al.* 2014). This  
322 uses a local clustering threshold with an aggregation distance (d) of 3. Chimeras were  
323 removed using VSEARCH (Rognes *et al.* 2016). We filtered the dataset for singletons and  
324 performed affiliation using Blast+ against the Silva database (release 128, September  
325 2016) for 16S amplicons (Altschul *et al.* 1990). For ITS2 metabarcoding, the  
326 Symbiodiniaceae type was assessed using Blast+ against an in-house database of

327 Symbiodiniaceae reference sequences built from sequences publicly available. An OTU  
328 table in standard BIOM format with taxonomic affiliation was produced for subsequent  
329 analyses.

330 For community composition analysis we used the *phyloseq* R package (McMurdie &  
331 Holmes 2013) to infer alpha diversity metrics at the OTU level, and beta diversity  
332 (between sample similarity) from the OTU table. Community similarity was assessed by  
333 Principal Coordinate Analysis (PCoA) using the Bray-Curtis distance matrices.

334 We performed one-way ANOVAs to compare alpha and beta diversity metrics among the  
335 groups of samples by sampling locality or by treatment. Corrections based on multiple  
336 testing were performed using FDR (Benjamini & Hochberg 1995). For all analyses, the  
337 threshold significance level was set at 0.05.

#### 338 TRANSCRIPTOME ANALYSIS

339 The aim of this analysis was to study the transcriptomes of the sampled colonies in  
340 response to heat stress compared with controlled conditions.

#### 341 RNA EXTRACTION

342 Total RNA was extracted from each coral sample using TRIzol reagent (Invitrogen),  
343 according to the manufacturer's protocol. The quantity and integrity of the total RNA  
344 extracted was checked using an Agilent 2100 Bioanalyzer (Agilent Technologies)(mean  
345 RIN =7.5). Paired-end fragment libraries (2 × 100 bp) were constructed and sequenced  
346 on an Illumina HiSeq 2000 platform at the Centre d'Innovation Génome Québec at McGill  
347 University, Montreal, Canada.

#### 348 BIOINFORMATIC ANALYSES

349 Fastq read files were processed on the Galaxy instance of the IHPE ([http://bioinfo.univ-](http://bioinfo.univ-perp.fr)  
350 [perp.fr](http://bioinfo.univ-perp.fr)) (Giardine *et al.* 2005). Quality control and initial cleaning of the reads were

351 performed using the filter by quality program (version 1.0.0) based on the FASTX-toolkit  
352 (Blankenberg *et al.* 2010). Reads having fewer than 90% of bases having a Phred quality  
353 score  $\leq 26$  were discarded (probability of 2.5 incorrect base call out of 1000, and a base  
354 call accuracy of 99.75%). Adaptors used for sequencing were removed using the  
355 cutadapt program version 1.6 (Martin 2011). All paired-end reads were aligned using  
356 RNAsStar software under default parameters, with at least 66% of the bases being  
357 required to align to the reference, and a maximum of ten mismatches per read (Dobin *et*  
358 *al.* 2013). The *Pocillopora damicornis sensu lato* reference genome used in this study  
359 (manuscript in preparation) consisted of a draft assembly of 25,553 contigs (352 Mb  
360 total) and N50 = 171,375 bp. The resulting transcriptome served as the reference for  
361 reads mapping, and a GTF annotation file was constructed using cufflink/cuffmerge  
362 (Trapnell *et al.* 2010). HTseq was used to produce count files for genes (Anders *et al.*  
363 2015). The DESeq2 package was used to estimate the normalized abundances of the  
364 transcripts, and to calculate differential gene expression for samples between the  
365 control temperature and the stress temperature for each locality (Love *et al.* 2014),  
366 considering the different genotypes (three biological replicates for each genotype) and  
367 using default parameters. We next analyzed genes according to their expression  
368 patterns among the different colonies and temperature treatments. Genes were  
369 clustered manually into six groups according to their differential expression levels:  
370 common over-expressed genes, NC-specific over-expressed genes, Om-specific over-  
371 expressed genes, common under-expressed genes, NC-specific under-expressed genes,  
372 and Om-specific under-expressed genes. Cluster 3.0 (de Hoon *et al.* 2004) and Treeview  
373 (Saldanha 2004) were used to build the heatmap.

374



375 DISCRIMINANT ANALYSIS OF PRINCIPAL COMPONENTS (DAPC):

376 Our aim was to quantify and compare the level of genome-wide transcriptome plasticity  
377 between colonies from Om and NC in response to heat stress. To achieve this we  
378 performed a discriminant analysis of principal components (DAPC) based on a log-  
379 transformed transcript abundance matrix (containing 26,600 genes) obtained from the  
380 36 samples (*i.e.* 9 control and 9 stressed replicates per locality), as described previously  
381 (Kenkel & Matz 2016). Specifically, we ran a DAPC analysis using the resulting log2  
382 transformed dataset for the colonies from NC and Om reared in controlled conditions as  
383 predefined groups in the *adeget* package implemented in R (Jombart *et al.* 2010). Two  
384 principal components and a single discriminant function were retained. We then  
385 predicted the position of stressed colonies from both localities (Om and NC) onto the  
386 unique discriminant function of the DAPC.

387 We next ran a general linear model (GLM) using the DAPC scores as dependent variable,  
388 and accounted for the locality of origin (NC and Om), the conditions (control and heat  
389 stress), and their interaction as explanatory variables. We also considered the effect of  
390 individual colonies nested within localities as random effects in the model. Our final  
391 objective was to test for a potential significant effect of the interaction between the  
392 locality and the condition effects, as a proxy of significant differences in the genome-  
393 wide gene expression reaction norms (*i.e.* differences in DAPC scores between the  
394 control and the heat stress treatments) between Om and NC colonies..

395 GO ENRICHMENT OF DIFFERENTIALLY EXPRESSED GENES

396 The transcriptome was annotated *de novo* using a translated nucleotide query (blastx  
397 (Altschul *et al.* 1990)) against the non-redundant protein sequence database (nr). The  
398 25 best hits were then used to search for gene ontology terms using the Blast2Go

399 program (Conesa *et al.* 2016). To identify the biological functions significantly enriched  
400 within up or down-regulated genes, a Gene Ontology (GO) term enrichment analysis was  
401 performed. Lists of GO terms belonging to significantly up-regulated and down-  
402 regulated genes were compared to the GO terms of the whole expressed gene set using a  
403 Fischer exact test and a FDR value of 0.05. We used REVIGO to visualize the enriched  
404 biological processes (Supek *et al.* 2011).

## 405 RESULTS

### 406 HOST IDENTIFICATION

407 Among the three colonies from New Caledonia, colonies NC2 and NC3 presented  
408 haplotype ORF18 and were assigned to Primary Species Hypothesis PSH05 and more  
409 precisely to Secondary Species Hypothesis SSH05a (Gélin *et al.* 2017b), corresponding to  
410 *P. damicornis* type  $\beta$  (Schmidt-Roach *et al.* 2014) or type 5a (Pinzón *et al.* 2013), while  
411 colony NC1 presented ORF09 and was assigned to PSH04, *P. damicornis* type  $\alpha$ ,  
412 *P. damicornis* or type 4a, respectively. As for colonies from Oman, they all presented  
413 ORF34 and were assigned to PSH12 (Gélin *et al.* 2017a) or type 7a (Pinzón *et al.* 2013)  
414 (Supplementary Table S2), that is not part of the *P. damicornis sensu lato* species  
415 complex. Thus NC colonies are phylogenetically closer from each other than from  
416 colonies from Oman. These three PSHs represent three different species.

417 Furthermore, NC2 and NC3 multi-locus genotypes (MLGs) differed only from one allele  
418 over 26 gene copies, and were thus part of the same clonal lineage (genet), i.e. the entity  
419 that groups together colonies whose multi-locus genotypes slightly differ due to somatic  
420 mutations or scoring errors. All the other colonies presented MLG that differed enough  
421 not to be considered as clonemates or members of the same clonal lineage (genet).

422 ECOLOGICALLY REALISTIC HEAT STRESS

423 Our goal was to ensure that our experimental heat stress faithfully reflects a realistic  
424 heat stress *in natura*. Following collection from the field, the corals from the different  
425 localities were first maintained in the same controlled conditions at 26°C prior to the  
426 experiment. During this period no mortality or signs of degradation/stress were  
427 observed for any of the coral colonies. Two weeks before the experiment, a first  
428 acclimatization to the control temperatures (27°C or 31°C for NC and Om respectively)  
429 was performed. During the experimental heat stress (i.e. gradual temperature increase),  
430 visual and photographic monitoring clearly indicated that the first sign of coral stress  
431 (i.e. the closure of polyps) occurred at day 30 for both sampling localities, corresponding  
432 to 30°C and 34°C for the NC and Om colonies, respectively. These temperatures perfectly  
433 match the warmest temperature experienced by these colonies in the field (Table 1). No  
434 signs of physiological collapse were observed in control corals throughout the  
435 experiment indicating that all the other parameters were maintained optimal for coral  
436 colonies.

437 BACTERIAL COMMUNITIES

438 Among the overall 42 samples analyzed, a total of 5,308,761 16S rDNA amplicon  
439 sequences were obtained after cleaning and singleton filtering corresponding to 15,211  
440 OTUs. In all samples the class Gammaproteobacteria was dominant (77.7%), particularly  
441 the genus *Endozoicomonas* (44.7% of the sequences); this genus is known to be an  
442 endosymbiont of numerous scleractinians (Neave *et al.* 2016b) (See Supplementary  
443 Figure S3 for complete bacterial composition in each colony and replicate). The PCoA of  
444 Bray-Curtis distances for all colonies showed no evident clusters based on the  
445 experimental treatments (Figure 2). We observed a loose grouping based on localities

446 and colonies, except for colony NC1, which appeared to have a more specific microbiota  
447 composition, as it had a different grouping associated with the first axis, which  
448 explained 22.3% of the variance. This could be correlated with the different species  
449 hypotheses for NC1 compared to NC2 and NC3 (see above). The one-way ANOVA for  
450 alpha diversity (Shannon index) revealed significant differences in the microbiota  
451 diversity between localities ( $P < 0.05$ ) and colonies ( $P < 0.05$ ), but no differences among  
452 the *in situ*, control and stress conditions ( $P = 0.885$ ). Similar results were obtained for the  
453 beta-diversity (Bray-Curtis distance) (ANOVA between localities:  $P < 0.05$ ; between  
454 colonies:  $P < 0.05$ ; between conditions:  $P = 0.554$ ; the ANOVA results are provided in  
455 Supplementary Table S4). Thus, the bacterial composition appeared to be relatively  
456 specific to each colony within each locality, but no major shift was observed during the  
457 transition from the natural environment to artificial seawater, nor during heat stress  
458 exposure.

#### 459 SYMBIODINIACEAE ASSEMBLAGES

460 Analysis of the Symbiodiniaceae composition was performed based on an ITS2  
461 metabarcoding, which allowed intra-clade resolution.

462 Removal of OTUs having an abundance of  $< 1\%$  left only 4 OTUs among all samples. Two  
463 of these corresponded to type C1, while the other two corresponded to type D1a  
464 according to (Baker 2003). Type D1a was highly dominant in the colonies originating  
465 from Oman, whereas type C1 was almost exclusive to the corals from New Caledonia  
466 (Figure 3). The Symbiodiniaceae community composition was very specific to each  
467 locality, but remained stable during the transition from the natural environment to  
468 artificial seawater, and during heat stress exposure.

469 HOST TRANSCRIPTOME ANALYSIS

470 We generated 36 transcriptomes corresponding to triplicate samples for three colonies  
471 of each locality exposed to the control (C) and stress (S) temperatures.

472 Overall, the transcriptome sequencing of these 36 samples yielded 1,970,889,548 high  
473 quality Illumina paired reads of 100 bp. Globally, 40–64% of reads obtained for the Om  
474 colonies, and 59–70% of reads obtained for NC colonies successfully mapped to the  
475 *Pocillopora damicornis* (type  $\beta$ ) reference genome. The apparently better alignment of  
476 samples from New Caledonia most likely relies on the fact that the New Caledonia  
477 colonies used in this study belong to *P. damicornis* types  $\alpha$  or 4a (PSH04) and  $\beta$  or 5a  
478 (PSH05), which are phylogenetically close to each other and closer from the reference  
479 genome, than the Om colonies from type 7a (PSH12) that is phylogenetically more  
480 distant from the reference genome. The aligned reads were assembled in 99,571 unique  
481 transcripts (TCONS), representing putative splicing variants of 26,600 genes identified  
482 as “XLOC” in the genome (FASTA sequences available in Supplementary File S5).

483 The hierarchical clustering analyses clearly grouped together samples belonging to the  
484 same locality and species hypothesis according to their genome-wide gene expression  
485 patterns, in link with the phylogenetic differences between the NC and Om haplotypes  
486 (Figure 4). Within locality and species hypothesis, the transcriptomes also grouped by  
487 colony, indicating that the transcriptomes were genotype-specific. For each colony, the  
488 transcriptomes then grouped by condition (control or heat stress), except for New  
489 Caledonia colonies NC2 and NC3 (corresponding to the same clonal lineage) that  
490 clustered together when exposed to control and heat stress conditions.

491 Despite clustering of the transcriptomes by locality, as the sampling of *Pocillopora*  
492 *damicornis*-like colonies actually corresponded to different species we performed  
493 differential gene expression analysis for each colony independently (comparing the  
494 biological triplicates for the control condition vs. triplicates for the heat stress  
495 conditions). For each locality, the different colonies displayed similar patterns of  
496 differential gene expression with in any case a higher number of differentially expressed  
497 genes and higher fold-changes between control and heat stress condition in Om  
498 compared to NC (Supplementary Figure S6). We detected 673, 479 and 265  
499 differentially expressed genes for NC1, NC2 and NC3 respectively, vs. 2870, 2216 and  
500 959 for Om1, Om2 and Om3. Samples were thus grouped for each locality (nine control  
501 nubbins + nine heat stress nubbins) for subsequent analyses (full results of the  
502 comparisons between stressed and controls (log<sub>2</sub>-foldchange and adjusted *p*-values) for  
503 each colony or between the two localities are provided in Supplementary File S7). For  
504 Om colonies, a total of 5,287 genes were differentially expressed between control and  
505 stress conditions. This number was much lower for NC colonies with 1,460 differentially  
506 expressed genes (adjusted *P* < 0.05).

507 Among differentially expressed genes genes, 848 were differentially expressed in the  
508 same direction in both localities (498 over-expressed and 350 under-expressed).  
509 Nevertheless, the differential expression level was significantly higher for the Om corals  
510 with a mean log<sub>2</sub>-fold change of 0.9 for shared over-expressed genes in Om vs. 0.6 in NC,  
511 and -1.2 for the shared under-expressed genes in Om vs. -0.8 in NC (Wilcoxon test; *P* <  
512 0.0001) (Figure 6 and Supplementary Table S8).

513 Additionally, colonies from the two localities also responded specifically to heat stress.  
514 In particular, 272 genes were over-expressed and 294 were under-expressed only in the  
515 NC corals, whereas 2,082 were over-expressed and 2,311 were under-expressed only in  
516 the Om ones when exposed to heat stress. Finally, the colonies from both localities  
517 displayed antagonistic transcriptomic responses to heat stress for a small subset of  
518 genes (24 over-expressed in NC but under-expressed in Om, and 22 under-expressed in  
519 NC but over-expressed in Om).

520 Altogether these results revealed a greater transcriptomic response to heat stress in  
521 colonies originating from Oman compared to those from New Caledonia (4,393  
522 differentially expressed genes for the Om corals vs. 566 genes for the NC ones).

#### 523 DISCRIMINANT ANALYSIS OF PRINCIPAL COMPONENTS (DAPC):

524 At the overall gene expression level, our DAPC analysis clearly discriminated the  
525 colonies from both localities (Figure 7). More interestingly, the GLM revealed a  
526 significant interaction term between the locality and condition (control or heat stress)  
527 effects ( $P = 0.04$ ), hence indicating that the slope of the reaction norm was different  
528 between localities. More particularly, the Om colonies responded to a greater extent  
529 than the NC ones, and thus showed significantly higher gene expression plasticity in  
530 response to heat stress.

531 It is worth stressing that colonies having experienced the heat stress displayed more  
532 similar genome-wide expression profiles than controlled colonies (Fig. 7). Such pattern  
533 was also observed in colonies of mustard hill coral *P. astreoides* experiencing a heat  
534 stress compared to controls (Kenkel & Matz 2016). This apparent convergence in the  
535 functional response of colonies from different habitats to heat stress might be at least

536 partly explain by the fact some common molecular pathways are turned-on when  
537 colonies are facing stressful conditions although the magnitude of such responses is  
538 different.

539

#### 540 ANALYSIS OF GENE FUNCTION:

541 To investigate the functions associated with the differentially expressed genes we  
542 performed a blastx annotation of transcripts followed by a Gene Ontology (GO) term  
543 (biological process, molecular function, and cell compartment) (Supplementary FileS9).

544 For the 498 common over-expressed genes, 139 biological processes were enriched  
545 compared to the entire set of annotated genes. The most significant biological process  
546 identified in the REVIGO analysis (i.e. with lowest FDR=  $2.1 \times 10^{-68}$ ) was response to  
547 stress (Figure 8). Following this sequentially, were cellular metabolism (FDR= $3.7 \times 10^{-49}$ ),  
548 positive regulation of biological processes (FDR =  $2.4 \times 10^{-43}$ ), cell death (FDR =  $2.5 \times 10^{-33}$ ),  
549 cellular localization (FDR =  $8.4 \times 10^{-25}$ ), and pigment metabolism (FDR =  $2.1 \times 10^{-21}$ ).

550 Among the 272 genes over-expressed in the NC but not in the Om colonies in response to  
551 heat stress, 38 biological processes were enriched: organic acid catabolism (FDR =  
552  $1.6 \times 10^{-22}$ ), protein transport (FDR =  $1.8 \times 10^{-16}$ ), stress response (FDR =  $4.8 \times 10^{-13}$ ), and  
553 cellular metabolism (FDR =  $3 \times 10^{-12}$ ) were the four most significantly enriched biological  
554 processes (Figure 8). Among the 2,082 genes over-expressed in the Om but not in the NC  
555 colonies in response to heat stress, 160 biological processes were enriched, the most  
556 significant being ncRNA metabolism (FDR =  $8.9 \times 10^{-303}$ ), cellular metabolism (FDR =  
557  $4.4 \times 10^{-70}$ ), carbohydrate derivative biosynthesis (FDR =  $5.9 \times 10^{-64}$ ), and organic  
558 substance transport (FDR =  $2 \times 10^{-44}$ ).



559 For the 350 genes that were under-expressed following heat stress irrespective to the  
560 locality of origin (Om or NC), 48 biological processes were enriched and grouped into  
561 five biological processes: nitrogen compound transport (FDR =  $5.4 \times 10^{-89}$ ), localization  
562 (FDR =  $8.1 \times 10^{-10}$ ), regulation of neurotransmitter levels (FDR =  $1.2 \times 10^{-8}$ ), system  
563 development (FDR =  $8.8 \times 10^{-6}$ ), and single organism process (FDR =  $4 \times 10^{-4}$ ). Among the  
564 under-expressed genes in the NC colonies only, a single biological process (anatomical  
565 structure/morphogenesis) was found to be enriched (FDR =  $9 \times 10^{-3}$ ). Among the under-  
566 expressed genes in the Om colonies, 139 biological processes were enriched, with the  
567 most significant being ion transmembrane transport (FDR =  $7.6 \times 10^{-104}$ ), single  
568 multicellular organism process (FDR =  $7.5 \times 10^{-53}$ ), regulation of biological quality (FDR =  
569  $6 \times 10^{-48}$ ), cell-cell signaling (FDR =  $1.5 \times 10^{-23}$ ), single organism process (FDR =  $1.1 \times 10^{-$   
570  $18$ ), multicellular organism process (FDR =  $1.5 \times 10^{-16}$ ), biological regulation (FDR =  
571  $2.3 \times 10^{-15}$ ), response to abiotic stimulus (FDR =  $6.2 \times 10^{-13}$ ), and localization (FDR =  
572  $4.6 \times 10^{-12}$ ).

573 The complete results for all GO term categories including molecular function are  
574 available in Supplementary File S9.

575 Regarding cellular compartments, the mitochondria was the most significantly enriched  
576 in the common over-expressed genes (FDR =  $1.5 \times 10^{-180}$ ), as well as among genes over-  
577 expressed in NC (FDR =  $2.5 \times 10^{-82}$ ) while in genes over-expressed in Om corals the  
578 intracellular organelle lumen was the most significantly enriched (FDR =  $1 \times 10^{-560}$ ).

579 To investigate whether the presumably more thermotolerant colonies from Oman  
580 displayed a frontloading strategy (i.e. a higher expression for some genes compared to

581 the colonies from NC) as previously described in scleractinian corals (Barshis *et al.*  
582 2013), we compared the gene expression levels in control conditions between Om and  
583 NC colonies for those genes that were over-expressed in NC colonies (Supplementary  
584 File S10). This comparison revealed that the constitutive expression level was often  
585 greater in the Om colonies. Among the 770 genes that were over-expressed in NC  
586 colonies in response to thermal stress (272 specifically and 498 in common with Om),  
587 484 were constitutively (i.e. in the control condition) more expressed in Om. Among  
588 these genes, 163 were not differentially expressed between the control and stress  
589 temperatures reflecting true frontloading based on the definition of Barshis *et al.*  
590 (2013), while 301 were over-expressed and only 20 were under-expressed during heat  
591 stress. These 484 genes with higher constitutive expression in Om were submitted to GO  
592 term enrichment analysis. No significant results were found for the under-expressed  
593 genes. The frontloaded genes were enriched in the biological processes cellular  
594 respiration (FDR =  $4.4 \times 10^{-23}$ ), cellular component organization (FDR = 0.002),  
595 homeostatic process (FDR = 0.005), cellular component organization or biogenesis (FDR  
596 = 0.007), cofactor metabolism (FDR = 0.009), and stress response (FDR = 0.009), and in  
597 the mitochondrion for the most significant cellular compartment (FDR =  $1.6 \times 10^{-66}$ ).  
598 Most interestingly, for genes associated with a higher basal expression level together  
599 with over-expression in the Om colonies, the most enriched biological processes were  
600 stress response (FDR =  $1.2 \times 10^{-26}$ ), pigment metabolism (FDR =  $5.1 \times 10^{-24}$ ), regulation of  
601 phosphate metabolism (FDR =  $3.2 \times 10^{-15}$ ), cellular metabolism (FDR =  $2.7 \times 10^{-11}$ ), and  
602 protein folding (FDR =  $7.3 \times 10^{-6}$ ).

603

## 604 DISCUSSION

### 605 SPECIFIC CONTEXT OF ADAPTATION

606 Our aim was to compare the phenotypic plasticity in terms of transcriptomic response to  
607 heat stress of coral colonies originating from different localities displaying contrasted  
608 thermal regimes. As morphology can be misleading for species identification in  
609 scleractinians, notably in *Pocillopora* genus (Gélin et al., 2017a), we used a molecular  
610 approach to test the species relationships of our samples. The analysis of mitochondrial  
611 sequences and clustering analyses indicated that, despite similar morphologies, our  
612 samples corresponded to different species. This agrees well with previous works  
613 showing the importance of cryptic lineages and morphological plasticity in the  
614 *Pocillopora* genus (Gélin et al. 2017a and references herein). Oman colonies  
615 corresponded to species hypothesis PSH12 of (Gélin et al. 2017b), which is restricted to  
616 the Northwestern Indian Ocean. Regarding the two species hypotheses from NC, SSH05a  
617 (*P. damicornis* type  $\beta$  SSH05a or *P. acuta*) is found in the Pacific Ocean and PSH04  
618 (*P. damicornis* type  $\alpha$  or *P. damicornis sensu stricto*) is nearly exclusively found in the  
619 Pacific Ocean (very rare in the Indian Ocean, and not found yet in Red Sea) (Gélin et al.  
620 2017b). It would be interesting to study whether inside each species hypothesis,  
621 different thermotolerance phenotypes are present. Conversely, the observation of a  
622 similar response to thermal stress in two different species in NC, as revealed by  
623 differential gene expression as well as DAPC analyses, could indicate either a conserved  
624 strategy or a convergence under the same ecological conditions.

### 625 AN ECOLOGICALLY REALISTIC HEAT STRESS

626 The heat stress applied in this study was ecologically realistic, since the first visual  
627 response (i.e. polyp closure) was observed for all colonies when the gradually increasing

628 experimental temperature reached the upper temperature they are subjected to *in*  
629 *natura* (30°C and 34°C for NC and Om corals, respectively). From a biological point of  
630 view this first result hence clearly supports that these colonies from two localities that  
631 are experiencing two different thermal regimes *in natura* display differential ability to  
632 deal with heat stress. Moreover, the accurate control of all other seawater parameters  
633 allows us to consider that the holobiont response to the thermal treatment is specific to  
634 heat stress and not to other possible confounding effects. Last, as we analyzed the  
635 samples before the first visible signs of stress (polyp closure), any change in the  
636 holobiont would therefore reflect the response to the heat stress and not homeostasis  
637 breakdown after disruption of the coral integrity.

638 **SYMBIOTIC COMMUNITY: BACTERIAL AND SYMBIONACEAE COMPOSITION**  
639 For the bacterial community, we identified significant differences between localities and  
640 colonies. The microbiota composition of all samples was consistent with previous  
641 studies, showing a high proportion of Gammaproteobacteria and dominance of the  
642 symbiotic *Endozoicomonas* genus (Bourne & Munn 2005; Neave *et al.* 2016a; Peixoto *et*  
643 *al.* 2017). However, our results clearly demonstrate that neither maintenance in the  
644 experimental structure nor experimental heat stress induced major bacterial community  
645 changes in coral colonies irrespective to their locality of origin. For the Symbionaceae  
646 community, the ITS2 metabarcoding analysis enabled inter-clade resolution (Quigley *et*  
647 *al.* 2014). Two distinct types of D1a and C1 clades dominated, representing most of the  
648 sequences in the Om and NC corals, respectively. Nine ITS types (A to I) have been  
649 identified in the former genus *Symbiodinium* (Baker 2003). Some Symbiodiniaceae  
650 strains strongly participate to the overall holobiont fitness, with type D providing  
651 tolerance to higher temperatures (Berkelmans & van Oppen 2006) and C1 enhancing

652 coral growth rates (Little *et al.* 2004). Interestingly, we found that the type D1a is  
653 dominant in the more thermotolerant Om corals, which is consistent with the results of  
654 previous works (Berkelmans & van Oppen 2006), however recent results shows that  
655 such an association is rather linked with minimal temperatures than annual amplitude  
656 of temperature changes (Brener-Raffalli *et al.* 2018).

657 Although the microbial community (both bacterial and Symbiodiniaceae) differed  
658 between the NC and Om corals, the composition did not change during transition from  
659 the field to the artificial seawater conditions, and remained similar during the  
660 experimental temperature increase. Thus, the coral holobiont assemblage remained  
661 stable over the course of the experiment. Such stability of the microbial community  
662 during experimental heat stress was previously observed in the scleractinian *Acropora*  
663 *millepora* (Bellantuono *et al.* 2012b) and *A. tenuis* (Littman *et al.* 2010). Thus, our study  
664 conforms to the idea that microbial communities associated with scleractinian corals  
665 remain unchanged when the holobionts are exposed to stressful temperatures (but see  
666 (Ziegler *et al.* 2017)) but further analyses of gene expression level would be needed to  
667 assess their functional responses. RNA-sequencing of eukaryotic poly-adenylated mRNA  
668 would allow in principle dual analysis of Symbiodiniaceae and coral host transcripts  
669 {Mayfield:2014et}, but since our RNA extraction method resulted in very few algal  
670 transcripts, we only focused on the host transcriptomic response.

671 Based on these results, we investigated changes in host gene expression as the main  
672 mechanism of response to heat stress in our experimental design.

673 HOST TRANSCRIPTOMIC RESPONSE

674 Given the observed stability of the microbial symbiotic community during heat stress,  
675 we focused more specifically on the responses attributable to the coral host. We thus  
676 compared gene expression patterns at the qualitative and quantitative levels in Om and  
677 NC colonies in response to heat stress compared to the control condition. Altogether, our  
678 results clearly highlight that the Oman colonies exposed to more variable thermal  
679 conditions *in natura* also display, in response to heat stress, a greater plasticity in gene  
680 expression levels than the NC colonies. In particular, the transcriptomic response of the  
681 Oman colonies involved a larger number of genes with 73% of commonly differentially  
682 expressed genes having higher fold changes compared to the NC colonies. These findings  
683 are consistent with the theoretical expectations that amore variable environment  
684 promotes the evolution of a greater plasticity (Lande 2009). Accordingly, a recent  
685 transplantation study conducted *in natura* also identified greater transcriptomic  
686 plasticity in a more thermotolerant (in-shore) population compared with an (off-shore)  
687 population inhabiting a more stable thermal habitat in the mustard hill coral *P.*  
688 *astreoides* (Kenkel & Matz 2016).

689 Importantly however, we also identified several genes whose expression is  
690 constitutively higher in the Om colonies compared to the NC colonies by comparing the  
691 expression levels in the control condition. This process recently called “frontloading”  
692 (Barshis *et al.* 2013) reflects the preemptive expression of stress-response genes, hence  
693 predisposing organisms to better respond to stress. It has been proposed that the  
694 occurrence of plasticity vs. frontloading strategies may depend on the frequency of  
695 stresses relative to the typical response time of organisms, with frequent stresses  
696 promoting frontloading strategies whereas less frequent perturbations would result in  
697 an increased plasticity (Kenkel & Matz 2016). Other conceptual considerations

698 especially in regards to the predictability of environmental variation through  
699 generations should also be taken into account (Danchin 2013; Herman *et al.* 2014). The  
700 frontloading is by definition more costly than plasticity since it transforms a response to  
701 the environment in a constitutive function. Frontloading is therefore a strategy that  
702 would be more efficient when offspring's habitat is highly predictable. On the contrary,  
703 an unpredictable or less predictable offspring environment may promote plasticity to  
704 enable the exploration of a wider phenotypic landscape at a lesser cost. Plasticity and  
705 frontloading are often discussed as mutually exclusive responses (Barshis *et al.* 2013;  
706 Kenkel & Matz 2016). However, corals are known to display a high level of variation in  
707 their reproduction strategies (brooder vs. broadcast spawner) (Whitaker 2006; Baird *et al.*  
708 *al.* 2009), timing (Fan *et al.* 2006) and pelagic larval duration (Harrison & Wallace  
709 1990). Environmental predictability in terms of stress frequency and annual  
710 temperature variation should be therefore limited and we hypothesized that, rather  
711 than being exclusive, plasticity and frontloading often co-occur especially in the  
712 population experiencing extreme environments.

713 Our results clearly support that plasticity and frontloading indeed co-occur specifically  
714 in the thermotolerant Om colonies experiencing a more variable thermal environment *in*  
715 *natura*. To tease apart the biological processes that are regulated via plasticity or  
716 frontloading in *Pocillopora* response to heat stress, we conducted an enrichment  
717 analysis. Keeping in mind that congruency between gene expression and protein levels  
718 should be cautious (Mayfield *et al.* 2016), we propose a detailed discussion of the  
719 response of coral colonies at the molecular level for each main biological process  
720 identified (Supplementary File S11). Notably, we found differences in gene expression  
721 levels in response to temperature increase between the two localities for genes involved

722 in response to heat stress (such as HSPs), detoxification of reactive oxygen species,  
723 apoptosis, mitochondria energetic functioning, and symbiont maintenance with higher  
724 number of differentially expressed genes for the Om corals associated to higher fold  
725 changes. Our results also suggest that allocating energy in heat stress response is at the  
726 expense of other crucial biological processes such as growth and reproductive functions,  
727 even if we could not test experimentally fitness effect of the experimental heat stress.  
728 However, the molecular mechanisms underlying such overall response to heat stress are  
729 still partly unresolved. Interestingly, we also found specific gene expression patterns  
730 linked with epigenetic regulation that could be involved in such mechanisms and could  
731 fuel rapid adaptive evolution (Maumus *et al.* 2009; Torda *et al.* 2017; Jablonka 2017)

## 732 CONCLUSION:

733 Comparison of the response to an ecologically realistic heat stress of corals from the  
734 same genus but pertaining to different species hypotheses thriving in two contrasting  
735 thermal environments sheds light on the molecular basis of thermotolerance. We found  
736 that during heat exposure, the symbiotic community composition remained stable in  
737 colonies from both localities, but we identified major differences in gene regulation  
738 processes in the coral, thereby underlining the role of the coral host in the response to  
739 heat stress. The colonies from the locality displaying the most variable environment  
740 displayed (i) a more plastic transcriptome response involving more differentially  
741 expressed genes and higher fold expression changes; as well as (ii) a constitutive higher  
742 level of expression for another set of genes (frontloading). In the context of climate  
743 change, which is predicted to cause abnormal and rapid temperature increase (IPCC  
744 2014), phenotypic plasticity and the capacity for rapid adaptation through epigenetic



745 regulation and/or genetic assimilation would increase the probability of coral survival.  
746 Previous studies highlighted the importance of reef managements measures (Rogers *et*  
747 *al.* 2015) and assisted evolution (van Oppen *et al.* 2015), but also underlined the  
748 importance of preserving standing genetic/epigenetic variation in wild coral  
749 populations (Matz *et al.* 2017). Our results also suggest that management measures  
750 must include protection of naturally thermotolerant populations as they have the  
751 potential to resist increasing thermal anomalies. Although the molecular mechanisms  
752 we described are most likely largely shared in this group of scleractinians, the question  
753 remains of the determinism of this thermotolerant phenotype and of the heritability of  
754 this character. If some loci are responsible for these differences in thermotolerance, the  
755 possibility of gene flow between populations or even specific lineages in the genus  
756 *Pocillopora*, could deeply impact the response of these species to climate change  
757 (Mumby *et al.* 2011) . It is however essential to keep in mind that even the most  
758 thermotolerant corals may bleach if they are exposed to temperature significantly  
759 higher to their own norm (Hughes *et al.* 2017b; Le Nohaïc *et al.* 2017).

## 760 ACKNOWLEDGEMENTS

761 We are thankful to Dr. Madjid Delghandi from the Center of Marine Biotechnology at  
762 Sultan Qaboos University, the Al-Hail field station and the central laboratory of the  
763 College of Agricultural and Marine Sciences for providing us with necessary equipment  
764 during field work in Oman. We acknowledge Dr Gilles Le Moullac and Dr Yannick  
765 Gueguen from the Centre Ifremer du Pacifique for providing us aquaculture facilities  
766 during sampling. We acknowledge the Plateforme Gentyane of the Institut National de la  
767 Recherche Agronomique (INRA, Clermont-Ferrand, France) for microsatellite

768 genotyping. We also thank the Genotoul bioinformatics platform, and the Toulouse Midi-  
769 Pyrenees and Sigenae group for providing help and computing resources (Galaxy  
770 instance; <http://sigenae-workbench.toulouse.inra.fr> as well as the Bio-Environnement  
771 platform (University of Perpignan) for sequencing and bioinformatics service. This  
772 project was funded by the ADACNI program of the French national research agency  
773 (ANR) (project no. ANR-12-ADAP-0016; <http://adacni.imbe.fr>), the Campus France PHC  
774 program Maïmonide-Israel and the DHOF program of the UMR5244 IHPE  
775 (<http://ihpe.univ-perp.fr/en/ihpe-transversal-holobiont/>). This work is a contribution  
776 to the Labex OT-Med (n° ANR-11-LABX-0061) funded by the ANR  
777 “Investissementsd’Avenir” programthrough the A\*MIDEX project (n° ANR-11-IDEX-  
778 0001-02). This study is set within the framework of the “Laboratoire d’Excellence  
779 (LABEX)” TULIP (ANR-10-LABX-41). We would like to thank the two reviewers of PCI  
780 ecology for their constructive and helpful comments.

## 781 DATA ACCESSIBILITY

782 The datasets generated and analyzed during the current study have been submitted to  
783 the SRA repository under bioproject number PRJNA399069 (to be released upon  
784 publication).

## 785 AUTHORS' CONTRIBUTIONS

786 JVD, MA, DA, GM, and ET were involved in the study concept and design. KBR, LF, MC,  
787 MA, PR and JVD were involved in the collection of samples. All authors were involved in  
788 data acquisition and analyses. KBR, JVD, GM, OR and ET drafted the manuscript, and all  
789 authors contributed to critical revisions and approved the final manuscript.



791 TABLES

792 Table 1: Sea Surface Temperature (SST) regimes to which the colonies sampled in this  
793 study (i.e. Oman and New Caledonia) are exposed in their natural environments.  
794 Thermal regime descriptors were compiled from weekly mean sea surface temperature  
795 data collected from the Integrated Global Ocean Services System Products Bulletin (i.e.  
796 IGOSS: <http://iridl.ldeo.columbia.edu/SOURCES/.IGOSS/>) for quadrats of 1° longitude X  
797 1° latitude and from 1982 to the year of sampling (2013-2014).

|                                  | New Caledonia | Oman |
|----------------------------------|---------------|------|
| Mean SST (°C)                    | 24.8          | 27.9 |
| Variance (°C)                    | 2.7           | 9.5  |
| Min SST (°C)                     | 22.6          | 22.1 |
| Max SST (°C)                     | 27.1          | 33.2 |
| Mean SST of 3 warmer months (°C) | 26.8          | 31.3 |
| Mean SST of 3 cooler months (°C) | 22.8          | 23.8 |

798

799

800 **FIGURE LEGENDS**

801 **FIGURE 1:** The ecologically realistic heat stress experiment: from mean temperatures of  
802 the warmer months *in natura* to a pre-bleaching physiological state. Nubbins were  
803 collected at each time point and arrows represent points at which nubbins were chosen  
804 for analyzing the microbial composition and the transcriptomic response of the host.

805 **FIGURE 2:** Principal coordinate analysis plot for Bray-Curtis distances of the bacterial  
806 composition of each colony in each experimental condition. Different colors represent  
807 different colonies, the stars represent the *in situ* conditions, the open circles represent  
808 the control conditions, and the squares represent the stress conditions.

809 **FIGURE 3:** Composition of the Symbiodiniaceae community in each colony *in situ* and in  
810 controlled and stressful experimental conditions.

811 **FIGURE 4:** Hierarchical clustering analyses performed using DESeq2 rlog-normalized  
812 RNA-seq data for the 36 transcriptomes: two conditions (control and heat stress); three  
813 replicates per condition for each colony; three colonies per locality; and two localities  
814 [Oman (Om) and New Caledonia (NC)]. The color (from white to dark blue) indicates the  
815 distance metric used for clustering (dark blue corresponds to the maximum correlation  
816 values).

817 **FIGURE 5:** Heatmap and clustering of significantly differentially expressed genes  
818 between the control and the heat stress condition for colonies from each locality. Each  
819 gene is represented by a line.

820 **FIGURE 6:** Scatterplot of the log<sub>2</sub>-fold changes in gene expression in response to heat  
821 stress in the Om colonies (y-axis) vs. the NC colonies (x-axis) for the 848 genes that were

822 over-expressed (498 genes) or under-expressed (350 genes) in colonies from both  
823 localities. The line represents the  $y=x$  line depicting similar responses between colonies.

824 FIGURE 7: Colony level gene expression variation in response to heat stress, based on  
825 DAPC analysis. The x-axis is the first discriminant function of the DAPC along which the  
826 overall gene expression difference between colonies at both experimental conditions  
827 (stress and control) and from both localities (NC and Om) was maximized. This indicates  
828 the degree of similarity between the transcriptomes. The density plots obtained for NC  
829 and Om colonies are represented in blue and green, respectively. Dark and light density  
830 plots correspond to samples from the control and stress experimental conditions. The  
831 arrows above the density plots represent the direction of the mean change in the gene  
832 expression profiles.

833 FIGURE 8: Summary of the GO enrichment analysis following REVIGO synthesis. Each  
834 enriched biological process is represented by a bar proportional to the  $\log_{10}(\text{FDR})$ . The  
835 colors correspond to the three categories of genes (common: black; Om-specific: grey;  
836 NC-specific: white) that were over-expressed (left panel) or under-expressed (right  
837 panel).

838

839 SUPPLEMENTARY FILES

840 Supplementary Figure S1: Experimental setup. Four tanks were used for each locality, 3  
841 tanks containing the sampled colonies (one replicate per timepoint and per tank) and  
842 one additional tank as a control of coral health at the control temperature during the  
843 experiment.

844 Supplementary Table S2: Haplotype analysis of the six sampled colonies with  
845 microsatellite genotyping for the colonies from New Caledonia.

846 Supplementary Figure S3: Bacterial class composition (for the 24 most abundant) within  
847 each replicate for the Om and NC colonies, the three colonies of each locality, and three  
848 experimental conditions per colony. *In situ* (dark arrows); control temperature (green  
849 arrows); stress temperature (red arrows).

850 Supplementary Table S4: ANOVA results for alpha diversity (Shannon index) and beta  
851 diversity (Bray-Curtis distance) between localities, colonies, or experimental conditions.

852 Supplementary File S5: List and sequences of the 26,600 genes (XLOC) generated during  
853 RNAseq alignment.

854 Supplementary Figure S6: Heatmap and clustering of significantly differentially  
855 expressed genes between the control and the heat stress condition for each colony from  
856 the two localities. Each gene is represented by a line.

857 Supplementary File S7: DEseq2 results for the log<sub>2</sub>-foldchanges, and adjusted *p* values  
858 between stress and control conditions for each locality (sheet 1) and for each colony  
859 (sheet 2).

860 Supplementary Table S8: Comparison between the log<sub>2</sub>-foldchange in Om and NC  
861 colonies for genes differentially under-expressed or over-expressed in the same way in  
862 colonies from both localities.

863 Supplementary File S9: GO enrichment results for biological processes, molecular  
864 functions, and cellular compartments for common, New Caledonia-specific, or Oman-  
865 specific over-expressed and under-expressed genes.

866 Supplementary File S10: Frontloaded genes in Oman corals among genes over-  
867 expressed in New Caledonia corals.

868 Supplementary File S11: Description of the functional analysis of genes, biological  
869 functions and cell compartment involved in the response to stress.

870

871



872 REFERENCES:

873

874 Adjeroud M, Guérécheau A, Vidal-Dupiol J *et al.* (2013) Genetic diversity, clonality and  
875 connectivity in the scleractinian coral *Pocillopora damicornis*: a multi-scale analysis  
876 in an insular, fragmented reef system. *Marine Biology*, **161**, 531–541.

877 Ainsworth TD, Wasmund K, Ukani L *et al.* (2011) Defining the tipping point: a complex  
878 cellular life/death balance in corals in response to stress. *Scientific Reports*, **1**, 160.

879 Altschul SF, Gish W, Miller W, Myers EW, Lipman DJ (1990) Basic local alignment search  
880 tool. *Journal of molecular biology*, **215**, 403–410.

881 Anders S, Pyl PT, Huber W (2015) HTSeq--a Python framework to work with high-  
882 throughput sequencing data. *Bioinformatics*, **31**, 166–169.

883 Arnaud-Haond S, Belkhir K (2006) genclone: a computer program to analyse genotypic  
884 data, test for clonality and describe spatial clonal organization. *Molecular Ecology*  
885 *Notes*, **7**, 15–17.

886 Baird AH, Guest JR, Willis BL (2009) Systematic and Biogeographical Patterns in the  
887 Reproductive Biology of Scleractinian Corals. *Annual Review of Ecology, Evolution,*  
888 *and Systematics*, **40**, 551–571.

889 Baker AC (2003) Flexibility and specificity in coral-algal symbiosis: diversity, ecology,  
890 and biogeography of *Symbiodinium*. *Annual Review of Ecology*.

891 Barnosky AD, Matzke N, Tomiya S *et al.* (2011) Has the Earth's sixth mass extinction  
892 already arrived? *Nature*, **471**, 51–57.

893 Barshis DJ, Barshis DJ, Ladner JT *et al.* (2013) From the Cover: Genomic basis for coral  
894 resilience to climate change. *Proceedings of the National Academy of Sciences*, **110**,  
895 1387–1392.

896 Bellantuono AJ, Bellantuono AJ, Granados-Cifuentes C *et al.* (2012a) Coral Thermal  
897 Tolerance: Tuning Gene Expression to Resist Thermal Stress. *PLoS one*, **7**, e50685.

898 Bellantuono AJ, Hoegh-Guldberg O, Rodriguez-Lanetty M (2012b) Resistance to thermal  
899 stress in corals without changes in symbiont composition. *Proceedings. Biological*  
900 *sciences*, **279**, 1100–1107.

901 Bellwood DR, Hughes TP, Folke C, Nyström M (2004) Confronting the coral reef crisis.  
902 *Nature*, **429**, 827–833.

903 Benjamini Y, Hochberg Y (1995) Controlling the false discovery rate: a practical and  
904 powerful approach to multiple testing. *Journal of the royal statistical society Series B*,  
905 **57**, 289–300.

906 Berkelmans R, van Oppen MJH (2006) The role of zooxanthellae in the thermal tolerance  
907 of corals: a “nugget of hope” for coral reefs in an era of climate change. *Proceedings*  
908 *of the Royal Society B*, **273**, 2305–2312.

909 Blankenberg D, Gordon A, Kuster Von G *et al.* (2010) Manipulation of FASTQ data with  
910 Galaxy. *Bioinformatics*, **26**, 1783–1785.

911 Bordenstein SR, Theis KR (2015) Host Biology in Light of the Microbiome: Ten Principles  
912 of Holobionts and Hologenomes. *PLoS biology*, **13**, e1002226.

913 Bourne DG, Munn CB (2005) Diversity of bacteria associated with the coral *Pocillopora*  
914 *damicornis* from the Great Barrier Reef. *Environmental microbiology*, **7**, 1162–1174.

915 Brener-Raffalli K, Clerissi C, Vidal-Dupiol J *et al.* (2018) Thermal regime and host clade,  
916 rather than geography, drive *Symbiodinium* and bacterial assemblages in the  
917 scleractinian coral *Pocillopora damicornis sensu lato*. *Microbiome*, **6**, 2.

918 Brown BE, Downs CA, Dunne RP, Gibb SW (2002) Exploring the basis of

- 919 thermotolerance in the reef coral *Goniastrea aspera*. *Marine Ecology Progress Series*,  
920 **242**, 119–129.
- 921 Coles SL, Riegl BM (2013) Thermal tolerances of reef corals in the Gulf: a review of the  
922 potential for increasing coral survival and adaptation to climate change through  
923 assisted translocation. *Marine Pollution Bulletin*, **72**, 323–332.
- 924 Conesa A, Madrigal P, Tarazona S *et al.* (2016) A survey of best practices for RNA-seq  
925 data analysis. *Genome biology*, **17**, 1.
- 926 Cróquer A, Bastidas C, Elliott A, Sweet M (2013) Bacterial assemblages shifts from  
927 healthy to yellow band disease states in the dominant reef coral *Montastraea*  
928 *faveolata*. *Environmental Microbiology Reports*, **5**, 90–96.
- 929 Danchin E (2013) Avatars of information: towards an inclusive evolutionary synthesis.  
930 *Trends in Ecology & Evolution*, **28**, 351–358.
- 931 de Hoon MJL, Imoto S, Nolan J, Miyano S (2004) Open source clustering software.  
932 *Bioinformatics*, **20**, 1453–1454.
- 933 Dixon GB, Davies SW, Aglyamova GA *et al.* (2015) CORAL REEFS. Genomic determinants  
934 of coral heat tolerance across latitudes. *Science (New York, N.Y.)*, **348**, 1460–1462.
- 935 Dobin A, Davis CA, Schlesinger F *et al.* (2013) STAR: ultrafast universal RNA-seq aligner.  
936 *Bioinformatics*, **29**, 15–21.
- 937 Escudié F, Auer L, Bernard M *et al.* (2018) FROGS: Find, Rapidly, OTUs with Galaxy  
938 Solution. *Bioinformatics*, **34(8)**:1287-1294.
- 939 Fan TY, Lin KH, Kuo FW, Soong K, Liu LL (2006) Diel patterns of larval release by five  
940 brooding scleractinian corals. *Marine Ecology Progress Series*, **321**, 133-142
- 941 Gélin P, Fauvelot C, Mehn V *et al.* (2017a) Superclone Expansion, Long-Distance Clonal  
942 Dispersal and Local Genetic Structuring in the Coral *Pocillopora damicornis* Type  $\beta$  in  
943 Reunion Island, South Western Indian Ocean. *PloS one*, **12**, e0169692.
- 944 Gélin P, Pirog A, Fauvelot C, Magalon H (2018) High genetic differentiation and low  
945 connectivity in the coral *Pocillopora damicornis* type  $\beta$  at different spatial scales in  
946 the Southwestern Indian Ocean and the Tropical Southwestern Pacific. *Marine*  
947 *Biology*, **165**, 531.
- 948 Gélin P, Postaire B, Fauvelot C, Magalon H (2017b) Reevaluating species number,  
949 distribution and endemism of the coral genus *Pocillopora* Lamarck, 1816 using  
950 species delimitation methods and microsatellites. *Molecular Phylogenetics and*  
951 *Evolution*. **109**, 430-446.
- 952 Giardine B, Giardine B, Riemer C *et al.* (2005) Galaxy: A platform for interactive large-  
953 scale genome analysis. *Genome Research*, **15**, 1451–1455.
- 954 Guerrero R, Margulis L, Berlanga M (2013) Symbiogenesis: the holobiont as a unit of  
955 evolution. *International Microbiology*, **16**, 133–143.
- 956 Harrison PL, Wallace CC (1990) *Reproduction, dispersal and recruitment of scleractinian*  
957 *corals*. Ecosystems of the world. in Z Dubinsky (ed.), Coral reefs, Ecosystems of the  
958 world; 25, Elsevier, Amsterdam, Netherlands, pp. 133-207.
- 959 Herman JJ, Spencer HG, Donohue K, Sultan SE (2014) How stable “should” epigenetic  
960 modifications be? Insights from adaptive plasticity and bet hedging. *Evolution*, **68**,  
961 632–643.
- 962 Hernandez-Agreda A, Gates RD, Ainsworth TD (2016) Defining the Core Microbiome in  
963 Corals’ Microbial Soup. *Trends in Microbiology*. **25**:125-140.
- 964 Hoegh-Guldberg O, Mumby PJ, Hooten AJ *et al.* (2007) Coral reefs under rapid climate  
965 change and ocean acidification. *Science (New York, N.Y.)*, **318**, 1737–1742.

- 966 Hughes TP, Baird AH, Bellwood DR *et al.* (2003) Climate change, human impacts, and the  
967 resilience of coral reefs. *Science (New York, N.Y.)*, **301**, 929–933.
- 968 Hughes TP, Barnes ML, Bellwood DR *et al.* (2017a) Coral reefs in the Anthropocene.  
969 *Nature*, **546**, 82–90.
- 970 Hughes TP, Kerry JT, Álvarez-Noriega M *et al.* (2017b) Global warming and recurrent  
971 mass bleaching of corals. *Nature*, **543**, 373–377.
- 972 Hume B, D'Angelo C, Burt J *et al.* (2013) Corals from the Persian/Arabian Gulf as models  
973 for thermotolerant reef-builders: Prevalence of clade C3 *Symbiodinium*, host  
974 fluorescence and ex situ temperature tolerance. *Marine Pollution Bulletin*, **72**, 313–  
975 322.
- 976 IPCC, 2014: Climate Change 2014: Synthesis Report. Contribution of Working Groups I, II  
977 and III to the Fifth Assessment Report of the Intergovernmental Panel on Climate  
978 Change [Core Writing Team, R.K. Pachauri and L.A. Meyer (eds.)]. IPCC, Geneva,  
979 Switzerland, 151 pp.
- 980 Jablonka E (2017) The evolutionary implications of epigenetic inheritance. *Interface*  
981 *focus*, **7**, 20160135.
- 982 Jombart T, Devillard S, Balloux F (2010) Discriminant analysis of principal components:  
983 a new method for the analysis of genetically structured populations. *BMC genetics*,  
984 **11**, 94.
- 985 Kenkel CD, Matz MV (2016) Gene expression plasticity as a mechanism of coral  
986 adaptation to a variable environment. *Nature Ecology & Evolution*, **1**, 0014.
- 987 Kenkel CD, Meyer E, Matz MV (2013) Gene expression under chronic heat stress in  
988 populations of the mustard hill coral (*Porites astreoides*) from different thermal  
989 environments. *Molecular Ecology*, **22**, 4322–4334.
- 990 Klindworth A, Pruesse E, Schweer T *et al.* (2012) Evaluation of general 16S ribosomal  
991 RNA gene PCR primers for classical and next-generation sequencing-based diversity  
992 studies. *Nucleic Acids Research*, **41**, e1–e1.
- 993 Lajeunesse TC, Trench RK (2000) Biogeography of two species of *Symbiodinium*  
994 (Freudenthal) inhabiting the intertidal sea anemone *Anthopleura elegantissima*  
995 (Brandt). *The Biological bulletin*, **199**, 126–134.
- 996 Lajeunesse TC, Parkinson JE, Gabrielson PW *et al.* (2018) Systematic Revision of  
997 Symbiodiniaceae Highlights the Antiquity and Diversity of Coral Endosymbionts.  
998 *Current Biology*, **28**, 2570–2580.e6.
- 999 Lande R (2009) Adaptation to an extraordinary environment by evolution of phenotypic  
1000 plasticity and genetic assimilation. *Journal of Evolutionary Biology*, **22**, 1435–1446.
- 1001 Le Nohaïc M, Ross CL, Cornwall CE *et al.* (2017) Marine heatwave causes unprecedented  
1002 regional mass bleaching of thermally resistant corals in northwestern Australia.  
1003 *Scientific Reports*, **7**, 14999.
- 1004 Li J, Chen Q, Long L-J *et al.* (2014) Bacterial dynamics within the mucus, tissue and  
1005 skeleton of the coral *Porites lutea* during different seasons. *Scientific Reports*, **4**,  
1006 7320.
- 1007 Little AF, van Oppen MJH, Willis BL (2004) Flexibility in algal endosymbioses shapes  
1008 growth in reef corals. *Science (New York, N.Y.)*, **304**, 1492–1494.
- 1009 Littman R, Bourne DG, Willis BL (2010) Responses of coral-associated bacterial  
1010 communities to heat stress differ with *Symbiodinium* type on the same coral host.  
1011 *Molecular Ecology*, **19**, 1978–1990.
- 1012 Love MI, Huber W, Anders S (2014) Moderated estimation of fold change and dispersion

- 1013 for RNA-seq data with DESeq2. *Genome biology*, **15**, 31.
- 1014 Magoč T, Salzberg SL (2011) FLASH: fast length adjustment of short reads to improve  
1015 genome assemblies. *Bioinformatics*. **27**, 2957-63.
- 1016 Mahé F, Rognes T, Quince C, De Vargas C, Dunthorn M (2014) Swarm: robust and fast  
1017 clustering method for amplicon-based studies. *PeerJ*, **2**, e593.
- 1018 Margulis L, Fester R (1991) *Symbiosis as a Source of Evolutionary Innovation*. MIT Press.
- 1019 Martin M (2011) Cutadapt removes adapter sequences from high-throughput  
1020 sequencing reads. *EMBnet journal*, **17**, 10.
- 1021 Matz MV, Treml EA, Aglyamova GA, van Oppen MJH, Bay LK (2017) Potential for rapid  
1022 genetic adaptation to warming in a Great Barrier Reef coral. *bioRxiv*.  
1023 doi.org/10.1101/114173
- 1024 Maumus F, Allen AE, Mhiri C *et al.* (2009) Potential impact of stress activated  
1025 retrotransposons on genome evolution in a marine diatom. *BMC Genomics*, **10**, 624.
- 1026 Mayfield AB, Wang L-H, Tang P-C *et al.* (2011) Assessing the impacts of experimentally  
1027 elevated temperature on the biological composition and molecular chaperone gene  
1028 expression of a reef coral. *PloS one*, **6**, e26529.
- 1029 Mayfield AB, Wang Y-B, Chen C-S, Chen S-H, Lin C-Y (2016) Dual-compartmental  
1030 transcriptomic + proteomic analysis of a marine endosymbiosis exposed to  
1031 environmental change. *Molecular Ecology*, **25**, 5944–5958.
- 1032 Mayfield AB, Wang Y-B, Chen C-S, Lin C-Y, Chen S-H (2014) Compartment-specific  
1033 transcriptomics in a reef-building coral exposed to elevated temperatures. *Molecular  
1034 Ecology*, **23**, 5816–5830.
- 1035 McFall-Ngai M, Hadfield MG, Bosch TC *et al.* (2013) Animals in a bacterial world, a new  
1036 imperative for the life sciences. *Proceedings of the National Academy of Sciences of  
1037 the United States of America*, **110**, 3229–3236.
- 1038 McMurdie PJ, Holmes S (2013) phyloseq: An R Package for Reproducible Interactive  
1039 Analysis and Graphics of Microbiome Census Data (M Watson, Ed.). *PloS one*, **8**,  
1040 e61217.
- 1041 Meyer JL, Rodgers JM, Dillard BA, Paul VJ, Teplitski M (2016) Epimicrobiota Associated  
1042 with the Decay and Recovery of *Orbicella* Corals Exhibiting Dark Spot Syndrome.  
1043 *Frontiers in Microbiology*, **7**, 893.
- 1044 Mumby PJ, Elliott IA, Eakin CM *et al.* (2011) Reserve design for uncertain responses of  
1045 coral reefs to climate change. *Ecology Letters*, **14**, 132–140.
- 1046 Neave MJ, Apprill A, Ferrier-Pages C, Voolstra CR (2016a) Diversity and function of  
1047 prevalent symbiotic marine bacteria in the genus *Endozoicomonas*. *Applied  
1048 microbiology and biotechnology*, **100**, 8315–8324.
- 1049 Neave MJ, Rachmawati R, Xun L *et al.* (2016b) Differential specificity between closely  
1050 related corals and abundant *Endozoicomonas* endosymbionts across global scales.  
1051 *The ISME Journal*, **11**, 186–200.
- 1052 Oliver TA, Palumbi SR (2010) Many corals host thermally resistant symbionts in high-  
1053 temperature habitat. *Coral Reefs*, **30**, 241–250.
- 1054 Palumbi SR, Barshis DJ, Traylor-Knowles N, Bay RA (2014) Mechanisms of reef coral  
1055 resistance to future climate change. *Science (New York, N.Y.)*, **344**, 895–898.
- 1056 Pante E, PUILLANDRE N, Viricel A *et al.* (2015) Species are hypotheses: avoid  
1057 connectivity assessments based on pillars of sand. *Molecular Ecology*, **24**, 525–544.
- 1058 Pantos O, Bongaerts P, Dennis PG, Tyson GW, Hoegh-Guldberg O (2015) Habitat-specific  
1059 environmental conditions primarily control the microbiomes of the coral

- 1060 *Seriatopora hystrix*. *The ISME Journal*, **9**, 1916–1927.
- 1061 Peixoto RS, Rosado PM, Leite DC de A, Rosado AS, Bourne DG (2017) Beneficial  
1062 Microorganisms for Corals (BMC): Proposed Mechanisms for Coral Health and  
1063 Resilience. *Frontiers in Microbiology*, **8**, 100.
- 1064 Pinzón JH, Sampayo E, Cox E *et al.* (2013) Blind to morphology: genetics identifies  
1065 several widespread ecologically common species and few endemics among Indo-  
1066 Pacific cauliflower corals (*Pocillopora*, Scleractinia). *Journal of Biogeography*, **40**,  
1067 1595–1608.
- 1068 Polato NR, Voolstra CR, Schnetzer J *et al.* (2010) Location-specific responses to thermal  
1069 stress in larvae of the reef-building coral *Montastraea faveolata*. *PloS one*, **5**, e11221.
- 1070 Pritchard JK, Stephens M, Donnelly P (2000) Inference of population structure using  
1071 multilocus genotype data. *Genetics*, **155**, 945–959.
- 1072 Quigley KM, Quigley KM, Davies SW *et al.* (2014) Deep-Sequencing Method for  
1073 Quantifying Background Abundances of *Symbiodinium* Types: Exploring the Rare  
1074 Symbiodinium Biosphere in Reef-Building Corals. *PloS one*, **9**, e94297.
- 1075 Reaka-Kudla ML (2005) The global biodiversity of coral reefs: a comparison with rain  
1076 forests.
- 1077 Reusch TBH (2013) Climate change in the oceans: evolutionary versus phenotypically  
1078 plastic responses of marine animals and plants. *Evolutionary Applications*, **7**, 104–  
1079 122.
- 1080 Riegl BM, Purkis SJ, Al-Cibahy AS, Abdel-Moati MA, Hoegh-Guldberg O (2011) Present  
1081 Limits to Heat-Adaptability in Corals and Population-Level Responses to Climate  
1082 Extremes. *PloS one*, **6**, e24802.
- 1083 Rogers A, Harborne AR, Brown CJ *et al.* (2015) Anticipative management for coral reef  
1084 ecosystem services in the 21st century. *Global Change Biology*, **21**, 504–514.
- 1085 Rognes T, Flouri T, Nichols B, Quince C, Mahé F (2016) VSEARCH: a versatile open  
1086 source tool for metagenomics. *PeerJ*. 4:e2584.
- 1087 Rohwer F, Seguritan V, Azam F (2002) Diversity and distribution of coral-associated  
1088 bacteria. *Marine Ecology Progress Series*. **243**, 1-10.
- 1089 Rosenberg E, Koren O, Reshef L, Efrony R, Zilber-Rosenberg I (2007) The role of  
1090 microorganisms in coral health, disease and evolution. *Nature Reviews Microbiology*,  
1091 **5**, 355–362.
- 1092 Saldanha AJ (2004) Java Treeview--extensible visualization of microarray data.  
1093 *Bioinformatics*, **20**, 3246–3248.
- 1094 Sato Y, Willis BL, Bourne DG (2009) Successional changes in bacterial communities  
1095 during the development of black band disease on the reef coral, *Montipora hispida*.  
1096 *The ISME Journal*, **4**, 203–214.
- 1097 Schmidt-Roach S, Miller KJ, Lundgren P, Andreakis N (2014) With eyes wide open: a  
1098 revision of species within and closely related to the *Pocillopora damicornis* species  
1099 complex (Scleractinia; Pocilloporidae) using morphology and genetics. *Zoological  
1100 Journal of the Linnean Society*, **170**, 1–33.
- 1101 Suggett DJ, Warner ME, Leggat W (2017) Symbiotic Dinoflagellate Functional Diversity  
1102 Mediates Coral Survival under Ecological Crisis. *Trends in Ecology & Evolution*, **32**,  
1103 735–745.
- 1104 Supek F, Bošnjak M, Škunca N, Šmuc T (2011) REVIGO summarizes and visualizes long  
1105 lists of gene ontology terms. *PloS one*, **6**, e21800.
- 1106 Theis KR, Dheilly NM, Klassen JL *et al.* (2016) Getting the Hologenome Concept Right: an

- 1107 Eco-Evolutionary Framework for Hosts and Their Microbiomes (JA Gilbert, Ed.),  
1108 *mSystems*, **1**, e00028–16.
- 1109 Torda G, Donelson JM, Aranda M *et al.* (2017) Rapid adaptive responses to climate  
1110 change in corals. *Nature Climate Change*, **7**, 627–636.
- 1111 Trapnell C, Williams BA, Pertea G *et al.* (2010) Transcript assembly and quantification by  
1112 RNA-Seq reveals unannotated transcripts and isoform switching during cell  
1113 differentiation. *Nature Biotechnology*, **28**, 511–515.
- 1114 van Oppen MJH, Oliver JK, Putnam HM, Gates RD (2015) Building coral reef resilience  
1115 through assisted evolution. *Proceedings of the National Academy of Sciences*, **112**,  
1116 2307–2313.
- 1117 van Woesik R, Sakai K, Ganase A, Loya Y (2011) Revisiting the winners and the losers a  
1118 decade after coral bleaching. *Marine Ecology Progress Series*, **434**, 67–76.
- 1119 Veron JEN, Stafford-Smith M (2000) *Corals of the world*. Sea Challengers.
- 1120 Vidal-Dupiol J, Vidal-Dupiol J, Adjeroud M *et al.* (2009) Coral bleaching under thermal  
1121 stress: putative involvement of host/symbiont recognition mechanisms. *BMC*  
1122 *physiology*, **9**, 14.
- 1123 Weis VM (2008) Cellular mechanisms of Cnidarian bleaching: stress causes the collapse  
1124 of symbiosis. *The Journal of experimental biology*, **211**, 3059–3066.
- 1125 Whitaker K (2006) Genetic evidence for mixed modes of reproduction in the coral  
1126 *Pocillopora damicornis* and its effect on population structure. *Marine Ecology*  
1127 *Progress Series*. **306**, 115-124.
- 1128 Ziegler M, Seneca FO, Yum LK, Palumbi SR, Voolstra CR (2017) Bacterial community  
1129 dynamics are linked to patterns of coral heat tolerance. *Nature Communications*, **8**,  
1130 14213.
- 1131 Zilber-Rosenberg I, Rosenberg E (2008) Role of microorganisms in the evolution of  
1132 animals and plants: the hologenome theory of evolution. *FEMS Microbiology Reviews*,  
1133 **32**, 723–735.
- 1134

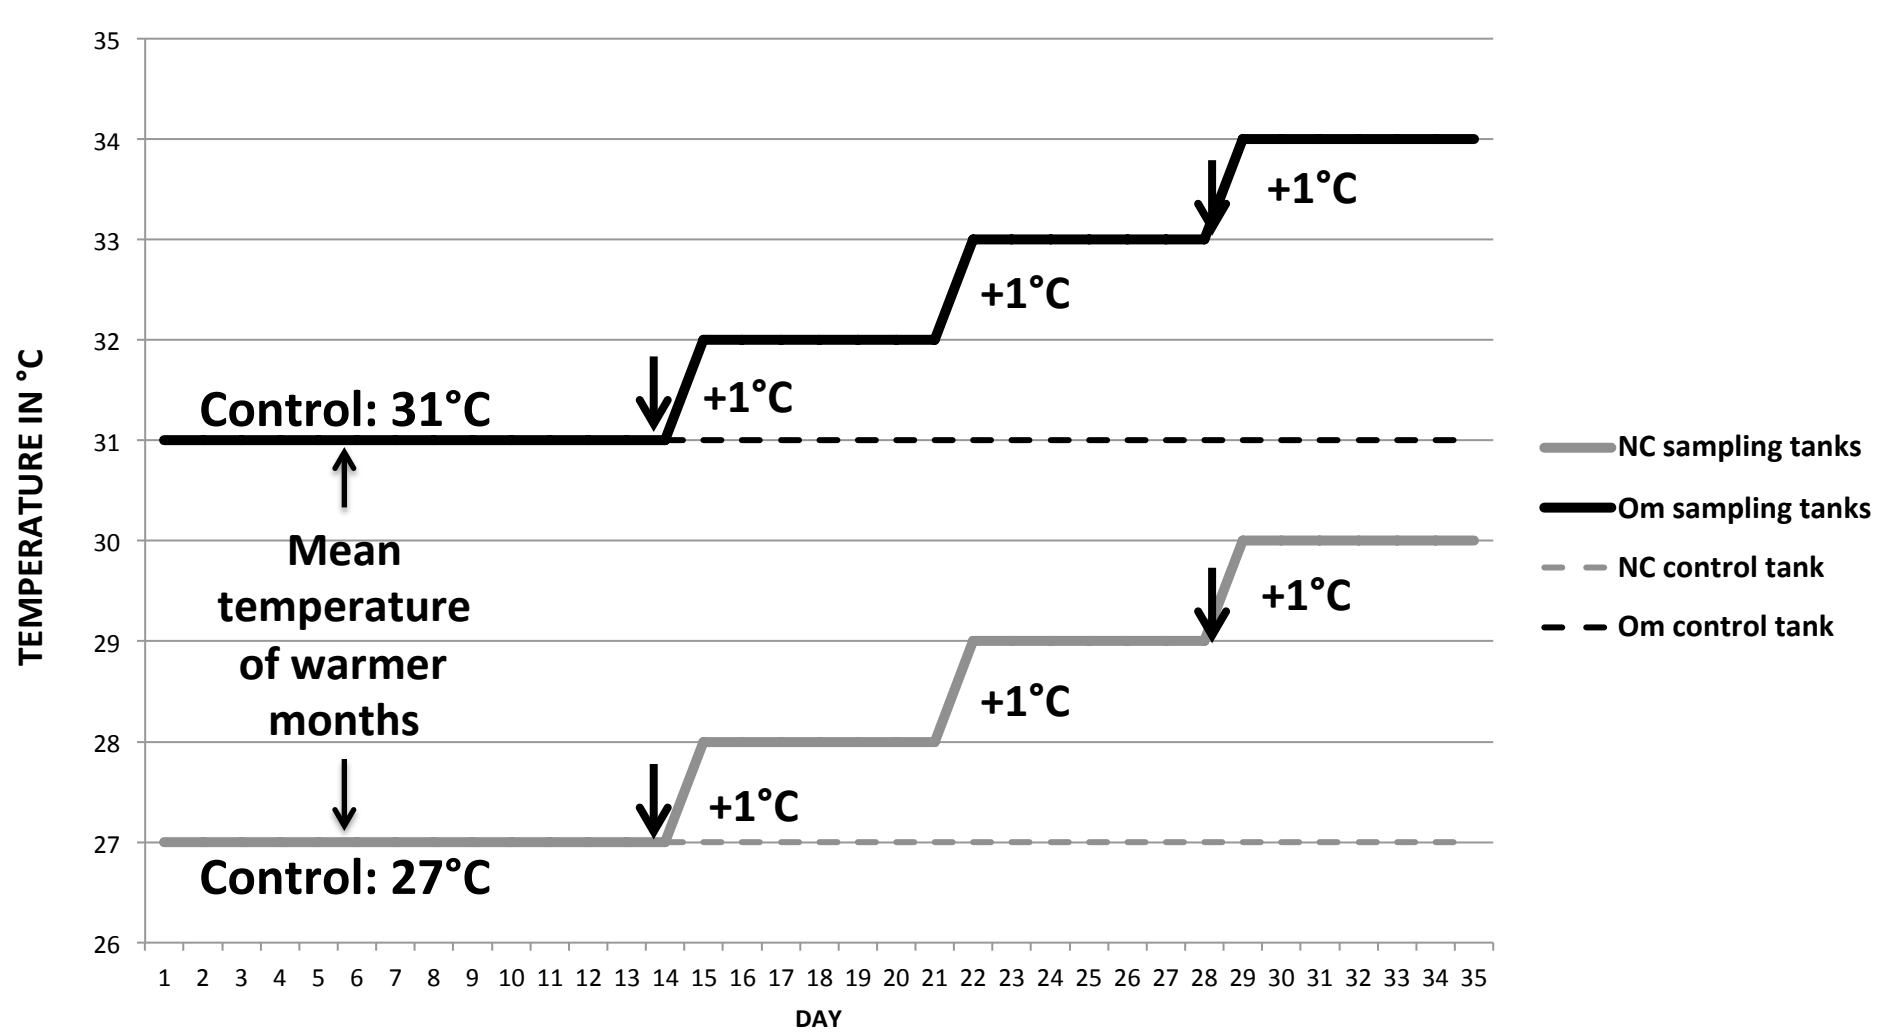





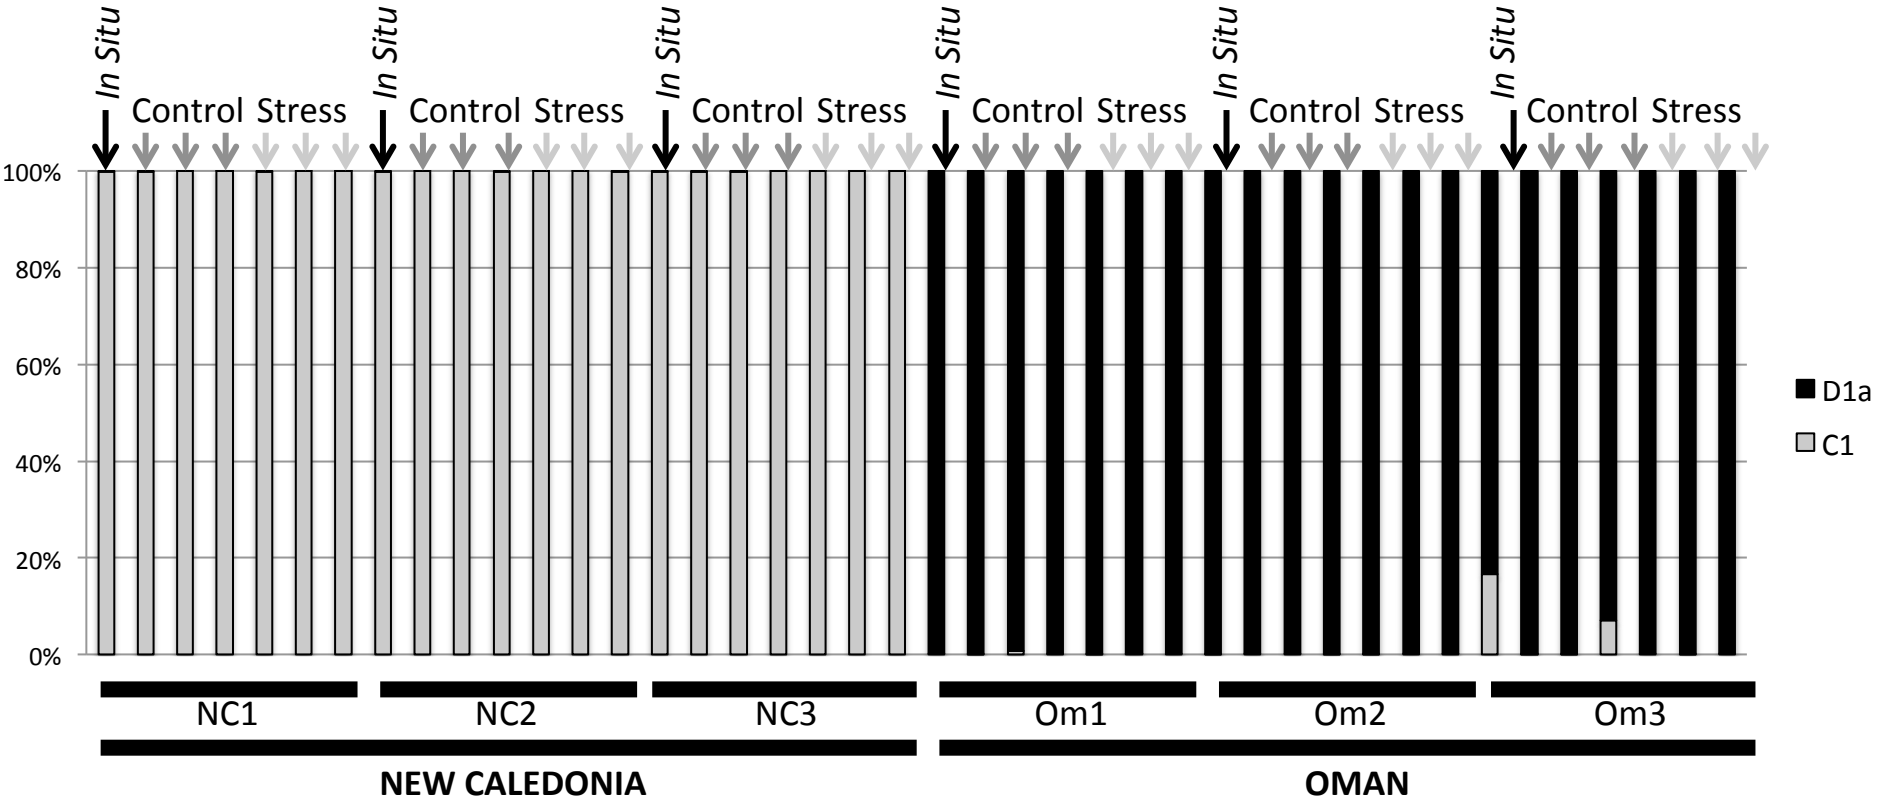

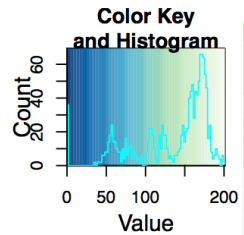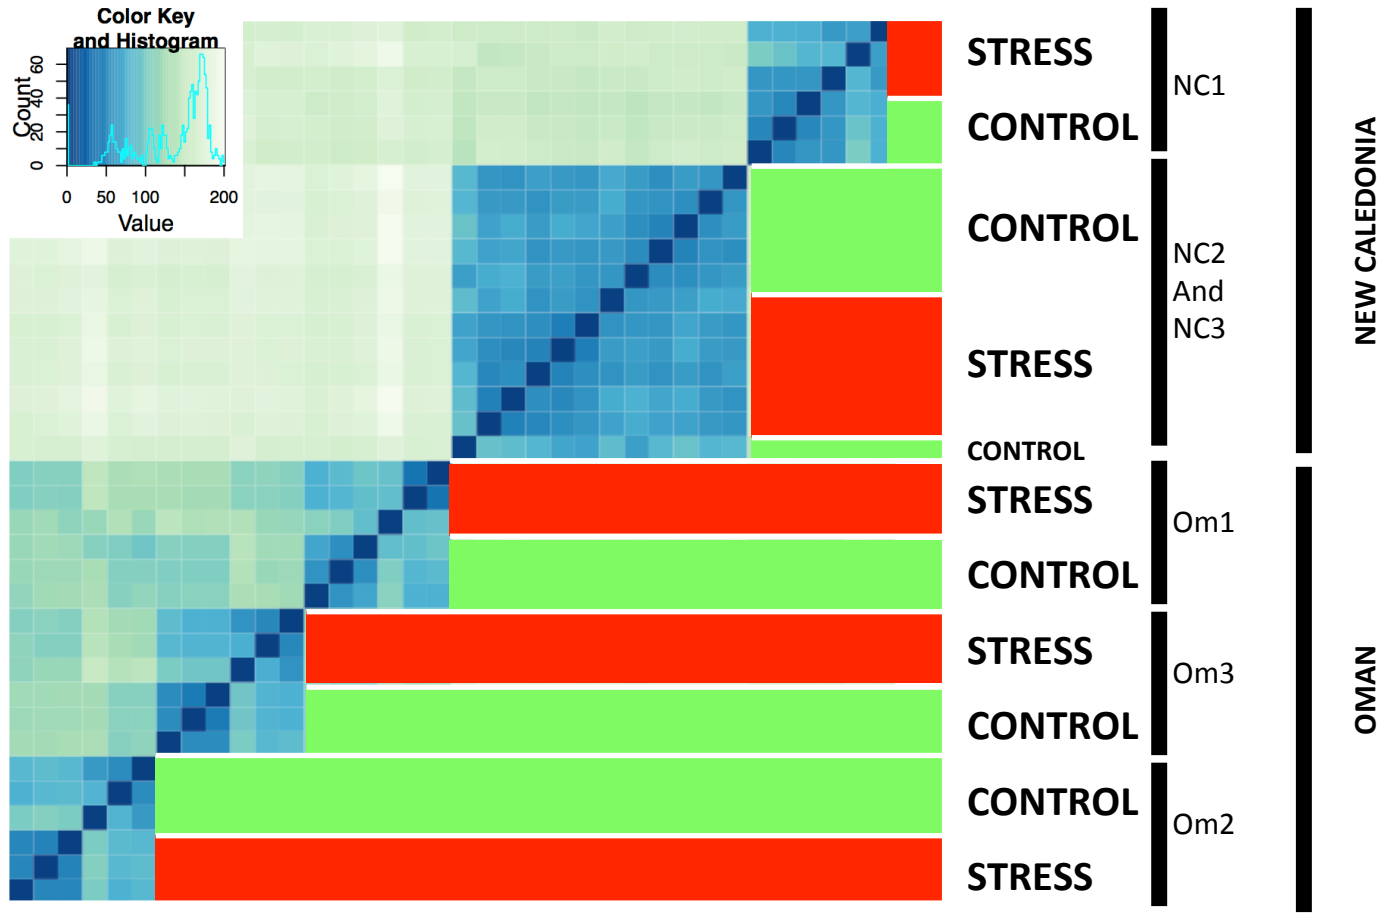

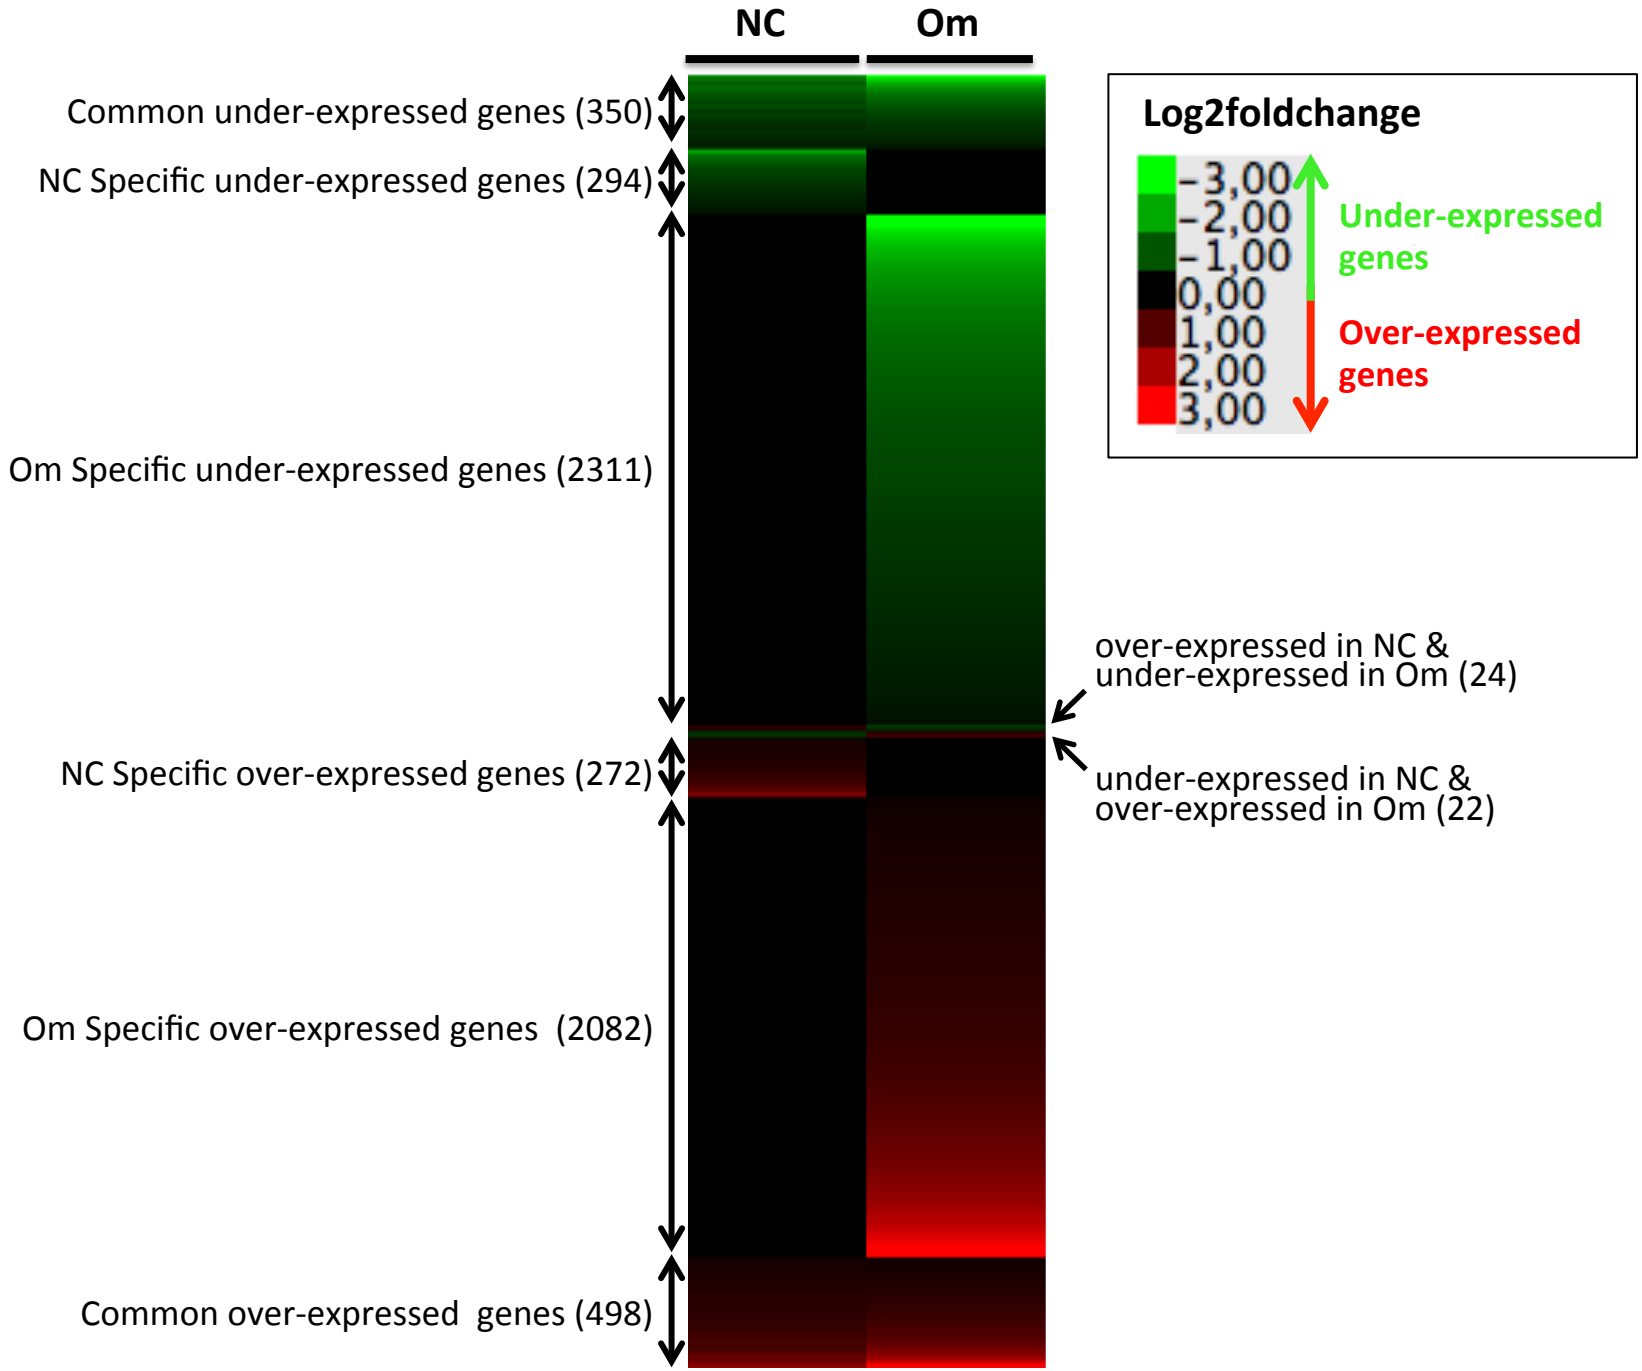

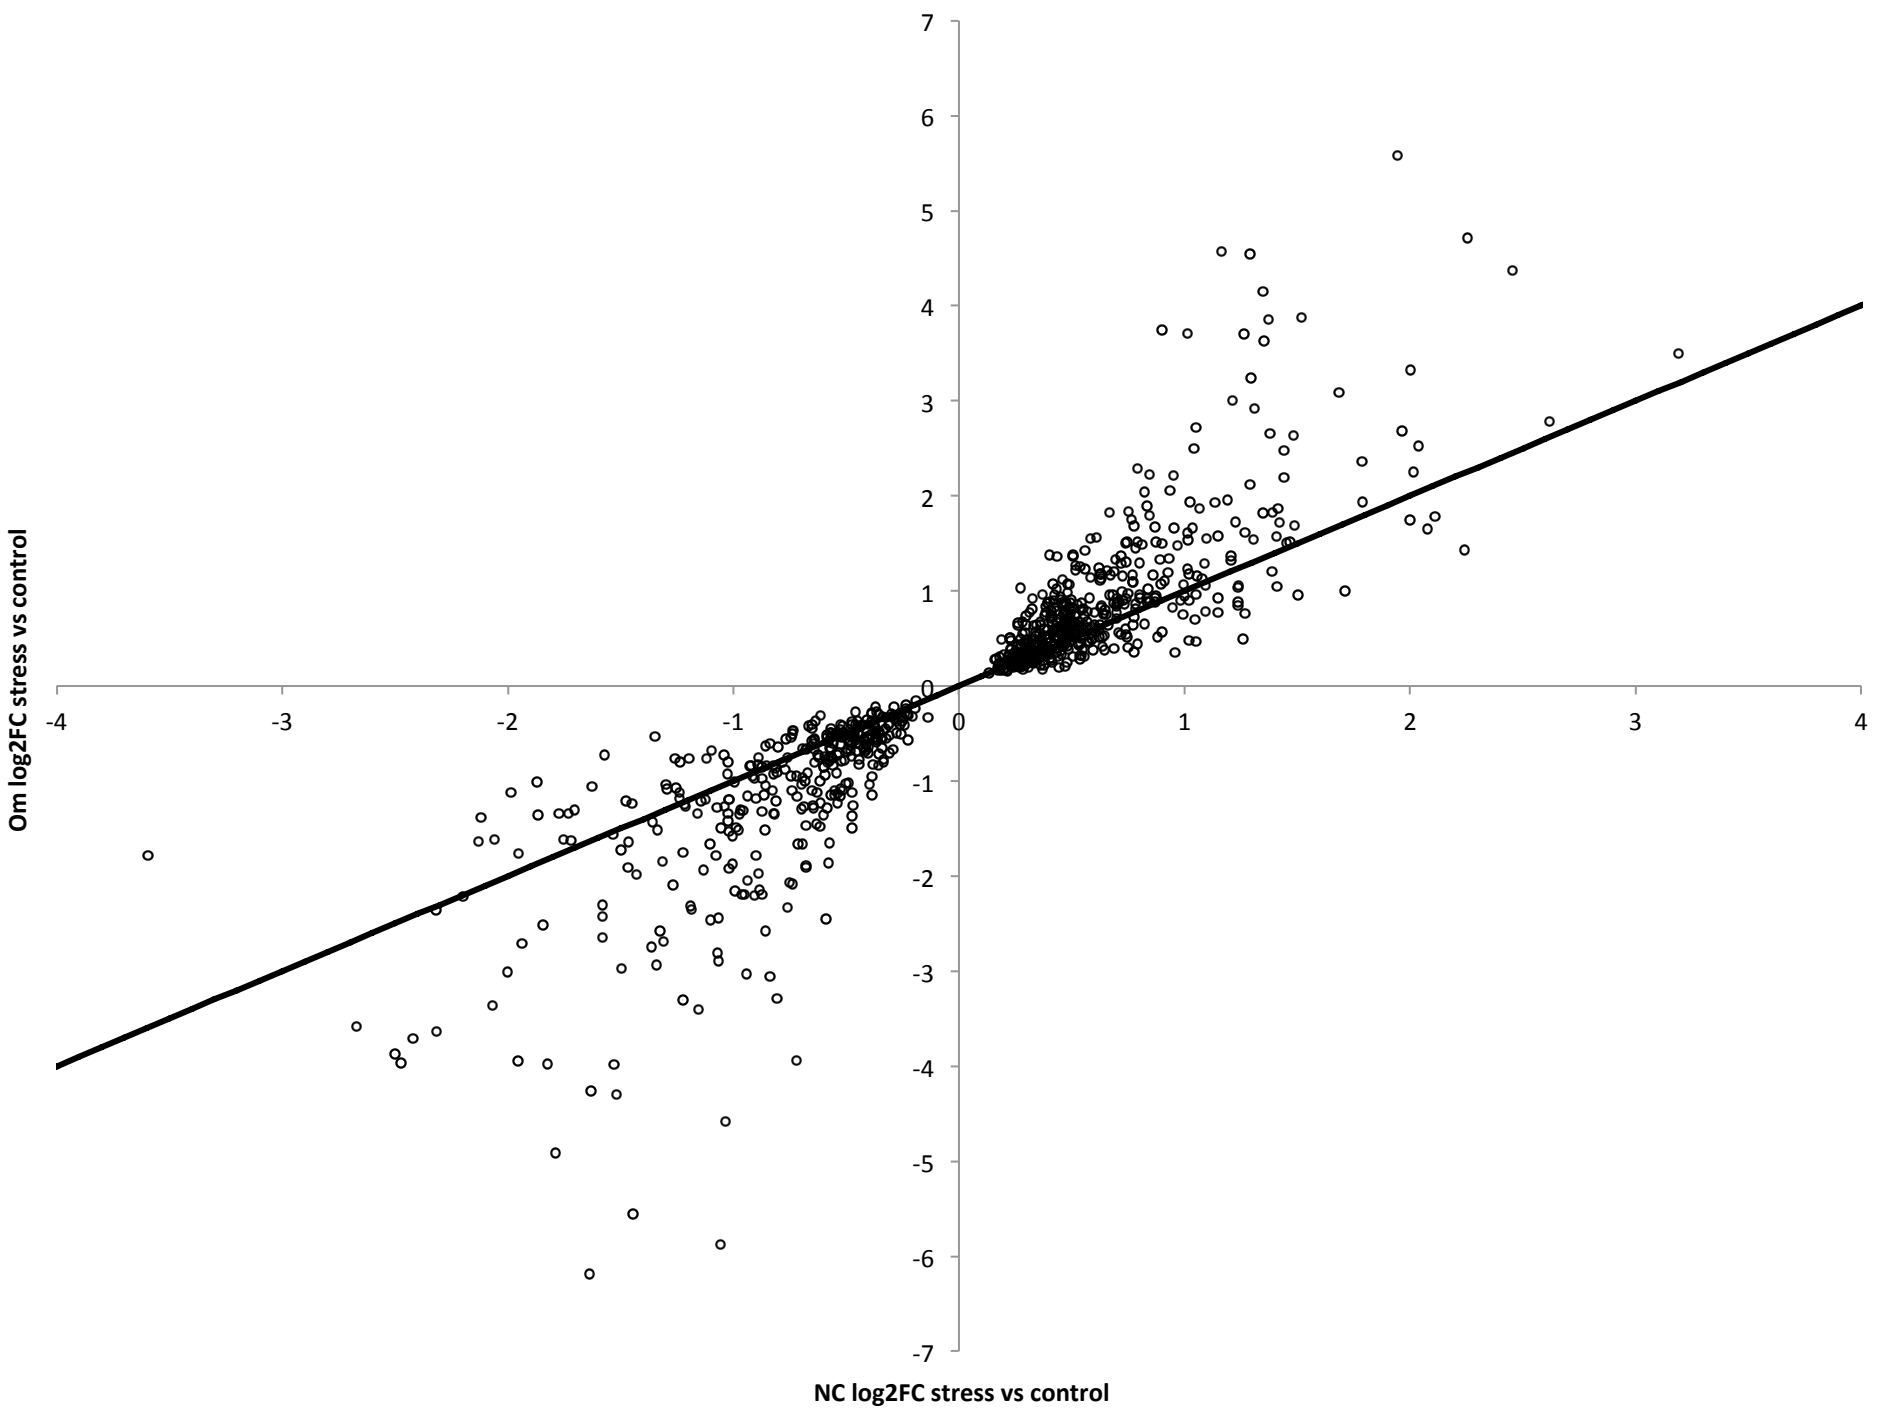

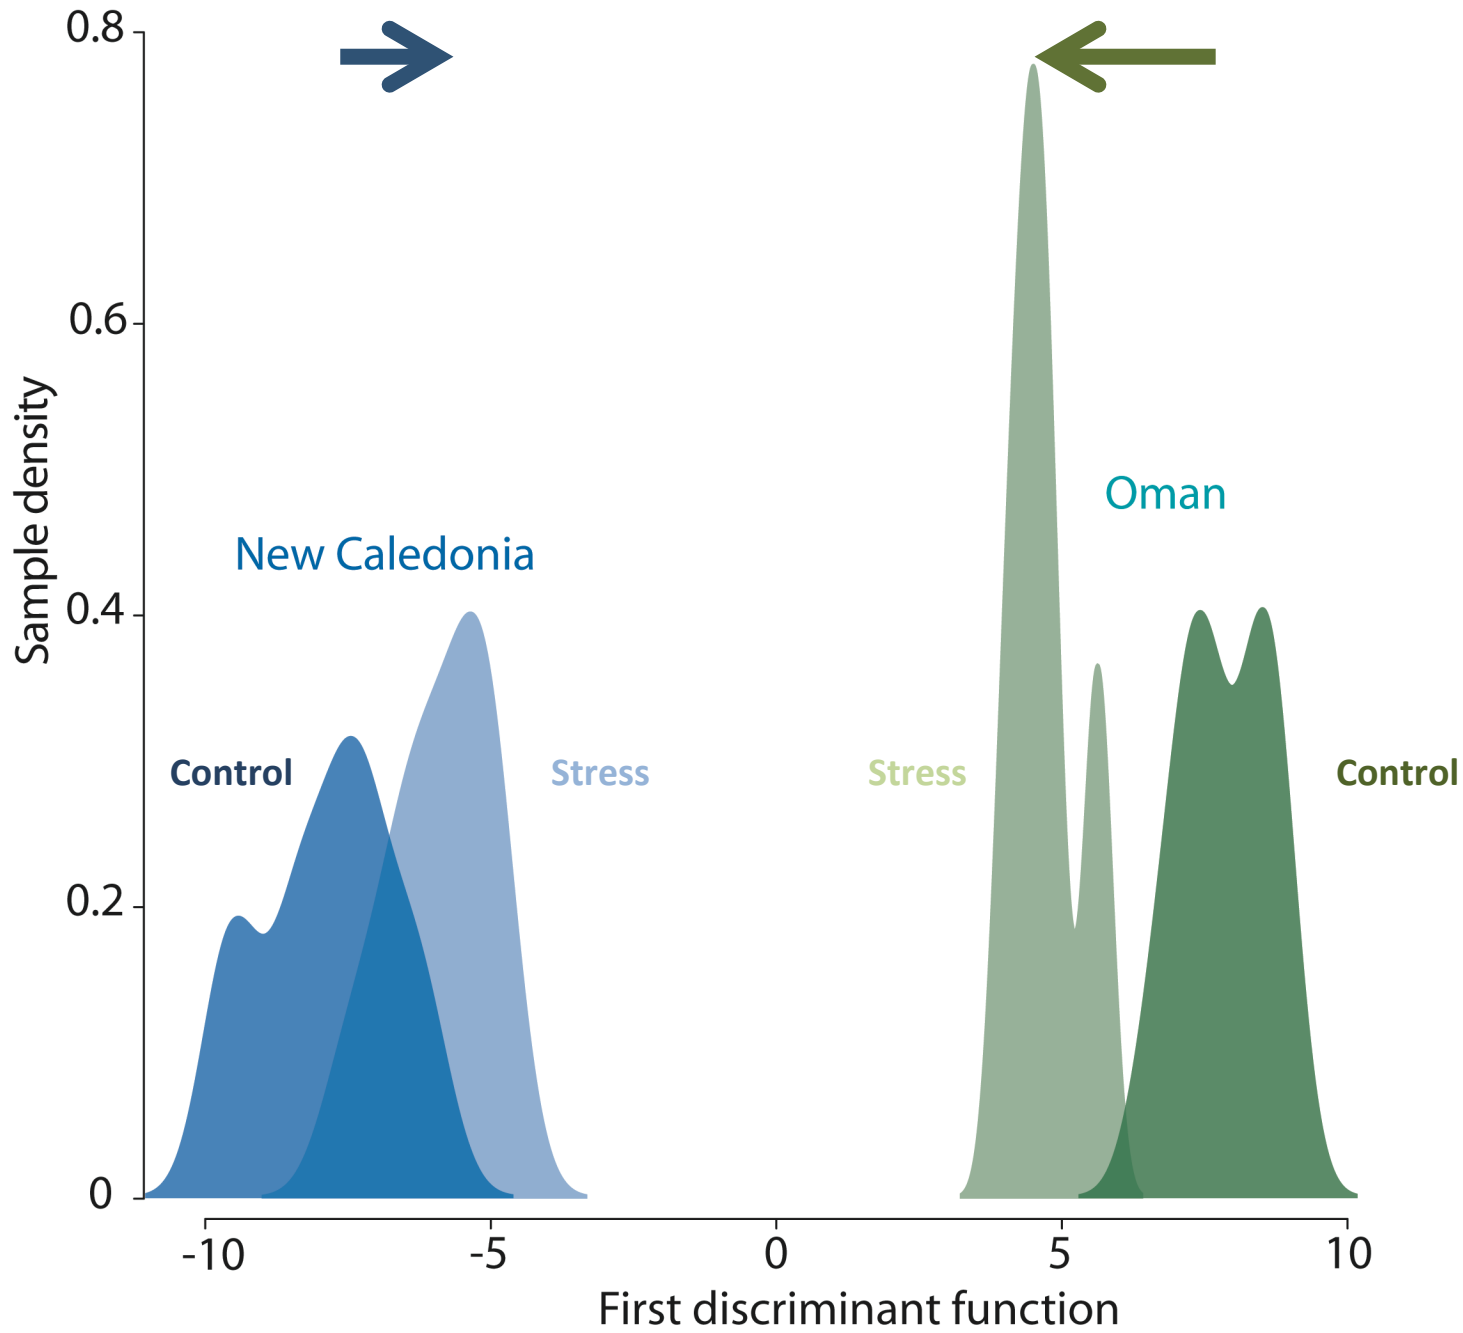

## Over-expressed genes

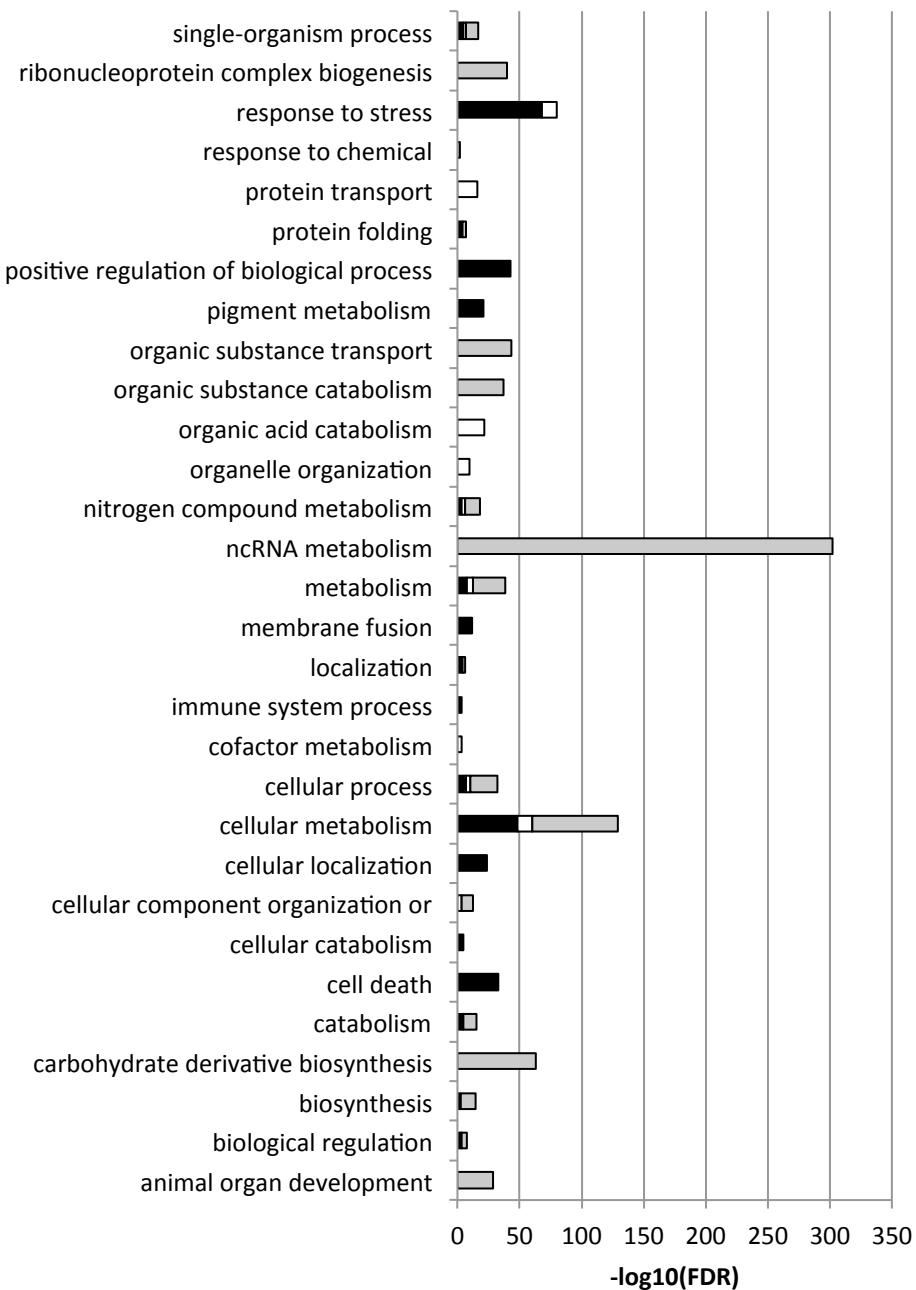

## Under-expressed genes

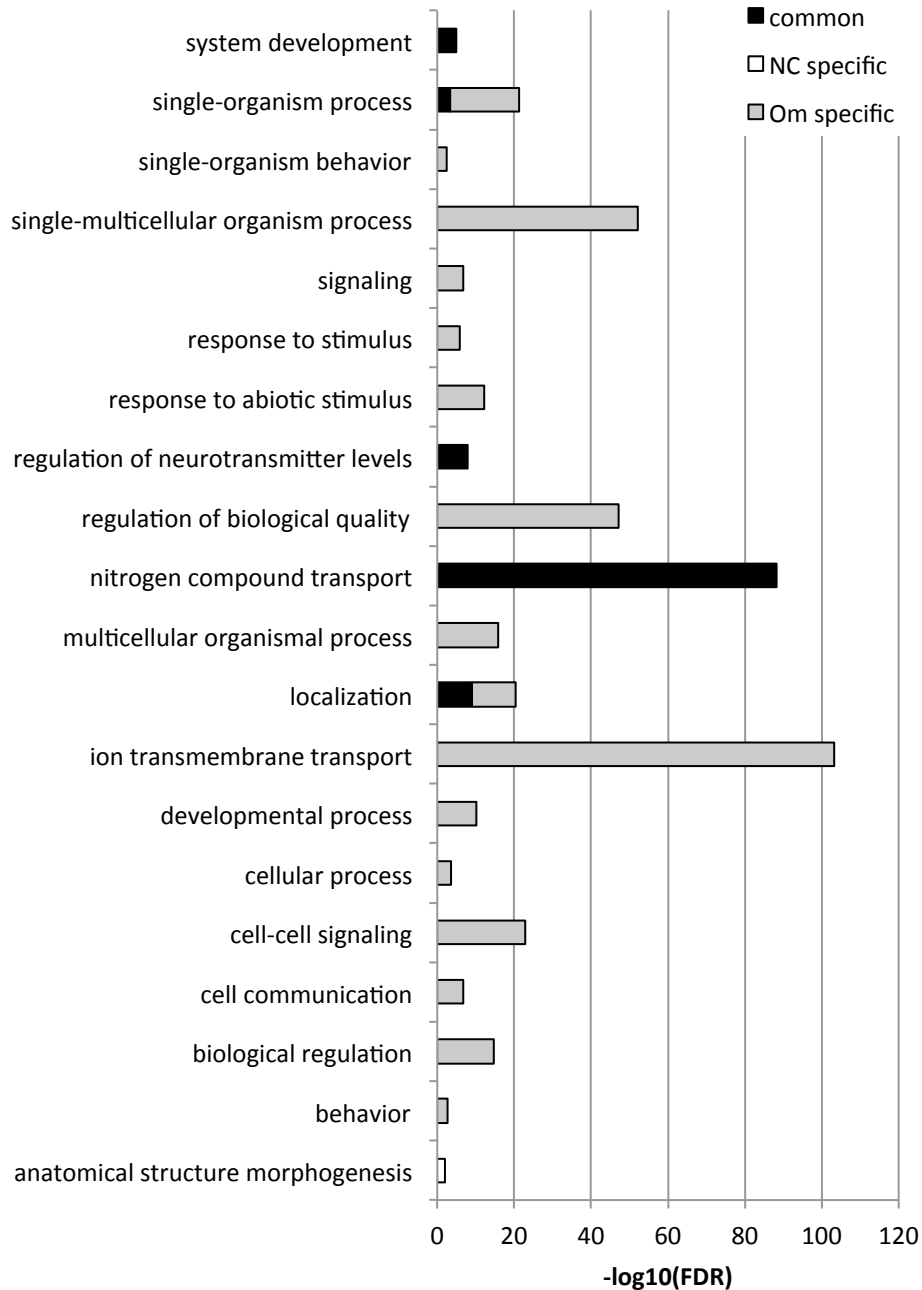

Source: https://www.biorxiv.org/content/10.1101/398602v2.full.pdf
