# Supplementary material for: Gene expression plasticity and frontloading promote thermotolerance in Pocillopora corals
Source: bioRxiv or medRxiv preprint supplement (doi:10.1101/398602), 2019-09-04

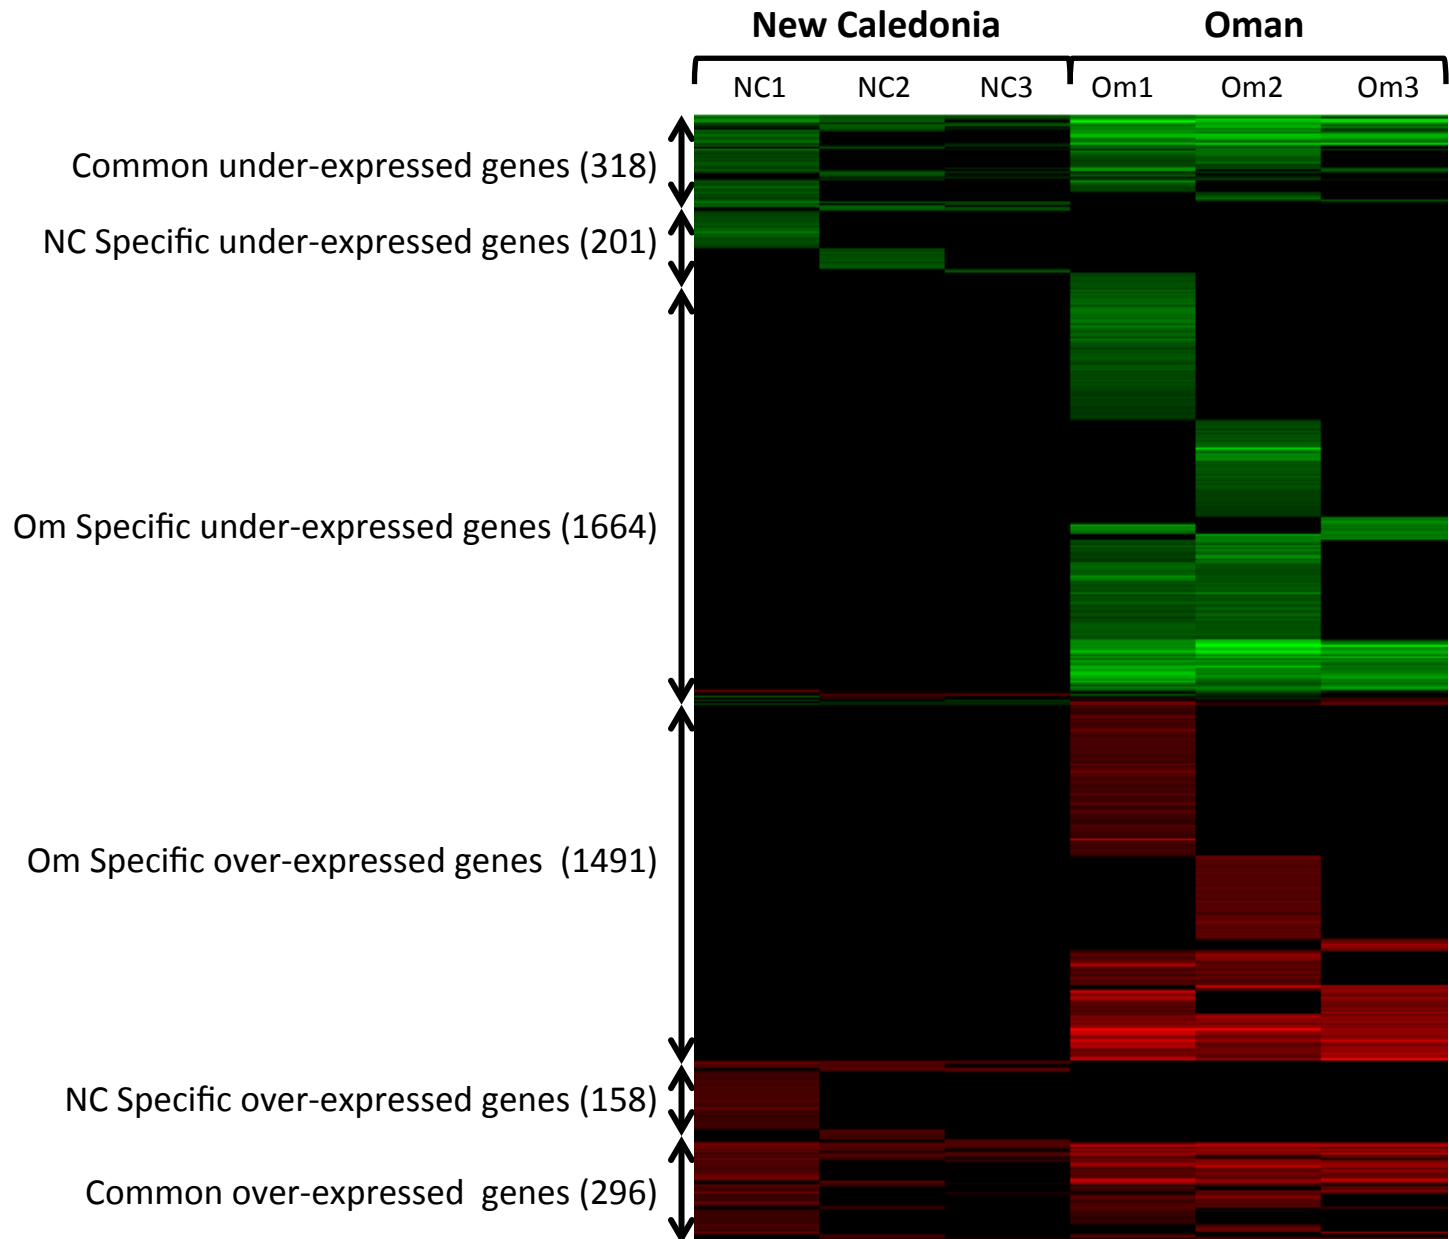

Supplement: Supplementary file [file media-2.pdf]
